# Supplementary material
Source: publisher figshare collection journal article supplement (https://gsajournals.figshare.com/ndownloader/files/16979165)
Supplement: Supplementary file 1 [file 16979165]

## Sheet: Sheet1
	Probe	FlyBase ID	Gene Symbol	logFC	AveExpr	t statistic	P value	adjusted P value	B statistic	Pr(diffExp)
	1633857_at	FBgn0039319	CG13659	4.53272	3.28433	29.4549	5.8e-10	1.1e-05	11.941	0.999993
	1629009_at	FBgn0028940	Cyp28a5	3.27097	6.44137	24.0893	3.23e-09	2.06e-05	10.9169	0.999982
	1624101_at	FBgn0033978	Cyp6a23	3.06599	7.01055	24.058	3.26e-09	2.06e-05	10.9096	0.999982
	1633401_s_at	FBgn0050489	Cyp12d1-p	3.79848	7.04814	22.4947	5.78e-09	2.36e-05	10.527	0.999973
	1633401_s_at	FBgn0053503	Cyp12d1-d	3.79848	7.04814	22.4947	5.78e-09	2.36e-05	10.527	0.999973
	1635512_at	FBgn0039316	CG11893	4.13944	6.35937	22.2974	6.23e-09	2.36e-05	10.4753	0.999972
	1640755_at	FBgn0013772	Cyp6a8	5.28448	6.46108	21.5811	8.22e-09	2.6e-05	10.2812	0.999966
	1629771_at	FBgn0038680	Cyp12a5	1.6191	4.28761	20.7019	1.17e-08	2.77e-05	10.0278	0.999956
	1629308_at	FBgn0039472	CG17192	-2.90905	2.90592	-20.7072	1.17e-08	2.77e-05	10.0293	0.999956
	1630258_at	FBgn0010038	GstD2	6.05984	4.25942	19.4496	1.98e-08	3.96e-05	9.63474	0.999935
	1638080_at	FBgn0039315	CG13658	2.70392	2.8805	19.3173	2.1e-08	3.96e-05	9.59084	0.999932
	1639069_at	FBgn0053503	Cyp12d1-d	3.47765	6.98683	19.116	2.3e-08	3.96e-05	9.52316	0.999927
	1634815_at	FBgn0051104	CG31104	1.3584	6.42237	17.8279	4.14e-08	6.53e-05	9.06242	0.999884
	1623126_at	FBgn0035186	CG13912	-1.61808	2.59461	-17.6526	4.5e-08	6.55e-05	8.99581	0.999876
	1635008_at	FBgn0015039	Cyp9b2	2.67926	7.312	17.4604	4.93e-08	6.67e-05	8.92163	0.999867
	1624688_at	FBgn0030332	CG9360	3.05292	6.59201	17.0475	6.03e-08	7.32e-05	8.75813	0.999843
	1627844_at	FBgn0014469	Cyp4e2	1.97087	7.4526	16.9412	6.35e-08	7.32e-05	8.71511	0.999836
	1638903_at	FBgn0038082	CG5724	4.21352	4.51663	16.8751	6.57e-08	7.32e-05	8.68817	0.999831
	1638562_a_at	FBgn0038194	Cyp6d5	2.08171	8.475	16.757	6.97e-08	7.33e-05	8.6396	0.999823
	1624692_at	FBgn0037934	CG6830	2.51961	5.13622	16.4464	8.15e-08	8.13e-05	8.50952	0.999799
	1626324_at	FBgn0031432	Cyp309a1	1.65048	3.72952	16.3106	8.74e-08	8.28e-05	8.45155	0.999786
	1627080_at	FBgn0038718	CG17752	-1.1177	3.62572	-16.0506	1e-07	9.02e-05	8.33865	0.999761
	1626414_at	FBgn0010053	Jheh1	2.78271	6.58704	15.7036	1.2e-07	0.00010341	8.18385	0.999721
	1634143_at	FBgn0033065	Cyp6w1	3.7566	7.34306	15.5878	1.28e-07	0.000105231	8.13113	0.999706
	1641481_at	FBgn0040256	Ugt86Dd	2.92368	7.71188	15.4365	1.39e-07	0.000109414	8.06144	0.999685
	1638053_at	FBgn0015037	Cyp4p1	1.41793	5.69479	15.2913	1.5e-07	0.000113668	7.99367	0.999663
	1625744_at	FBgn0063494	GstE6	1.24646	6.67199	14.6439	2.15e-07	0.000156796	7.68046	0.999538
	1633076_at	FBgn0259682	Jabba	-1.31687	4.00705	-14.5328	2.29e-07	0.000160874	7.62484	0.999512
	1633076_at	FBgn0259682	Jabba	-1.31687	4.00705	-14.5328	2.29e-07	0.000160874	7.62484	0.999512
	1624939_at	FBgn0033981	Cyp6a21	1.74698	4.5237	14.3573	2.54e-07	0.00016759	7.53587	0.999467
	1626401_at	FBgn0000473	Cyp6a2	3.50641	6.7098	14.3325	2.57e-07	0.00016759	7.52317	0.99946
	1629969_at	FBgn0037166	CG11426	1.38702	5.29489	14.2795	2.65e-07	0.00016759	7.49594	0.999445
	1640566_at	FBgn0033395	Cyp4p2	1.09191	2.38358	14.0783	2.98e-07	0.000182479	7.39139	0.999384
	1640109_at	FBgn0026755	Ugt37b1	1.55804	3.91735	13.735	3.66e-07	0.000216968	7.20841	0.99926
	1638508_at	FBgn0032381	Mal-B1	2.55607	2.43757	13.4025	4.49e-07	0.000257731	7.02554	0.999112
	1638775_at	FBgn0010241	Mdr50	2.36101	4.5531	13.1949	5.11e-07	0.000279033	6.90839	0.999002
	1635410_at	FBgn0035476	CG12766	1.3316	4.87662	13.141	5.28e-07	0.000279033	6.87763	0.99897
	1628449_at	FBgn0040257	Ugt86Dc	1.65685	1.83597	13.1354	5.3e-07	0.000279033	6.8744	0.998967
	1638361_at	FBgn0033774	CG12374	-2.4387	7.03491	-13.0331	5.65e-07	0.000289588	6.81553	0.998905
	1637129_at	FBgn0063497	GstE3	1.86866	7.16557	12.874	6.26e-07	0.000312033	6.72279	0.998798
	1630066_at	FBgn0027073	CG4302	1.24065	5.78318	12.7116	6.95e-07	0.000337568	6.62662	0.998677
	1622946_at	FBgn0037936	CG6908	3.88508	7.07704	12.667	7.15e-07	0.000338787	6.59997	0.998641
	1638226_at	FBgn0039326	CG10562	1.89066	5.65274	12.6129	7.41e-07	0.000340658	6.56747	0.998597
	1624156_at	FBgn0040259	Ugt86Da	1.60586	6.24515	12.5837	7.55e-07	0.000340658	6.54986	0.998572
	1633540_at	FBgn0043791	phu	-3.07215	1.67591	-12.4029	8.5e-07	0.000374788	6.43968	0.998406
	1625042_at	FBgn0051288	CG31288	2.31947	5.36139	12.1827	9.85e-07	0.000424292	6.30287	0.998172
	1626392_s_at	FBgn0011656	Mef2	3.08273	6.92284	12.1481	1.01e-06	0.000424638	6.28114	0.998132
	1640244_at	FBgn0053514	CG33514	1.54354	2.67409	11.9229	1.18e-06	0.000476147	6.13764	0.997845
	1637346_at	FBgn0053514	CG33514	1.54365	3.53532	11.9001	1.19e-06	0.000476147	6.12297	0.997813
	1637229_a_at	FBgn0036992	Hpd	0.870232	6.75303	11.8793	1.21e-06	0.000476147	6.10947	0.997783
	1634960_at	FBgn0038147	CCHa2	-0.931861	4.39401	-11.8555	1.23e-06	0.000476147	6.0941	0.997749
	1631688_at	FBgn0002641	mal	1.00025	2.62771	11.75	1.32e-06	0.000495275	6.02532	0.997589
	1623416_at	FBgn0053265	Muc68E	1.07414	3.39758	11.7409	1.33e-06	0.000495275	6.01937	0.997575
	1626394_at	FBgn0039778	Jon99Fi	-3.26142	3.85935	-11.6943	1.38e-06	0.000501822	5.98867	0.997499
	1629853_at	FBgn0040349	CG3699	0.856804	6.65426	11.471	1.61e-06	0.000570272	5.83993	0.997099
	1628353_at	FBgn0001149	GstD1	1.3292	9.278	11.4593	1.62e-06	0.000570272	5.83199	0.997076
	1641191_s_at	FBgn0040260	Ugt36Bc	1.65291	5.19703	11.2467	1.89e-06	0.00065207	5.68708	0.996622
	1629026_at	FBgn0002069	AspRS	0.915466	5.06263	11.2095	1.94e-06	0.000657914	5.66139	0.996534
	1623491_at	FBgn0032669	CG15155	-1.66493	4.31205	-11.0686	2.15e-06	0.000716361	5.56316	0.996178
	1635442_a_at	FBgn0025595	AkhR	-1.04801	4.38228	-11.0127	2.24e-06	0.000733491	5.52388	0.996026
	1635442_a_at	FBgn0025595	AkhR	-1.04801	4.38228	-11.0127	2.24e-06	0.000733491	5.52388	0.996026
	1623862_at	FBgn0002936	ninaA	0.823041	3.12755	10.9686	2.32e-06	0.000744919	5.49268	0.9959
	1623861_at	FBgn0000566	Eip55E	1.06714	4.18749	10.9045	2.43e-06	0.000768145	5.44708	0.99571
	1627773_a_at	FBgn0034405	Jheh2	1.94381	7.21089	10.8032	2.62e-06	0.000814844	5.37445	0.995388
	1629836_at	FBgn0040262	Ugt36Ba	1.69016	1.07422	10.6424	2.96e-06	0.000902989	5.25754	0.994819
	1640827_at	FBgn0031579	CG15422	0.795908	4.41065	10.6244	3e-06	0.000902989	5.24429	0.99475
	1624578_at	FBgn0030774	sphe	0.815114	3.88407	10.3849	3.61e-06	0.00105514	5.06624	0.993733
	1634551_at	FBgn0038074	Gnmt	1.80371	7.29845	10.3809	3.62e-06	0.00105514	5.0632	0.993714
	1634551_at	FBgn0038074	Gnmt	1.80371	7.29845	10.3809	3.62e-06	0.00105514	5.0632	0.993714
	1627180_at	FBgn0023541	Cyp4d14	2.11186	4.74913	10.2751	3.93e-06	0.00112839	4.98311	0.993194
	1641664_at	FBgn0039085	CG10170	0.704656	2.76514	10.2513	4e-06	0.00113245	4.96497	0.99307
	1628657_at	FBgn0063491	GstE9	0.697618	7.6522	10.0835	4.57e-06	0.00127391	4.83574	0.992122
	1634591_at	FBgn0039310	CG11878	1.19705	5.34142	10.0404	4.73e-06	0.00129925	4.80221	0.991855
	1636526_at	FBgn0036876	CG9451	-0.690082	5.5036	-9.91211	5.24e-06	0.00141965	4.70137	0.990999
	1634684_at	FBgn0036501	CG7272	1.50477	5.32785	9.8457	5.53e-06	0.00147694	4.64865	0.990516
	1634935_a_at	FBgn0033446	CG1648	-1.12162	8.18752	-9.78008	5.84e-06	0.00152201	4.59619	0.990011
	1628682_at	FBgn0036759	CG5577	0.803397	4.17632	9.77467	5.86e-06	0.00152201	4.59185	0.989968
	1641058_at	FBgn0035529	Fdx2	0.805465	5.46039	9.72452	6.11e-06	0.00155651	4.55149	0.989559
	1622960_at	FBgn0028381	Decay	0.743377	3.63231	9.71325	6.16e-06	0.00155651	4.54239	0.989464
	1636793_at	FBgn0011576	Cyp4d2	0.937869	4.26043	9.69816	6.24e-06	0.00155651	4.53018	0.989336
	1627890_at	FBgn0042206	GstD10	1.91925	2.12404	9.59047	6.82e-06	0.00167924	4.44253	0.988371
	1639943_at	FBgn0034628	Acox57D-p	1.63974	4.04202	9.55189	7.04e-06	0.00171174	4.41088	0.988001
	1630568_at	FBgn0054040	CG34040	1.7052	6.22034	9.43935	7.74e-06	0.00185701	4.31781	0.986846
	1630802_at	FBgn0039006	Cyp6d4	1.80895	3.47601	9.41328	7.91e-06	0.00186567	4.29609	0.986561
	1628581_at	FBgn0265185	CG44250	0.794382	4.17098	9.40415	7.97e-06	0.00186567	4.28847	0.98646
	1628581_at	FBgn0265186	CG44251	0.794382	4.17098	9.40415	7.97e-06	0.00186567	4.28847	0.98646
	1628581_at	FBgn0265186	CG44251	0.794382	4.17098	9.40415	7.97e-06	0.00186567	4.28847	0.98646
	1626248_at	FBgn0037973	CG18547	1.273	5.23949	9.29803	8.72e-06	0.00201642	4.19933	0.985216
	1623706_at	FBgn0031801	CG9498	1.5538	5.66491	9.23807	9.18e-06	0.00209597	4.14851	0.984457
	1628896_a_at	FBgn0038302	CG4210	0.660982	3.28804	9.22457	9.29e-06	0.00209597	4.13702	0.984281
	1623687_at	FBgn0030270	CG15199	-0.927376	2.67806	-9.20452	9.45e-06	0.00210727	4.11993	0.984014
	1630800_s_at	FBgn0054040	CG34040	1.74506	5.49137	9.05301	1.08e-05	0.00237444	3.98956	0.981828
	1634554_at	FBgn0010044	GstD8	0.871759	1.22185	8.93773	1.19e-05	0.0025823	3.88891	0.979943
	1636353_s_at	FBgn0037612	CG8112	1.32701	3.14591	8.92687	1.2e-05	0.0025823	3.87936	0.979754
	1624475_at	FBgn0086443	AsnRS	0.675962	4.00883	8.91814	1.21e-05	0.0025823	3.87168	0.979601
	1630212_at	FBgn0033204	CG2065	4.1377	4.18765	8.87242	1.26e-05	0.00265891	3.83132	0.978779
	1630503_at	FBgn0038349	AOX3	0.774239	6.28424	8.82455	1.32e-05	0.00274384	3.78885	0.977879
	1624569_at	FBgn0051087	CG31087	1.05964	2.04354	8.80314	1.34e-05	0.00276624	3.76978	0.977463
	1641280_at	FBgn0033366	Ance-4	1.04431	4.81541	8.76417	1.39e-05	0.00282429	3.73496	0.976683
	1631994_a_at	FBgn0263241	Mocs1	0.778196	2.80773	8.75582	1.4e-05	0.00282429	3.72748	0.976512
	1625053_at	FBgn0034480	CG16898	1.57899	5.47469	8.73814	1.42e-05	0.00283919	3.71161	0.976145
	1632802_at	FBgn0028424	JhI-26	0.650621	5.45122	8.72472	1.44e-05	0.00284366	3.69955	0.975862
	1624793_at	FBgn0010043	GstD7	2.79228	3.15691	8.48981	1.78e-05	0.0034834	3.48549	0.970272
	1637645_at	FBgn0029002	miple2	0.576872	2.65292	8.45353	1.84e-05	0.00356484	3.45193	0.969289
	1641125_at	FBgn0033215	Dgat2	1.93519	1.749	8.43059	1.88e-05	0.00360429	3.43064	0.968649
	1636510_a_at	FBgn0039114	Lsd-1	-0.806636	6.47293	-8.40264	1.93e-05	0.00366165	3.40463	0.967849
	1639359_at	FBgn0051974	CG31974	1.02501	5.04069	8.385	1.96e-05	0.0036798	3.38817	0.967333
	1624481_a_at	FBgn0263346	CG43427	0.655781	4.46184	8.37594	1.98e-05	0.0036798	3.3797	0.967064
	1636174_at	FBgn0038020	GstD9	1.06535	6.23184	8.27264	2.18e-05	0.00401265	3.28256	0.963826
	1641650_at	FBgn0261393	alpha-Est5	0.914565	3.19094	8.25268	2.22e-05	0.00404484	3.26366	0.963161
	1638742_at	FBgn0036110	Cpr67Fb	1.70222	4.56217	8.23733	2.25e-05	0.00404484	3.2491	0.962641
	1640400_at	FBgn0034290	CG5773	-0.878757	4.95453	-8.23356	2.26e-05	0.00404484	3.24552	0.962512
	1640505_at	FBgn0259682	Jabba	-0.834058	2.36146	-8.1991	2.34e-05	0.0041393	3.21272	0.96131
	1640505_at	FBgn0259682	Jabba	-0.834058	2.36146	-8.1991	2.34e-05	0.0041393	3.21272	0.96131
	1630740_at	FBgn0034663	CG4363	0.907336	7.77531	8.15229	2.44e-05	0.00428669	3.16797	0.959611
	1635487_at	FBgn0038463	CG3534	0.894088	4.79188	8.12937	2.5e-05	0.00434084	3.14596	0.958749
	1634641_a_at	FBgn0000406	Cyt-b5-r	0.849022	8.5818	8.11953	2.52e-05	0.00434181	3.13649	0.958373
	1634097_s_at	FBgn0038730	CG6300	1.78987	2.54497	8.10098	2.56e-05	0.00437934	3.11863	0.957655
	1634097_s_at	FBgn0038731	CG11659	1.78987	2.54497	8.10098	2.56e-05	0.00437934	3.11863	0.957655
	1634097_s_at	FBgn0038733	CG11407	1.78987	2.54497	8.10098	2.56e-05	0.00437934	3.11863	0.957655
	1639892_at	FBgn0024289	Sodh-1	1.33807	8.20383	8.05856	2.67e-05	0.00450564	3.07762	0.95596
	1623971_at	FBgn0031775	CG9150	0.752937	1.50141	8.05253	2.69e-05	0.00450564	3.07179	0.955714
	1624892_s_at	FBgn0039313	CG11892	-1.03555	6.55574	-8.03824	2.72e-05	0.00452771	3.05792	0.955123
	1624054_at	FBgn0036752	Adgf-A	0.908551	3.71172	8.0062	2.81e-05	0.00462859	3.02675	0.953768
	1641534_at	FBgn0039629	CG11842	0.942436	3.74336	7.95966	2.94e-05	0.00479934	2.98126	0.95172
	1630723_a_at	FBgn0033271	CG8708	1.01381	4.88335	7.94129	2.99e-05	0.00484359	2.96325	0.950886
	1626435_at	FBgn0028853	CG15263	1.17379	4.32252	7.87758	3.18e-05	0.00510912	2.90047	0.94787
	1633503_at	FBgn0037354	CG12171	0.663561	5.22245	7.83715	3.31e-05	0.00527015	2.8604	0.945854
	1639495_at	FBgn0015038	Cyp9b1	0.686341	1.75882	7.7766	3.51e-05	0.0055461	2.80004	0.942678
	1636634_a_at	FBgn0032456	MRP	1.10037	6.83415	7.70675	3.76e-05	0.00589312	2.72988	0.938767
	1633654_s_at	FBgn0266375	IP3K2	0.726635	5.42828	7.66055	3.94e-05	0.00611928	2.68317	0.936026
	1624756_at	FBgn0027572	CG5009	0.755098	4.94215	7.63112	4.06e-05	0.00620453	2.65329	0.934214
	1635446_at	FBgn0030929	CG15043	0.83396	4.93308	7.63037	4.06e-05	0.00620453	2.65253	0.934167
	1637444_s_at	FBgn0020385	pug	1.03363	6.14768	7.61525	4.12e-05	0.00621726	2.63713	0.933214
	1633206_at	FBgn0037230	Nepl11	0.713804	4.69362	7.61231	4.13e-05	0.00621726	2.63414	0.933027
	1639476_at	FBgn0030262	Vago	-0.709079	3.21828	-7.59405	4.21e-05	0.00628213	2.61551	0.931853
	1636474_at	FBgn0032373	Vha100-5	0.572388	3.34914	7.5121	4.57e-05	0.00676897	2.53141	0.926315
	1633803_at	FBgn0003076	Pgm1	0.614592	7.43737	7.46578	4.79e-05	0.00703911	2.48354	0.92298
	1641488_at	FBgn0035632	Ppat-Dpck	0.511404	3.32232	7.40869	5.08e-05	0.00740315	2.42416	0.918651
	1637422_at	FBgn0031538	CG3246	0.624396	4.63414	7.39167	5.17e-05	0.00747557	2.40639	0.917313
	1639819_at	FBgn0034276	Sardh	1.04817	1.21878	7.38136	5.22e-05	0.00749764	2.3956	0.916491
	1639819_at	FBgn0034276	Sardh	1.04817	1.21878	7.38136	5.22e-05	0.00749764	2.3956	0.916491
	1631969_at	FBgn0030331	CG15221	0.738375	0.922413	7.3504	5.39e-05	0.00765238	2.36314	0.913973
	1638182_at	FBgn0038083	CG5999	1.65715	1.67764	7.34679	5.41e-05	0.00765238	2.35935	0.913675
	1641647_at	FBgn0263200	Galt	0.546905	5.38764	7.32947	5.51e-05	0.00770456	2.34113	0.912227
	1637255_a_at	FBgn0015575	alpha-Est7	0.492329	7.03965	7.31868	5.57e-05	0.00770456	2.32977	0.911312
	1635868_at	FBgn0039471	CG6295	-1.56011	6.70126	-7.28559	5.76e-05	0.00789057	2.29482	0.908447
	1624181_at	FBgn0259834	out	0.973593	5.10451	7.27718	5.81e-05	0.00789057	2.28591	0.907704
	1637492_at	FBgn0010425	epsilonTry	-1.53091	6.11828	-7.27462	5.83e-05	0.00789057	2.2832	0.907476
	1638171_s_at	FBgn0031148	Cbs	0.618494	3.85697	7.25908	5.92e-05	0.00796187	2.26671	0.906082
	1630857_s_at	FBgn0024947	NTPase	0.86661	7.10118	7.23465	6.08e-05	0.00807151	2.24075	0.90385
	1628271_at	FBgn0031418	CG3609	0.664793	6.91863	7.23235	6.09e-05	0.00807151	2.2383	0.903636
	1636460_at	FBgn0035667	Jon65Ai	-1.88476	2.31324	-7.21573	6.2e-05	0.00815526	2.22059	0.902083
	1641318_at	FBgn0037687	CG8132	0.527393	4.08887	7.19684	6.32e-05	0.00826016	2.20042	0.900287
	1628659_at	FBgn0004512	Mdr49	0.774741	5.18282	7.18666	6.39e-05	0.0082913	2.18952	0.899305
	1629194_s_at	FBgn0000052	Pfas	1.02367	4.58852	7.15674	6.59e-05	0.00849683	2.15744	0.896362
	1638259_s_at	FBgn0027079	ValRS	0.620728	2.89233	7.14704	6.66e-05	0.00852564	2.14702	0.89539
	1641195_at	FBgn0038519	Prx3	0.501085	4.96124	7.12801	6.79e-05	0.0086394	2.12654	0.893456
	1633795_a_at	FBgn0032297	CG17124	-0.672848	6.38623	-7.1057	6.95e-05	0.0087393	2.10246	0.891142
	1628257_s_at	FBgn0035438	PHGPx	0.610251	7.28109	7.10442	6.96e-05	0.0087393	2.10108	0.891008
	1638424_at	FBgn0039312	CG10514	-0.887673	6.25319	-7.08114	7.14e-05	0.00889773	2.07589	0.888537
	1623769_at	FBgn0030968	CG7322	0.933519	5.49426	7.06939	7.23e-05	0.00890263	2.06315	0.887269
	1634152_at	FBgn0010041	GstD5	2.06839	3.8035	7.06359	7.27e-05	0.00890263	2.05685	0.886638
	1624895_at	FBgn0037090	Est-Q	0.728025	4.51392	7.06213	7.28e-05	0.00890263	2.05527	0.886479
	1629222_at	FBgn0014455	Ahcy	0.690076	5.16333	7.05511	7.34e-05	0.00891161	2.04764	0.885709
	1636888_a_at	FBgn0016123	Alp4	-0.56275	5.55718	-6.98637	7.89e-05	0.00952614	1.97264	0.877895
	1634623_a_at	FBgn0033302	Cyp6a14	3.43267	4.12463	6.9735	8e-05	0.00959682	1.95853	0.876374
	1628320_at	FBgn0037749	CG9471	0.51445	5.53154	6.95205	8.19e-05	0.00975777	1.93497	0.873798
	1627288_a_at	FBgn0261714	Cpn	0.89276	4.71969	6.89899	8.67e-05	0.0102652	1.87644	0.867201
	1636703_at	FBgn0028899	CG31817	-0.447602	4.49267	-6.87085	8.93e-05	0.0105158	1.84524	0.863567
	1639660_s_at	FBgn0039321	CG10550	1.22263	5.73906	6.85556	9.08e-05	0.010625	1.82825	0.861554
	1631873_at	FBgn0040342	CG3706	0.724791	1.0265	6.83509	9.29e-05	0.0107966	1.80545	0.858811
	1639424_at	FBgn0036262	CG6910	0.951859	7.08295	6.82927	9.34e-05	0.0107986	1.79897	0.858023
	1635227_at	FBgn0001258	Ldh	0.536418	5.38813	6.82165	9.42e-05	0.0108223	1.79046	0.856984
	1632343_at	FBgn0020764	Alas	0.574366	7.07936	6.80608	9.58e-05	0.0108758	1.77306	0.854837
	1624342_at	FBgn0034295	CG10911	0.723728	7.33597	6.8043	9.6e-05	0.0108758	1.77107	0.854591
	1634041_at	FBgn0051548	CG31548	0.622804	4.67325	6.79649	9.68e-05	0.0108758	1.76233	0.853501
	1625265_at	FBgn0035189	CG9119	1.0602	6.28644	6.79508	9.7e-05	0.0108758	1.76075	0.853303
	1624993_at	FBgn0034664	CG4377	0.782648	6.02058	6.78961	9.76e-05	0.0108764	1.75462	0.852535
	1629396_a_at	FBgn0264953	Piezo	-0.639836	2.82862	-6.77414	9.92e-05	0.0109429	1.73726	0.850339
	1628364_at	FBgn0028532	CG7968	1.05866	4.08268	6.77329	9.93e-05	0.0109429	1.73631	0.850218
	1636382_at	FBgn0033777	CG17574	0.565391	6.04817	6.75789	0.000100997	0.0110501	1.719	0.848
	1640107_at	FBgn0031097	obst-A	-0.780102	2.54152	-6.75378	0.000101452	0.0110501	1.71438	0.847403
	1630574_at	FBgn0034871	CG3906	0.443233	6.59017	6.72822	0.000104331	0.0112633	1.68557	0.84364
	1630741_s_at	FBgn0037906	PGRP-LB	0.839013	2.81754	6.72589	0.000104598	0.0112633	1.68294	0.843294
	1627464_at	FBgn0002569	Mal-A2	0.880725	5.3717	6.71141	0.000106274	0.0113791	1.66657	0.841118
	1632021_at	FBgn0033980	Cyp6a20	0.576	5.99758	6.66612	0.000111706	0.0118425	1.61522	0.834135
	1624732_at	FBgn0063495	GstE5	1.03115	3.9117	6.66495	0.000111851	0.0118425	1.61388	0.83395
	1630593_at	FBgn0053126	NLaz	0.536481	6.56809	6.65777	0.000112741	0.0118704	1.60572	0.832816
	1641454_at	FBgn0030558	CG1461	0.539852	6.44593	6.64269	0.000114636	0.0119736	1.58854	0.830411
	1635137_a_at	FBgn0036211	CG5946	0.48697	6.45045	6.63994	0.000114985	0.0119736	1.58541	0.829969
	1628800_at	FBgn0250815	Jon65Aiv	-0.870613	8.93734	-6.6272	0.000116619	0.0120774	1.57087	0.827907
	1623256_at	FBgn0034335	GstE1	0.936745	6.43514	6.59712	0.000120579	0.0124196	1.53645	0.822947
	1633520_at	FBgn0052027	lncRNA:CR32027	1.78314	1.39348	6.58789	0.000121823	0.01248	1.52586	0.8214
	1637385_a_at	FBgn0037230	Nepl11	0.615268	4.78913	6.57574	0.000123483	0.0125819	1.51191	0.819344
	1626350_at	FBgn0015569	alpha-Est10	0.895417	3.54967	6.55078	0.00012697	0.0128681	1.48319	0.815054
	1629518_at	FBgn0032864	CG2493	0.679223	4.09727	6.52568	0.000130585	0.0131116	1.45423	0.810649
	1637872_at	FBgn0014031	Spat	0.660045	5.67235	6.52451	0.000130756	0.0131116	1.45288	0.810441
	1633885_s_at	FBgn0037955	CG6950	0.407289	4.92025	6.48934	0.000136022	0.0135678	1.41214	0.804103
	1637067_at	FBgn0039486	CAH9	-0.461122	3.64178	-6.4696	0.000139079	0.0137819	1.3892	0.800464
	1636973_at	FBgn0038257	smp-30	0.726753	2.38186	6.46614	0.000139622	0.0137819	1.38517	0.79982
	1635593_at	FBgn0034756	Cyp6d2	0.667899	2.43773	6.45671	0.000141114	0.013857	1.3742	0.798058
	1634699_a_at	FBgn0033564	Pex6	0.972366	5.10324	6.40014	0.000150446	0.0146421	1.30808	0.787191
	1634699_a_at	FBgn0061356	CG18003	0.972366	5.10324	6.40014	0.000150446	0.0146421	1.30808	0.787191
	1632500_at	FBgn0035695	CG10226	0.880699	4.43696	6.39893	0.000150654	0.0146421	1.30665	0.786952
	1632584_at	FBgn0035154	hiro	0.729217	4.66904	6.37072	0.000155565	0.0150422	1.27351	0.781343
	1640488_a_at	FBgn0032076	Argl	0.797752	6.54962	6.35476	0.000158421	0.0151835	1.25472	0.778116
	1640488_a_at	FBgn0032077	CG9515	0.797752	6.54962	6.35476	0.000158421	0.0151835	1.25472	0.778116
	1640549_at	FBgn0023477	Taldo	0.684289	7.3127	6.35346	0.000158656	0.0151835	1.25318	0.777851
	1633492_at	FBgn0040211	hgo	0.86774	3.99071	6.3492	0.00015943	0.0151835	1.24816	0.776981
	1629790_at	FBgn0036334	CG11267	0.496491	5.6744	6.34465	0.000160261	0.0151863	1.24278	0.776048
	1633047_at	FBgn0033423	Alp6	0.793361	2.49795	6.30692	0.000167333	0.0157776	1.19815	0.768196
	1627910_s_at	FBgn0037607	CG8036	0.51245	7.8742	6.29349	0.000169933	0.0159434	1.18221	0.765346
	1638325_at	FBgn0001208	Hn	0.705807	6.57433	6.28393	0.000171809	0.01604	1.17087	0.763302
	1623510_at	FBgn0035252	CG7970	0.519724	5.45826	6.27456	0.000173672	0.0161345	1.15971	0.761281
	1631234_at	FBgn0035265	PIG-Wb	0.725242	3.58458	6.24436	0.000179823	0.0165524	1.12372	0.754678
	1634662_at	FBgn0038236	Cyp313a1	-0.556137	5.76529	-6.24391	0.000179917	0.0165524	1.12318	0.754578
	1624583_at	FBgn0040985	CG6115	0.413855	7.27958	6.2331	0.000182179	0.0166333	1.11026	0.752178
	1635379_at	FBgn0051300	CG31300	0.804294	4.71112	6.23133	0.000182552	0.0166333	1.10814	0.751783
	1633639_at	FBgn0031689	Cyp28d1	1.03562	6.49663	6.21447	0.000186149	0.0168586	1.08796	0.747997
	1641412_at	FBgn0051809	CG31809	1.64319	2.03231	6.21144	0.000186804	0.0168586	1.08433	0.747312
	1634019_at	FBgn0033205	CG2064	1.49563	4.4915	6.20601	0.000187982	0.0168845	1.07782	0.746082
	1630003_at	FBgn0033221	CG12825	0.608821	5.22549	6.19635	0.000190102	0.016932	1.06622	0.743877
	1626061_at	FBgn0265194	Trpm	-0.448582	1.92679	-6.19191	0.000191084	0.016932	1.06089	0.74286
	1626768_at	FBgn0038854	CG7044	0.859072	1.95116	6.19143	0.00019119	0.016932	1.06031	0.74275
	1632652_s_at	FBgn0050022	CG30022	0.675926	4.21906	6.17241	0.000195464	0.0171349	1.03744	0.738356
	1639196_at	FBgn0031654	Jon25Bii	-2.69932	4.61555	-6.17185	0.000195593	0.0171349	1.03676	0.738224
	1625603_at	FBgn0039137	CG13604	1.47066	2.11811	6.16696	0.000196709	0.0171349	1.03087	0.737085
	1637847_at	FBgn0262782	Mdh1	0.451764	8.66117	6.16303	0.000197611	0.0171349	1.02613	0.736165
	1623521_at	FBgn0261575	tobi	0.863936	7.49871	6.16133	0.000198003	0.0171349	1.02408	0.735767
	1631106_s_at	FBgn0027086	IleRS	0.432438	3.93677	6.1564	0.000199144	0.0171553	1.01814	0.73461
	1640960_at	FBgn0039773	CG2224	-0.423567	3.90495	-6.14908	0.000200852	0.0172242	1.0093	0.732883
	1633523_at	FBgn0036271	Pbgs	0.634659	3.36017	6.13349	0.000204541	0.0174616	0.990457	0.729178
	1628032_a_at	FBgn0051092	LpR2	0.48174	5.7725	6.12112	0.000207521	0.0175762	0.975486	0.726212
	1630635_s_at	FBgn0038652	CG7720	-0.67288	4.74018	-6.12022	0.000207739	0.0175762	0.974397	0.725995
	1636217_at	FBgn0040513	kappaB-Ras	0.595448	5.53043	6.09798	0.000213225	0.01783	0.947411	0.720594
	1636217_at	FBgn0050503	CG30503	0.595448	5.53043	6.09798	0.000213225	0.01783	0.947411	0.720594
	1625402_at	FBgn0040261	Ugt36Bb	2.08052	1.23545	6.09707	0.000213451	0.01783	0.946314	0.720373
	1629070_at	FBgn0037386	CG1208	0.917295	4.79978	6.09414	0.000214187	0.01783	0.942751	0.719655
	1627986_s_at	FBgn0033327	PGRP-SC1b	-1.09814	2.84814	-6.08916	0.000215444	0.01783	0.93669	0.718431
	1627986_s_at	FBgn0043576	PGRP-SC1a	-1.09814	2.84814	-6.08916	0.000215444	0.01783	0.93669	0.718431
	1635987_at	FBgn0030041	CG12116	-0.476244	6.1376	-6.08684	0.000216032	0.01783	0.933871	0.71786
	1632637_at	FBgn0030600	hiw	-0.56402	2.0387	-6.08428	0.000216681	0.01783	0.930765	0.71723
	1640489_at	FBgn0267408	AOX1	0.591438	5.45549	6.08176	0.000217325	0.01783	0.927693	0.716607
	1636154_at	FBgn0050090	CG30090	-0.513776	1.84279	-6.07569	0.000218882	0.0178804	0.920297	0.715103
	1632575_at	FBgn0085205	CG34176	0.594707	4.52668	6.0707	0.000220169	0.0179083	0.914229	0.713865
	1634939_at	FBgn0032810	CG13077	0.573166	2.6135	6.05869	0.000223304	0.0180857	0.899585	0.710864
	1631588_at	FBgn0004654	Pgd	0.399593	5.28967	6.03956	0.000228401	0.0184198	0.876207	0.706036
	1631588_at	FBgn0023507	D2hgdh	0.399593	5.28967	6.03956	0.000228401	0.0184198	0.876207	0.706036
	1624506_at	FBgn0031653	Jon25Biii	-0.904612	6.80625	-6.03514	0.000229596	0.0184378	0.870801	0.704912
	1629606_at	FBgn0035169	Dci	0.491194	3.94418	6.02028	0.000233665	0.0186853	0.852604	0.701113
	1630206_at	FBgn0029091	Chs2	-0.538743	1.94804	-6.01615	0.000234809	0.0186979	0.847546	0.700052
	1627533_at	FBgn0261041	stj	-0.475258	3.09649	-5.99531	0.000240679	0.0190852	0.82196	0.694652
	1623839_at	FBgn0032287	CG6415	0.680356	3.70697	5.98772	0.000242859	0.0191778	0.812618	0.692667
	1635099_at	FBgn0038467	AdSL	0.969443	1.43269	5.98101	0.000244802	0.0192509	0.804363	0.690907
	1635099_at	FBgn0038467	AdSL	0.969443	1.43269	5.98101	0.000244802	0.0192509	0.804363	0.690907
	1631637_a_at	FBgn0015623	Cpr	0.487818	8.64352	5.96918	0.00024827	0.0193742	0.789783	0.687785
	1629181_at	FBgn0053494	CG33494	-0.855079	4.51276	-5.96869	0.000248413	0.0193742	0.789185	0.687656
	1638285_a_at	FBgn0025592	Gk1	0.507587	5.55525	5.95511	0.000252465	0.0195406	0.772418	0.684044
	1624195_at	FBgn0033782	sug	-0.988278	4.13216	-5.95463	0.000252609	0.0195406	0.771826	0.683916
	1632114_at	FBgn0038681	Cyp12a4	0.504833	6.07217	5.9375	0.000257822	0.0198627	0.750656	0.679322
	1631420_at	FBgn0030594	fiz	0.91845	6.97321	5.91954	0.000263416	0.0201751	0.728404	0.674455
	1638687_at	FBgn0058298	CG40298	-0.477628	0.817596	-5.91276	0.000265563	0.0201751	0.719987	0.672604
	1632688_s_at	FBgn0035484	CG11594	0.674062	4.97165	5.91252	0.000265639	0.0201751	0.71969	0.672539
	1636572_at	FBgn0031464	Duox	-0.493431	1.57112	-5.91096	0.000266134	0.0201751	0.717759	0.672113
	1638120_at	FBgn0027547	CG1927	0.417535	5.30821	5.90182	0.000269064	0.0203159	0.706409	0.669607
	1641455_at	FBgn0030876	CG6762	0.38508	3.42219	5.89301	0.000271922	0.0204062	0.695452	0.667179
	1634714_at	FBgn0031114	cactin	0.516225	1.27668	5.89151	0.000272413	0.0204062	0.693584	0.666764
	1637649_at	FBgn0283450	Glo1	0.373397	5.5593	5.886	0.000274218	0.0204606	0.686734	0.66524
	1634594_at	FBgn0038009	CG17738	-0.571628	2.77132	-5.87736	0.00027708	0.020593	0.67597	0.662839
	1635251_at	FBgn0052553	lncRNA:CR32553	0.761921	1.81554	5.86856	0.000280028	0.0206547	0.664994	0.660381
	1627088_at	FBgn0038914	fit	-1.75969	3.86313	-5.86838	0.000280089	0.0206547	0.664767	0.66033
	1629955_at	FBgn0035933	CG13309	0.415783	5.60167	5.85212	0.000285626	0.0209814	0.644465	0.655762
	1622945_a_at	FBgn0027084	LysRS	0.477225	3.4391	5.83707	0.000290859	0.0212832	0.625637	0.6515
	1635937_at	FBgn0028519	hll	0.707869	0.704371	5.82921	0.000293631	0.0213092	0.615798	0.649262
	1623018_at	FBgn0033301	CG12780	0.780325	5.3239	5.82731	0.000294306	0.0213092	0.613417	0.64872
	1641487_a_at	FBgn0020653	Trxr-1	0.489344	6.84674	5.82652	0.000294587	0.0213092	0.612427	0.648494
	1639934_at	FBgn0051272	CG31272	1.03675	4.27801	5.81773	0.000297734	0.021455	0.601404	0.645977
	1626892_at	FBgn0086251	del	-0.392149	2.40876	-5.80785	0.000301317	0.0214971	0.588993	0.643134
	1637342_s_at	FBgn0010551	Phb2	0.426252	6.04306	5.80552	0.000302167	0.0214971	0.586073	0.642464
	1637342_s_at	FBgn0010551	Phb2	0.426252	6.04306	5.80552	0.000302167	0.0214971	0.586073	0.642464
	1623355_at	FBgn0003965	v	0.597347	3.11123	5.80533	0.000302237	0.0214971	0.585831	0.642408
	1636583_at	FBgn0036996	mag	-1.40492	4.82253	-5.80364	0.000302856	0.0214971	0.583708	0.64192
	1640355_at	FBgn0038484	CG5246	-0.897366	2.95999	-5.79962	0.000304334	0.0215214	0.57866	0.640759
	1628734_at	FBgn0037516	CG11286	-0.447428	4.7964	-5.78547	0.000309605	0.0218066	0.560843	0.636648
	1625164_at	FBgn0044810	TotX	-0.897544	5.17052	-5.78264	0.000310668	0.0218066	0.557288	0.635825
	1623775_at	FBgn0051089	CG31089	0.86606	0.581288	5.7727	0.000314443	0.0219379	0.544754	0.632918
	1629055_a_at	FBgn0001125	Got2	0.533837	8.47523	5.77163	0.000314854	0.0219379	0.543401	0.632603
	1640838_s_at	FBgn0027932	Akap200	-0.400419	5.61468	-5.76151	0.000318752	0.0221282	0.530632	0.629631
	1639322_at	FBgn0011554	etaTry	0.630097	2.09524	5.75688	0.000320554	0.022172	0.524784	0.628266
	1625995_a_at	FBgn0004057	Zw	0.378237	4.85879	5.72026	0.000335203	0.023041	0.478409	0.617372
	1637499_s_at	FBgn0032587	CG5953	0.696449	3.62468	5.71565	0.000337098	0.023041	0.472557	0.615989
	1625763_at	FBgn0031263	Tspo	0.484888	6.79892	5.71482	0.00033744	0.023041	0.471506	0.61574
	1640065_at	FBgn0063493	GstE7	0.804148	4.41357	5.71351	0.00033798	0.023041	0.469846	0.615347
	1630429_s_at	FBgn0039308	CG11889	0.585578	5.66076	5.68885	0.00034835	0.0236628	0.438477	0.607896
	1630429_s_at	FBgn0039309	CG11891	0.585578	5.66076	5.68885	0.00034835	0.0236628	0.438477	0.607896
	1635426_at	FBgn0034713	CG11291	-0.405723	5.90499	-5.67377	0.00035486	0.024019	0.419256	0.603305
	1625245_at	FBgn0032116	Mco1	0.675584	1.86018	5.66866	0.000357096	0.0240843	0.412735	0.601744
	1637064_at	FBgn0283494	Adk2	0.48296	6.11017	5.66467	0.000358852	0.0241169	0.407643	0.600522
	1639278_at	FBgn0028738	ETH	-0.519813	1.07578	-5.65667	0.000362399	0.0241732	0.397429	0.59807
	1628432_at	FBgn0039537	CG5590	0.467042	5.32548	5.65419	0.000363509	0.0241732	0.394255	0.597307
	1640249_at	FBgn0263748	CG43673	-0.613237	4.068	-5.65164	0.000364654	0.0241732	0.390989	0.596521
	1630632_s_at	FBgn0266570	NO66	0.464826	3.51444	5.65133	0.000364792	0.0241732	0.390598	0.596427
	1626689_at	FBgn0031182	Cyp6t1	0.938786	2.84194	5.64494	0.000367675	0.0241821	0.382423	0.594457
	1637799_at	FBgn0003257	r-l	-0.551109	2.42051	-5.64298	0.000368567	0.0241821	0.379908	0.593851
	1627423_at	FBgn0039156	CG6178	0.411498	4.28681	5.64257	0.000368754	0.0241821	0.379382	0.593724
	1628558_at	FBgn0050022	CG30022	0.584727	4.39013	5.62788	0.000375499	0.0245395	0.360559	0.589176
	1636183_at	FBgn0052198	CG32198	1.10622	2.22466	5.60742	0.000385118	0.0250817	0.334293	0.582804
	1634192_at	FBgn0050281	CG30281	-0.699798	0.563496	-5.58392	0.000396503	0.0257088	0.304038	0.575429
	1635724_at	FBgn0038658	CG14292	0.409487	7.6769	5.58045	0.000398215	0.0257088	0.299563	0.574336
	1632650_at	FBgn0027586	CG5867	-0.423399	6.7487	-5.57923	0.000398817	0.0257088	0.297994	0.573952
	1639480_at	FBgn0000261	Cat	0.388739	7.67136	5.56686	0.000404996	0.0259644	0.282026	0.570043
	1626734_at	FBgn0034247	CG6484	0.456816	6.07497	5.56474	0.000406063	0.0259644	0.279293	0.569373
	1626734_at	FBgn0035665	Jon65Aiii	0.456816	6.07497	5.56474	0.000406063	0.0259644	0.279293	0.569373
	1624158_at	FBgn0260763	CG42561	-0.412619	2.20104	-5.56099	0.000407959	0.0259644	0.274454	0.568186
	1623761_at	FBgn0030040	CG15347	0.463768	5.17089	5.55935	0.000408796	0.0259644	0.272326	0.567664
	1633425_at	FBgn0039873	Smvt	0.92021	5.63351	5.55771	0.000409632	0.0259644	0.270204	0.567143
	1623045_at	FBgn0025366	Ip259	0.353281	7.02953	5.54315	0.000417126	0.0263513	0.251371	0.562514
	1641681_s_at	FBgn0263199	Galk	0.899198	5.81589	5.52699	0.000425622	0.0267977	0.230426	0.557353
	1638074_at	FBgn0035906	GstO2	0.740518	3.53724	5.52436	0.000427021	0.0267977	0.227018	0.556512
	1637973_a_at	FBgn0030431	CG4407	0.463665	3.59119	5.51879	0.000430006	0.0268959	0.219783	0.554726
	1638498_s_at	FBgn0033188	Drat	-0.488759	6.10469	-5.51191	0.000433722	0.0270391	0.210843	0.552516
	1638498_s_at	FBgn0033188	Drat	-0.488759	6.10469	-5.51191	0.000433722	0.0270391	0.210843	0.552516
	1625889_at	FBgn0020910	RpL3	0.37652	1.87705	5.48222	0.000450161	0.0279417	0.172192	0.542942
	1625244_at	FBgn0031604	Elp3	0.41125	1.1255	5.48047	0.000451148	0.0279417	0.169916	0.542377
	1633773_s_at	FBgn0038475	Keap1	1.37571	2.36252	5.4713	0.000456378	0.0280142	0.157941	0.539403
	1637350_at	FBgn0051086	CG31086	0.683415	3.58271	5.47073	0.000456703	0.0280142	0.157201	0.53922
	1637350_at	FBgn0051323	CG31323	0.683415	3.58271	5.47073	0.000456703	0.0280142	0.157201	0.53922
	1635125_a_at	FBgn0027611	LManII	0.602713	5.95145	5.46629	0.000459258	0.0280142	0.151403	0.537779
	1636170_at	FBgn0039151	CG13607	-0.697481	3.50061	-5.46435	0.000460379	0.0280142	0.148871	0.537149
	1631834_at	FBgn0051098	CG31098	0.626468	2.40599	5.46256	0.000461419	0.0280142	0.146527	0.536566
	1627078_at	FBgn0034716	Oatp58Dc	0.495978	4.18474	5.46087	0.000462399	0.0280142	0.144322	0.536018
	1637291_at	FBgn0023550	FarO	0.379263	3.29086	5.46041	0.000462667	0.0280142	0.14372	0.535868
	1629207_at	FBgn0032350	CG6287	0.565242	7.30906	5.45307	0.000466958	0.028184	0.134126	0.533481
	1637037_at	FBgn0000053	Gart	1.55277	4.08727	5.43927	0.00047515	0.0285874	0.116055	0.528981
	1640978_at	FBgn0037126	CG14567	-0.593359	2.80191	-5.41503	0.000489918	0.0292351	0.0842475	0.521049
	1632623_at	FBgn0000406	Cyt-b5-r	0.519542	8.14916	5.41446	0.000490273	0.0292351	0.0834943	0.520861
	1641675_at	FBgn0003460	so	-0.54062	2.9809	-5.4132	0.000491052	0.0292351	0.0818436	0.520449
	1624763_at	FBgn0030396	CG2556	0.664321	3.9234	5.41154	0.000492085	0.0292351	0.0796592	0.519904
	1623933_at	FBgn0003380	Sh	-0.555004	2.78818	-5.40692	0.000494969	0.0293146	0.073586	0.518388
	1633684_at	FBgn0043783	CG32444	0.957044	8.34158	5.40362	0.000497043	0.0293457	0.0692412	0.517303
	1641722_at	FBgn0016715	Reg-2	0.675763	4.63797	5.38531	0.000508709	0.0299412	0.0451292	0.51128
	1625026_at	FBgn0040609	CG3348	-1.76748	4.76561	-5.37958	0.000512421	0.0300662	0.0375735	0.509392
	1627655_at	FBgn0050410	Rpi	0.391166	5.55148	5.36519	0.000521872	0.0305263	0.018576	0.504644
	1631148_at	FBgn0030775	CG9673	0.86325	5.28332	5.34836	0.000533173	0.0310914	-0.0036915	0.499077
	1640335_at	FBgn0261859	CG42788	-0.563941	3.85379	-5.3454	0.000535186	0.031113	-0.00760861	0.498098
	1636811_at	FBgn0032433	Oatp33Ea	0.697618	4.31609	5.34123	0.000538033	0.0311829	-0.0131243	0.496719
	1629347_at	FBgn0013469	klu	0.597369	1.87096	5.33491	0.000542387	0.0313394	-0.0215029	0.494624
	1637357_at	FBgn0032066	LManIII	1.91488	2.62866	5.33205	0.000544369	0.0313583	-0.0252936	0.493677
	1637027_s_at	FBgn0032801	CG10165	0.426255	4.05327	5.3185	0.000553871	0.031809	-0.0432825	0.489181
	1632222_a_at	FBgn0036428	Gbs-70E	-0.362135	7.91424	-5.28753	0.000576271	0.0329954	-0.084498	0.478888
	1632222_a_at	FBgn0036428	Gbs-70E	-0.362135	7.91424	-5.28753	0.000576271	0.0329954	-0.084498	0.478888
	1623840_at	FBgn0034429	AANATL4	-0.546955	0.588062	-5.2749	0.00058568	0.0334332	-0.101336	0.474688
	1628128_at	FBgn0036731	CG6333	-0.382139	5.82778	-5.27124	0.000588441	0.0334657	-0.106227	0.473468
	1624953_at	FBgn0036806	Cyp12c1	0.536727	3.23798	5.26947	0.000589782	0.0334657	-0.108592	0.472879
	1627144_at	FBgn0039325	CG10560	0.872456	7.4074	5.25233	0.000602921	0.0341092	-0.131501	0.467172
	1625613_at	FBgn0014427	CG11899	0.592686	4.45303	5.2431	0.000610134	0.0343148	-0.143865	0.464096
	1636948_a_at	FBgn0027088	GlyRS	0.382824	3.73147	5.24105	0.000611748	0.0343148	-0.146612	0.463412
	1635403_at	FBgn0003390	shf	-0.812079	3.62778	-5.24074	0.000611989	0.0343148	-0.147021	0.463311
	1640386_at	FBgn0004003	wbl	-0.386138	4.77071	-5.23244	0.000618578	0.034582	-0.158157	0.460543
	1623605_a_at	FBgn0043364	cbt	-0.447605	6.35181	-5.22983	0.000620664	0.0345966	-0.161657	0.459673
	1636423_at	FBgn0040832	CG8012	-0.323823	5.7618	-5.22724	0.000622744	0.0346107	-0.165136	0.45881
	1629358_s_at	FBgn0032075	Tsp29Fb	0.422424	6.56815	5.21804	0.000630184	0.0348347	-0.177485	0.455745
	1634650_at	FBgn0031213	galectin	0.424304	5.30855	5.21771	0.00063045	0.0348347	-0.177923	0.455636
	1638110_at	FBgn0267429	CG45782	-0.376909	3.52225	-5.2108	0.000636104	0.03498	-0.187206	0.453335
	1636740_at	FBgn0011768	Fdh	0.365492	6.08301	5.20906	0.000637537	0.03498	-0.189546	0.452755
	1633233_a_at	FBgn0028476	Usp1	-0.490926	2.57464	-5.20775	0.000638618	0.03498	-0.191308	0.452318
	1638661_at	FBgn0040060	yip7	-0.584006	8.59125	-5.19774	0.000646946	0.0353341	-0.20478	0.448983
	1627869_at	FBgn0020906	Jon25Bi	-1.81391	5.43558	-5.18056	0.000661516	0.036026	-0.227938	0.443261
	1638592_at	FBgn0038916	dnd	-0.485162	3.01646	-5.17429	0.00066692	0.0362162	-0.236398	0.441174
	1639803_at	FBgn0036576	CG5151	-0.582394	3.11049	-5.17116	0.000669636	0.0362599	-0.240626	0.440132
	1639803_at	FBgn0052152	CG32152	-0.582394	3.11049	-5.17116	0.000669636	0.0362599	-0.240626	0.440132
	1631806_at	FBgn0033294	Mal-A4	1.25983	4.79973	5.1669	0.000673346	0.0363568	-0.24637	0.438717
	1626253_at	FBgn0010040	GstD4	0.337817	0.30983	5.16369	0.000676165	0.0364053	-0.250714	0.437648
	1627448_at	FBgn0033428	Updo	0.405005	5.13482	5.15431	0.000684462	0.0367476	-0.263396	0.434529
	1625589_at	FBgn0086757	cbs	-0.318261	2.79266	-5.14541	0.000692437	0.0370708	-0.275443	0.431571
	1628013_at	FBgn0031417	CG3597	0.545983	4.46839	5.14255	0.000695023	0.0371044	-0.27932	0.430621
	1633191_at	FBgn0036519	CG7650	-0.422321	3.01525	-5.13966	0.000697641	0.0371396	-0.283229	0.429662
	1638693_s_at	FBgn0033226	CG1882	0.747888	6.5151	5.12638	0.000709831	0.0376827	-0.301244	0.425254
	1634826_at	FBgn0033863	CG13337	-0.374637	5.23766	-5.11708	0.000718503	0.0380365	-0.313871	0.42217
	1636885_at	FBgn0038450	CG17560	0.524036	6.34461	5.10937	0.000725776	0.0383145	-0.324345	0.419617
	1638078_at	FBgn0032741	Sidpn	-0.373994	3.77897	-5.0923	0.000742175	0.038922	-0.347581	0.413969
	1638040_at	FBgn0004647	N	-0.455498	2.00279	-5.09135	0.0007431	0.038922	-0.348876	0.413655
	1630892_at	FBgn0034488	Hacl	0.31953	3.8888	5.09058	0.000743844	0.038922	-0.349917	0.413403
	1640379_s_at	FBgn0085453	Mthfs	0.561342	5.26533	5.08703	0.000747314	0.038922	-0.354757	0.412229
	1625837_at	FBgn0039031	Gbp3	0.419053	5.07793	5.08679	0.000747552	0.038922	-0.35509	0.412149
	1631461_at	FBgn0052061	CG32061	-0.358611	6.26216	-5.07783	0.000756384	0.0392586	-0.367303	0.409193
	1629732_at	FBgn0033234	MFS12	-0.704563	2.1466	-5.07551	0.000758694	0.0392586	-0.370475	0.408426
	1627516_at	FBgn0037935	CG6834	0.389019	4.10957	5.07396	0.000760232	0.0392586	-0.372581	0.407918
	1628133_at	FBgn0032473	kmg	0.332004	1.93881	5.06954	0.00076466	0.0393046	-0.378622	0.406459
	1627097_at	FBgn0051858	t-cup	-0.335962	5.88006	-5.06816	0.000766043	0.0393046	-0.3805	0.406006
	1633814_at	FBgn0029866	CG3842	0.550045	2.55349	5.06687	0.000767344	0.0393046	-0.382266	0.405581
	1628081_s_at	FBgn0038256	CG7530	0.420737	6.61802	5.05655	0.000777826	0.0397341	-0.396376	0.402183
	1627060_s_at	FBgn0010225	Gel	0.398395	6.64078	5.03411	0.000801148	0.0408155	-0.427099	0.394819
	1630009_at	FBgn0033498	CG12209	-0.351089	4.85261	-5.03057	0.000804895	0.0408965	-0.431953	0.39366
	1628969_s_at	FBgn0033915	CG8485	-0.440701	4.8392	-5.02743	0.000808235	0.0409563	-0.436259	0.392633
	1628328_at	FBgn0063499	GstE10	-0.483298	3.05215	-5.02315	0.000812808	0.040969	-0.442127	0.391234
	1639454_at	FBgn0034296	CG10912	0.998257	5.24189	5.01756	0.000818838	0.0411634	-0.449814	0.389405
	1626482_a_at	FBgn0031139	CG11227	-0.415818	3.43748	-5.01264	0.000824172	0.041322	-0.456567	0.387801
	1623060_at	FBgn0030494	Cpr12A	-0.312858	0.55568	-5.00855	0.000828635	0.0414361	-0.462184	0.386468
	1629061_s_at	FBgn0001223	Hsp22	1.29328	3.8002	5.00285	0.000834912	0.0416401	-0.470031	0.384609
	1629061_s_at	FBgn0001228	CG4456	1.29328	3.8002	5.00285	0.000834912	0.0416401	-0.470031	0.384609
	1630515_s_at	FBgn0001114	Glt	0.486729	5.55138	4.99855	0.000839676	0.0417678	-0.475949	0.383209
	1624083_s_at	FBgn0005278	Sam-S	0.554345	7.83891	4.99416	0.000844566	0.0419011	-0.481989	0.381783
	1630715_at	FBgn0037037	CG10588	-0.417155	2.71764	-4.98969	0.000849582	0.0420399	-0.488147	0.38033
	1633446_s_at	FBgn0036945	Ssk	0.352506	5.30589	4.97928	0.000861377	0.0424988	-0.502486	0.376957
	1631154_at	FBgn0033787	CG13321	0.587465	4.73128	4.97718	0.000863785	0.0424988	-0.505389	0.376275
	1640405_at	FBgn0010497	dmGlut	-0.606573	5.01407	-4.97561	0.000865584	0.0424988	-0.507553	0.375767
	1634511_at	FBgn0053125	CG33125	-0.397919	5.11386	-4.97115	0.000870722	0.0426406	-0.513708	0.374325
	1630147_at	FBgn0001187	Hex-C	0.437838	6.07716	4.96874	0.000873519	0.0426674	-0.517044	0.373544
	1625374_at	FBgn0032068	LManV	1.41274	5.24005	4.95851	0.000885468	0.0431398	-0.531174	0.370243
	1632098_at	FBgn0032138	CG4364	0.329352	5.42941	4.95587	0.000888576	0.0431802	-0.534818	0.369394
	1634482_at	FBgn0030823	TTLL1A	-0.337607	3.38818	-4.94934	0.000896326	0.0432989	-0.54385	0.367293
	1626881_at	FBgn0038466	CG8907	0.491917	2.95417	4.9484	0.000897451	0.0432989	-0.545154	0.36699
	1636764_at	FBgn0051075	CG31075	0.514542	4.46038	4.94805	0.000897872	0.0432989	-0.545642	0.366876
	1631817_a_at	FBgn0001124	Got1	0.351155	8.52689	4.9434	0.00090344	0.0434568	-0.552071	0.365384
	1637982_at	FBgn0016687	Nurf-38	0.378774	6.84199	4.92328	0.00092799	0.0445247	-0.579955	0.358943
	1635450_a_at	FBgn0038257	smp-30	0.866018	7.44389	4.91114	0.000943162	0.0451384	-0.59682	0.355071
	1627845_at	FBgn0035906	GstO2	0.410099	5.83876	4.90166	0.000955183	0.0454955	-0.609991	0.352061
	1641038_at	FBgn0046302	CG10650	0.379788	5.70887	4.9009	0.00095616	0.0454955	-0.611055	0.351819
	1638583_at	FBgn0051103	CG31103	-0.536529	2.74847	-4.8996	0.000957826	0.0454955	-0.612866	0.351406
	1623055_at	FBgn0028513	CG9254	-0.315376	7.95434	-4.89102	0.000968876	0.0459053	-0.624794	0.348692
	1633512_at	FBgn0019650	toy	-0.355234	3.22453	-4.87235	0.000993433	0.0469515	-0.650824	0.342804
	1623903_at	FBgn0037683	CG18473	0.574463	3.1254	4.86571	0.00100232	0.0472537	-0.660087	0.34072
	1626718_at	FBgn0053127	CG33127	0.52794	5.46992	4.86213	0.00100715	0.0473633	-0.665081	0.339599
	1640486_s_at	FBgn0038603	PKD	-0.340425	4.04107	-4.85989	0.00101019	0.0473888	-0.668218	0.338896
	1625465_a_at	FBgn0038924	CG6028	0.547569	5.97142	4.84597	0.00102927	0.0480459	-0.687674	0.334551
	1630528_at	FBgn0038717	CG17751	-0.567685	1.71921	-4.8265	0.00105662	0.0492017	-0.714951	0.328506
	1626308_s_at	FBgn0034885	Eglp4	0.384981	6.76156	4.82243	0.00106243	0.0493508	-0.72065	0.32725
	1633498_at	FBgn0035871	BI-1	-0.317411	6.32731	-4.81871	0.00106777	0.0494302	-0.725871	0.326101
	1630153_a_at	FBgn0037464	CG1988	-0.367948	6.64403	-4.81762	0.00106935	0.0494302	-0.727406	0.325764
	1623675_at	FBgn0039682	Obp99c	-0.927908	6.67803	-4.81521	0.00107284	0.0494705	-0.730787	0.325022
	1635149_at	FBgn0052117	CG32117	-0.354505	4.79056	-4.79684	0.0010998	0.0505909	-0.756601	0.319385
	1625598_at	FBgn0051326	CG31326	0.470226	5.51491	4.79206	0.00110693	0.0507956	-0.763321	0.317926
	1639683_at	FBgn0050110	CG30110	-0.475474	3.94421	-4.78496	0.00111762	0.0510011	-0.773317	0.315762
	1633434_at	FBgn0033904	CG18327	-0.649362	2.80508	-4.78379	0.00111939	0.0510011	-0.774957	0.315408
	1630027_s_at	FBgn0053113	Rtnl1	-0.373422	7.80745	-4.78373	0.00111948	0.0510011	-0.775046	0.315389
	1623901_s_at	FBgn0038947	Sar1	0.342862	7.62035	4.77662	0.00113032	0.0512659	-0.785062	0.31323
	1631227_at	FBgn0038858	CG5793	0.456306	6.37499	4.77637	0.00113071	0.0512659	-0.785418	0.313153
	1641025_at	FBgn0030518	CG11134	0.331754	4.6109	4.77256	0.00113656	0.0514084	-0.790788	0.312
	1624149_at	FBgn0035598	CG4669	-0.356963	7.90829	-4.76927	0.00114164	0.0515154	-0.795428	0.311004
	1630173_a_at	FBgn0266375	IP3K2	0.456827	3.56682	4.76209	0.00115282	0.0518962	-0.805559	0.308838
	1630173_a_at	FBgn0266375	IP3K2	0.456827	3.56682	4.76209	0.00115282	0.0518962	-0.805559	0.308838
	1638642_at	FBgn0031497	SerRS	0.450236	3.73134	4.74966	0.00117245	0.0526548	-0.823114	0.305103
	1636176_at	FBgn0004926	eIF2beta	0.330524	5.96731	4.74093	0.00118646	0.0530844	-0.835459	0.302492
	1631313_at	FBgn0014930	CG2846	0.464973	4.49464	4.73869	0.00119008	0.0530844	-0.83863	0.301823
	1630589_at	FBgn0037890	CG17734	-0.382605	4.73353	-4.73848	0.00119042	0.0530844	-0.838929	0.30176
	1636395_at	FBgn0032069	LManVI	1.4683	4.77369	4.73379	0.00119805	0.0532993	-0.845572	0.300363
	1639101_at	FBgn0037635	CG9837	-0.667541	2.69822	-4.72614	0.0012106	0.0536413	-0.856407	0.298091
	1624554_at	FBgn0040348	CG3703	0.483219	1.88997	4.7252	0.00121214	0.0536413	-0.857728	0.297814
	1631392_at	FBgn0039241	CG11089	1.02037	6.13563	4.72394	0.00121423	0.0536413	-0.859519	0.29744
	1631392_at	FBgn0043799	CG31381	1.02037	6.13563	4.72394	0.00121423	0.0536413	-0.859519	0.29744
	1625362_at	FBgn0040319	Gclc	0.429874	5.92399	4.71869	0.00122296	0.0538529	-0.866966	0.295886
	1625669_at	FBgn0028902	Tektin-A	-0.362066	6.69956	-4.71725	0.00122536	0.0538529	-0.869007	0.295461
	1634171_at	FBgn0031026	CG12231	-0.33936	2.52948	-4.71087	0.00123606	0.0541014	-0.878047	0.293583
	1639019_s_at	FBgn0053470	CG33470	0.639403	6.10392	4.69694	0.00125983	0.0550144	-0.897843	0.289494
	1639019_s_at	FBgn0283462	IMPPP	0.639403	6.10392	4.69694	0.00125983	0.0550144	-0.897843	0.289494
	1638174_at	FBgn0035360	CG1246	0.385015	3.0089	4.69313	0.0012664	0.055104	-0.903255	0.288382
	1640961_at	FBgn0052313	CG32313	-0.39463	5.57208	-4.69238	0.00126769	0.055104	-0.904314	0.288165
	1640227_at	FBgn0028473	Non1	0.370051	5.87167	4.68527	0.00128009	0.0555155	-0.914432	0.286094
	1640227_at	FBgn0028473	Non1	0.370051	5.87167	4.68527	0.00128009	0.0555155	-0.914432	0.286094
	1635552_s_at	FBgn0051472	sgll	0.396728	4.99199	4.67506	0.00129811	0.0561685	-0.928963	0.283135
	1636314_at	FBgn0010438	mtSSB	0.390795	1.85926	4.66931	0.0013084	0.0563967	-0.937169	0.281472
	1633134_at	FBgn0050099	CG30099	-0.327866	4.35046	-4.66878	0.00130934	0.0563967	-0.937913	0.281322
	1633147_at	FBgn0032839	AANATL3	0.685929	2.02667	4.66028	0.0013247	0.056719	-0.95004	0.278877
	1634659_at	FBgn0260632	dl	-0.369202	0.406755	-4.6595	0.00132611	0.056719	-0.951146	0.278654
	1638808_at	FBgn0024980	Syx4	-0.375077	3.08549	-4.65936	0.00132638	0.056719	-0.951356	0.278612
	1639500_at	FBgn0085424	nub	0.515911	3.24586	4.65803	0.00132879	0.056719	-0.953245	0.278233
	1634314_s_at	FBgn0038922	Idh3b	0.324569	8.06625	4.65537	0.00133365	0.0567986	-0.957041	0.277471
	1634728_at	FBgn0034383	CG17821	-0.30886	3.56114	-4.65335	0.00133737	0.056829	-0.959932	0.276892
	1636976_at	FBgn0032253	LManI	0.991891	1.99515	4.65019	0.00134319	0.0569488	-0.964449	0.275988
	1638409_at	FBgn0035147	Gale	0.607118	5.54808	4.6476	0.00134798	0.0570243	-0.968149	0.27525
	1636579_s_at	FBgn0004797	mdy	0.495191	4.74908	4.64168	0.00135899	0.0572827	-0.976601	0.273567
	1630829_at	FBgn0034789	PIP5K59B	-0.313759	3.17152	-4.64107	0.00136013	0.0572827	-0.977478	0.273393
	1626769_s_at	FBgn0033224	Nop17l	0.441016	4.96794	4.63688	0.00136798	0.0574237	-0.983462	0.272205
	1637491_s_at	FBgn0023507	D2hgdh	0.346996	6.36363	4.63593	0.00136977	0.0574237	-0.984819	0.271937
	1623193_at	FBgn0053123	LeuRS	0.323594	2.91384	4.63445	0.00137257	0.0574237	-0.986939	0.271517
	1632963_at	FBgn0039561	mfrn	0.495276	4.97154	4.63006	0.00138089	0.0576014	-0.993218	0.270277
	1639636_at	FBgn0035398	Cht7	-0.530232	1.5567	-4.62901	0.0013829	0.0576014	-0.994729	0.269979
	1628309_at	FBgn0031320	CG5126	0.55477	2.42097	4.62143	0.00139741	0.0580783	-1.00558	0.267846
	1628670_at	FBgn0037870	CG18577	0.357698	1.14959	4.61943	0.00140126	0.0580826	-1.00844	0.267284
	1639870_at	FBgn0083956	CG34120	-0.373734	1.98197	-4.61812	0.00140379	0.0580826	-1.01031	0.266919
	1639016_at	FBgn0030679	CG8206	0.510531	5.76873	4.61662	0.00140671	0.0580826	-1.01247	0.266496
	1623268_a_at	FBgn0061361	CG33786	0.700953	1.55027	4.61338	0.001413	0.0582158	-1.01712	0.26559
	1623268_a_at	FBgn0061362	CG33785	0.700953	1.55027	4.61338	0.001413	0.0582158	-1.01712	0.26559
	1623032_at	FBgn0037455	CG2336	-0.310089	6.01699	-4.60845	0.00142265	0.0584151	-1.02419	0.264212
	1623066_at	FBgn0032706	Irk3	-0.373291	4.47165	-4.60776	0.00142401	0.0584151	-1.02518	0.26402
	1623103_at	FBgn0032405	firl	-0.350584	1.35459	-4.60194	0.00143549	0.0585695	-1.03353	0.262401
	1637401_at	FBgn0030528	CG11095	0.358388	2.194	4.60183	0.0014357	0.0585695	-1.03368	0.262372
	1625082_a_at	FBgn0033047	CG7882	-0.614403	3.595	-4.59971	0.00143992	0.0585695	-1.03673	0.261782
	1638816_at	FBgn0265185	CG44250	0.428603	1.76892	4.5996	0.00144013	0.0585695	-1.03688	0.261752
	1638816_at	FBgn0265186	CG44251	0.428603	1.76892	4.5996	0.00144013	0.0585695	-1.03688	0.261752
	1638816_at	FBgn0265186	CG44251	0.428603	1.76892	4.5996	0.00144013	0.0585695	-1.03688	0.261752
	1636046_at	FBgn0052499	Cda4	-0.450902	0.907801	-4.59724	0.00144484	0.058635	-1.04027	0.261098
	1636071_a_at	FBgn0022942	Cbp80	0.508013	1.87077	4.5927	0.00145393	0.0588779	-1.04679	0.259842
	1623666_at	FBgn0036549	CG10516	-0.605334	4.12646	-4.58855	0.0014623	0.0590906	-1.05275	0.258697
	1639179_at	FBgn0036784	CG5103	-0.308789	5.77312	-4.5821	0.00147541	0.0594937	-1.06203	0.256921
	1632297_at	FBgn0044452	Atg2	0.35703	4.03983	4.57956	0.00148061	0.0595764	-1.06568	0.256225
	1641066_s_at	FBgn0032820	fbp	0.587082	6.55738	4.57707	0.00148572	0.0596555	-1.06927	0.255542
	1628760_at	FBgn0034472	CG8517	-0.326929	8.71533	-4.57388	0.00149229	0.0597927	-1.07385	0.254671
	1622917_a_at	FBgn0259701	CG42355	-0.380485	6.98218	-4.56978	0.00150079	0.0600062	-1.07975	0.253553
	1639478_at	FBgn0032234	gny	0.368023	5.10466	4.56804	0.00150441	0.0600245	-1.08226	0.253079
	1639478_at	FBgn0032235	CG5096	0.368023	5.10466	4.56804	0.00150441	0.0600245	-1.08226	0.253079
	1628547_at	FBgn0038038	Sccpdh2	0.411538	4.10298	4.56508	0.0015106	0.0601446	-1.08652	0.252274
	1626965_at	FBgn0032618	CG31743	0.395225	5.36933	4.55843	0.00152459	0.060554	-1.0961	0.250471
	1626965_at	FBgn0085342	CG34313	0.395225	5.36933	4.55843	0.00152459	0.060554	-1.0961	0.250471
	1624971_at	FBgn0040383	CG5254	0.337691	4.79511	4.55717	0.00152727	0.060554	-1.09793	0.250128
	1637709_at	FBgn0051797	CG31797	-0.324583	2.98031	-4.55341	0.00153526	0.0607438	-1.10335	0.249112
	1624077_at	FBgn0032031	CG13390	0.316437	0.833281	4.54852	0.00154572	0.0609791	-1.11041	0.247795
	1631654_at	FBgn0051693	CG31693	-0.305147	5.23894	-4.54762	0.00154764	0.0609791	-1.1117	0.247554
	1638157_at	FBgn0038552	Alg1	0.342382	3.93344	4.5437	0.0015561	0.0610906	-1.11736	0.246501
	1629096_at	FBgn0260452	CG13984	-0.379	3.82083	-4.54332	0.00155692	0.0610906	-1.11791	0.2464
	1626499_at	FBgn0038391	GATAe	0.47441	1.2638	4.5379	0.0015687	0.0614258	-1.12574	0.244948
	1625342_at	FBgn0053282	CG33282	0.643793	1.83831	4.53301	0.00157941	0.0617173	-1.13281	0.243644
	1627781_at	FBgn0031758	Ucp4B	-0.306784	3.83143	-4.53143	0.00158286	0.0617252	-1.13508	0.243225
	1634529_at	FBgn0283480	Alp2	-0.768738	4.92213	-4.52932	0.00158752	0.0617797	-1.13813	0.242663
	1638717_at	FBgn0029969	CG10932	0.565337	4.85885	4.52412	0.00159905	0.0619954	-1.14565	0.241284
	1639392_at	FBgn0022288	l(2)09851	0.318255	3.1239	4.52388	0.00159961	0.0619954	-1.14601	0.241219
	1635900_at	FBgn0261560	Thor	0.298874	7.90068	4.51808	0.00161256	0.06237	-1.15439	0.239688
	1637002_at	FBgn0036232	CG14125	0.412131	6.38554	4.51353	0.00162283	0.0626394	-1.16099	0.238488
	1623757_at	FBgn0005664	Crys	0.553941	3.39552	4.50601	0.00163993	0.0630492	-1.17188	0.236516
	1626857_at	FBgn0039073	CG4408	0.722041	2.17508	4.50564	0.00164078	0.0630492	-1.17241	0.236419
	1623165_at	FBgn0011555	thetaTry	-0.495066	5.62323	-4.50448	0.00164343	0.0630492	-1.17409	0.236116
	1628398_at	FBgn0032167	CG5853	-0.378925	4.0891	-4.49883	0.00165646	0.0634205	-1.18229	0.23464
	1625477_a_at	FBgn0034909	CG4797	0.86064	3.66208	4.4934	0.00166905	0.0637739	-1.19016	0.233231
	1629572_a_at	FBgn0026721	fat-spondin	0.42428	4.78256	4.4867	0.00168475	0.0642168	-1.19989	0.231496
	1628179_at	FBgn0040684	CG12589	-0.338776	3.04268	-4.48557	0.00168742	0.0642168	-1.20153	0.231203
	1636351_at	FBgn0030239	CG17333	0.366332	5.94923	4.48259	0.00169447	0.0643558	-1.20586	0.230435
	1631604_at	FBgn0259715	CG42369	0.507898	5.89993	4.48026	0.00169999	0.0644088	-1.20924	0.229836
	1637440_at	FBgn0032755	CG17344	-0.312649	8.47977	-4.47868	0.00170376	0.0644088	-1.21154	0.229429
	1637440_at	FBgn0263982	CG43731	-0.312649	8.47977	-4.47868	0.00170376	0.0644088	-1.21154	0.229429
	1627582_a_at	FBgn0050035	Tret1-1	-0.326613	7.75186	-4.47772	0.00170606	0.0644088	-1.21294	0.229181
	1638882_at	FBgn0003308	ry	0.509619	2.93338	4.46971	0.00172528	0.0649781	-1.22457	0.227132
	1635542_at	FBgn0010786	l(3)02640	0.681332	5.4138	4.46723	0.00173128	0.0649781	-1.22818	0.226499
	1634188_a_at	FBgn0014396	tim	0.314603	4.89379	4.46717	0.00173142	0.0649781	-1.22827	0.226484
	1636760_a_at	FBgn0032163	TbCMF46	-0.64204	2.77939	-4.4654	0.00173573	0.0650111	-1.23085	0.226032
	1630359_at	FBgn0051810	CG31810	0.493535	5.17978	4.46393	0.00173931	0.0650167	-1.23299	0.225658
	1626604_at	FBgn0050363	cola	-0.318603	4.15126	-4.45686	0.00175662	0.0655345	-1.24328	0.223866
	1626604_at	FBgn0050366	swif	-0.318603	4.15126	-4.45686	0.00175662	0.0655345	-1.24328	0.223866
	1640216_at	FBgn0028561	sut3	-0.341947	4.57101	-4.45043	0.00177256	0.0659989	-1.25265	0.222241
	1637298_at	FBgn0036760	CG5567	0.30467	5.50747	4.4473	0.00178036	0.0660849	-1.25722	0.221453
	1637919_at	FBgn0033076	CG15233	-0.34874	2.9919	-4.44671	0.00178184	0.0660849	-1.25808	0.221305
	1639971_at	FBgn0037974	CG12224	0.950266	2.81897	4.44391	0.00178884	0.066215	-1.26215	0.220604
	1637054_s_at	FBgn0051719	RluA-1	-0.402169	3.87568	-4.44169	0.00179444	0.0662929	-1.2654	0.220046
	1637213_at	FBgn0051115	CG31115	-0.297683	5.46634	-4.4402	0.0017982	0.0663024	-1.26757	0.219674
	1636971_at	FBgn0033861	CG12464	-0.466459	5.19958	-4.43749	0.00180506	0.066426	-1.27152	0.218997
	1627687_at	FBgn0036905	ms(3)76Ca	-0.317696	6.99284	-4.43472	0.0018121	0.066556	-1.27557	0.218306
	1627687_at	FBgn0036905	ms(3)76Ca	-0.317696	6.99284	-4.43472	0.0018121	0.066556	-1.27557	0.218306
	1627687_at	FBgn0260434	CG42529	-0.317696	6.99284	-4.43472	0.0018121	0.066556	-1.27557	0.218306
	1629497_at	FBgn0031854	TTLL3A	0.287534	0.142518	4.43155	0.00182019	0.0666339	-1.2802	0.217517
	1640836_at	FBgn0037857	Tengl4	-0.30599	5.41764	-4.42505	0.0018369	0.0670419	-1.28968	0.215907
	1641671_at	FBgn0033273	Gasz	-0.347675	2.96975	-4.42405	0.00183948	0.0670419	-1.29114	0.21566
	1641671_at	FBgn0033273	Gasz	-0.347675	2.96975	-4.42405	0.00183948	0.0670419	-1.29114	0.21566
	1639481_at	FBgn0032965	CG11629	-0.38727	2.28368	-4.41827	0.0018545	0.0674597	-1.29959	0.214235
	1635595_at	FBgn0030525	CG10996	-0.31006	4.0237	-4.40851	0.00188019	0.0681714	-1.31387	0.21184
	1627854_at	FBgn0030737	Had1	0.6242	7.99881	4.40686	0.00188455	0.0681714	-1.31628	0.211439
	1636923_a_at	FBgn0033246	ACC	0.353585	7.73675	4.40675	0.00188486	0.0681714	-1.31644	0.21141
	1635628_s_at	FBgn0030724	Nipsnap	0.387746	6.35244	4.40398	0.00189223	0.0683076	-1.3205	0.210736
	1625277_at	FBgn0052463	Tengl2	-0.332552	2.36161	-4.39448	0.00191776	0.0689664	-1.33441	0.208431
	1633765_at	FBgn0270926	AsnS	0.326899	1.78454	4.38305	0.00194896	0.0699559	-1.35117	0.20568
	1639079_at	FBgn0038172	Adgf-D	0.540698	4.63582	4.37686	0.00196608	0.0703452	-1.36025	0.2042
	1633439_at	FBgn0010223	Galphaf	0.56096	1.84015	4.37645	0.00196723	0.0703452	-1.36085	0.204102
	1633439_at	FBgn0010223	Galphaf	0.56096	1.84015	4.37645	0.00196723	0.0703452	-1.36085	0.204102
	1639233_at	FBgn0040234	c12.2	0.338633	2.02671	4.37504	0.00197117	0.0703528	-1.36293	0.203765
	1638388_at	FBgn0039323	CG10559	0.719715	1.87103	4.37353	0.00197537	0.0703528	-1.36514	0.203406
	1626399_at	FBgn0039373	CG5024	-0.314964	7.07125	-4.37117	0.00198196	0.0703528	-1.3686	0.202846
	1627709_at	FBgn0050371	CG30371	0.443107	5.17616	4.37106	0.00198229	0.0703528	-1.36877	0.202819
	1639775_at	FBgn0038944	CG5388	-0.315442	5.3391	-4.36685	0.00199411	0.0706401	-1.37494	0.201822
	1634630_at	FBgn0026593	CG5707	-0.353005	3.79174	-4.35925	0.0020157	0.0711402	-1.38612	0.200028
	1626503_at	FBgn0029994	Ldsdh1	0.435981	7.33416	4.35924	0.00201574	0.0711402	-1.38614	0.200025
	1627226_at	FBgn0262478	CG43068	-0.298196	4.47924	-4.35249	0.0020351	0.0715549	-1.39606	0.198442
	1624145_a_at	FBgn0028372	isopeptidase-T-3	-0.290044	3.4612	-4.35129	0.00203857	0.0715549	-1.39783	0.198161
	1638695_at	FBgn0030731	Mfe2	0.35494	6.18732	4.35005	0.00204216	0.0715549	-1.39965	0.197871
	1631333_s_at	FBgn0000055	Adh	0.27325	10.9895	4.34843	0.00204685	0.0715549	-1.40203	0.197494
	1631333_s_at	FBgn0000056	Adhr	0.27325	10.9895	4.34843	0.00204685	0.0715549	-1.40203	0.197494
	1634130_a_at	FBgn0036030	CG6767	0.563658	7.37183	4.34812	0.00204775	0.0715549	-1.40249	0.197421
	1635110_at	FBgn0033304	Cyp6a13	0.440088	3.82316	4.34646	0.00205257	0.0715549	-1.40493	0.197035
	1632532_s_at	FBgn0010516	wal	0.327862	6.55521	4.346	0.00205392	0.0715549	-1.40561	0.196927
	1630244_s_at	FBgn0051809	CG31809	0.65251	4.29248	4.34266	0.00206368	0.0717629	-1.41053	0.19615
	1630244_s_at	FBgn0051810	CG31810	0.65251	4.29248	4.34266	0.00206368	0.0717629	-1.41053	0.19615
	1640879_at	FBgn0053017	CG33017	-0.332544	3.39238	-4.33335	0.00209111	0.0725839	-1.42424	0.193998
	1627033_at	FBgn0034487	Efhc1.2	-0.295199	1.90423	-4.32925	0.00210334	0.0728748	-1.43029	0.193053
	1628599_at	FBgn0261976	Psf2	-0.406488	3.33195	-4.32088	0.00212851	0.0736122	-1.44263	0.191138
	1641428_at	FBgn0015040	Cyp9c1	0.355002	2.91753	4.3143	0.00214852	0.074169	-1.45235	0.189641
	1623027_s_at	FBgn0039475	CG6277	0.421392	4.63411	4.30594	0.00217427	0.0749213	-1.46471	0.187749
	1623027_s_at	FBgn0039476	CG6271	0.421392	4.63411	4.30594	0.00217427	0.0749213	-1.46471	0.187749
	1624836_at	FBgn0031937	CG13795	0.571426	3.11105	4.30092	0.00218987	0.0752952	-1.47212	0.18662
	1641011_at	FBgn0030078	CG10970	-0.293715	4.16574	-4.2993	0.00219491	0.0752952	-1.47451	0.186258
	1627564_s_at	FBgn0019890	Smg5	0.398149	5.70806	4.2979	0.00219929	0.0752952	-1.47658	0.185945
	1623782_at	FBgn0033052	SCAP	0.37796	4.50317	4.29593	0.00220548	0.0752952	-1.47949	0.185504
	1623887_at	FBgn0033686	Hen1	-0.32449	3.85572	-4.29582	0.00220584	0.0752952	-1.47967	0.185478
	1628929_s_at	FBgn0033434	CG1902	0.310224	6.45007	4.29336	0.00221359	0.0753177	-1.4833	0.184929
	1623733_at	FBgn0023542	Nmd3	0.382131	3.22218	4.29064	0.0022222	0.075475	-1.48733	0.184323
	1625085_at	FBgn0260761	CG42559	-0.358297	6.57073	-4.28883	0.00222794	0.0755349	-1.49001	0.18392
	1625085_at	FBgn0260762	CG42560	-0.358297	6.57073	-4.28883	0.00222794	0.0755349	-1.49001	0.18392
	1626678_at	FBgn0030895	CG7135	0.602909	2.10928	4.28464	0.00224129	0.0758483	-1.49621	0.182992
	1623994_at	FBgn0050412	CG30412	-0.32966	5.0556	-4.28342	0.00224519	0.0758483	-1.49801	0.182722
	1623994_at	FBgn0050416	CG30416	-0.32966	5.0556	-4.28342	0.00224519	0.0758483	-1.49801	0.182722
	1623028_at	FBgn0264775	CG44013	0.438021	3.76442	4.2779	0.00226299	0.0763134	-1.5062	0.181503
	1623028_at	FBgn0264776	CG44014	0.438021	3.76442	4.2779	0.00226299	0.0763134	-1.5062	0.181503
	1630907_at	FBgn0052847	CG32847	-0.313363	6.36835	-4.27623	0.00226836	0.0763588	-1.50866	0.181137
	1632254_a_at	FBgn0061435	CG30270	-0.305847	6.79195	-4.2732	0.0022782	0.0764062	-1.51315	0.180472
	1633454_s_at	FBgn0027621	Pfrx	0.412651	4.15732	4.27313	0.00227843	0.0764062	-1.51326	0.180457
	1640492_at	FBgn0035588	CG10672	0.36031	4.70702	4.27	0.00228868	0.0764062	-1.51791	0.17977
	1638407_at	FBgn0051244	CG31244	-0.291201	5.91318	-4.26983	0.00228921	0.0764062	-1.51815	0.179734
	1637762_s_at	FBgn0064119	CG33934	-0.291451	5.64913	-4.26961	0.00228993	0.0764062	-1.51848	0.179686
	1637762_s_at	FBgn0260466	Indy-2	-0.291451	5.64913	-4.26961	0.00228993	0.0764062	-1.51848	0.179686
	1641741_a_at	FBgn0035734	CG14823	0.430534	3.03438	4.26401	0.00230834	0.0768851	-1.52678	0.178465
	1635645_at	FBgn0032881	Amacr	0.376579	3.51686	4.25663	0.00233285	0.0774634	-1.53774	0.176864
	1623813_at	FBgn0053307	CG33307	0.674211	3.59394	4.25632	0.00233388	0.0774634	-1.53819	0.176798
	1632702_at	FBgn0038089	d-cup	-0.364119	3.86027	-4.25499	0.00233833	0.0774757	-1.54017	0.17651
	1638256_at	FBgn0086448	PIG-Q	0.336302	1.03697	4.25275	0.00234583	0.0775885	-1.54349	0.176028
	1629701_at	FBgn0029809	CG15767	-0.34622	2.97499	-4.25088	0.00235215	0.0776618	-1.54628	0.175624
	1634555_at	FBgn0037659	Kdm2	0.280872	3.23882	4.24588	0.00236905	0.0778037	-1.55371	0.174551
	1630141_at	FBgn0033264	Nup50	0.46853	2.89468	4.24564	0.00236987	0.0778037	-1.55407	0.1745
	1639401_at	FBgn0002570	Mal-A1	0.498234	8.71589	4.24557	0.00237009	0.0778037	-1.55416	0.174486
	1640594_at	FBgn0029823	Shmt	0.794527	6.38111	4.24476	0.00237287	0.0778037	-1.55538	0.174311
	1635753_s_at	FBgn0036082	CG12362	-0.274576	6.74062	-4.24294	0.00237905	0.0778231	-1.55808	0.173923
	1626309_at	FBgn0036203	Muc68D	0.360601	6.47726	4.24217	0.00238167	0.0778231	-1.55922	0.173759
	1630842_s_at	FBgn0052640	CG32640	0.448446	5.6506	4.23635	0.00240163	0.0783401	-1.56787	0.17252
	1630842_s_at	FBgn0052641	CG32641	0.448446	5.6506	4.23635	0.00240163	0.0783401	-1.56787	0.17252
	1624404_a_at	FBgn0030300	Sk1	0.332202	2.91072	4.23257	0.00241471	0.0786066	-1.57351	0.171717
	1631767_at	FBgn0034820	CG13538	-0.305803	5.48108	-4.23159	0.00241809	0.0786066	-1.57496	0.171511
	1631225_at	FBgn0034140	Lst	0.58087	5.93873	4.22482	0.00244171	0.0792386	-1.58504	0.170083
	1632483_at	FBgn0004867	RpS2	0.26985	8.63497	4.22031	0.00245758	0.0796172	-1.59176	0.169137
	1639773_s_at	FBgn0004435	Galphaq	-0.281288	5.73673	-4.21752	0.00246744	0.0798003	-1.59591	0.168554
	1639773_s_at	FBgn0004435	Galphaq	-0.281288	5.73673	-4.21752	0.00246744	0.0798003	-1.59591	0.168554
	1623809_s_at	FBgn0030151	CG1354	0.303546	4.31125	4.21587	0.00247331	0.0798539	-1.59837	0.168209
	1635649_at	FBgn0035831	CG8038	0.417392	1.47941	4.21342	0.00248203	0.0799596	-1.60202	0.1677
	1624425_at	FBgn0032262	CG7384	-0.304518	2.11551	-4.21088	0.00249112	0.0799596	-1.60581	0.167171
	1641286_s_at	FBgn0015245	Hsp60A	0.293808	6.52317	4.21053	0.00249235	0.0799596	-1.60632	0.1671
	1631585_a_at	FBgn0033471	CG12134	-0.32844	0.393749	-4.20957	0.00249582	0.0799596	-1.60777	0.166899
	1625685_at	FBgn0086359	Invadolysin	-0.622421	3.22636	-4.20832	0.00250031	0.0799596	-1.60963	0.16664
	1629303_at	FBgn0052832	CG32832	-0.311488	7.15395	-4.20774	0.00250238	0.0799596	-1.61049	0.166521
	1633180_at	FBgn0000615	exu	-0.299762	8.40481	-4.2067	0.00250612	0.0799596	-1.61203	0.166306
	1637567_at	FBgn0050360	Mal-A6	0.549419	7.34568	4.20442	0.00251438	0.0800882	-1.61544	0.165834
	1632776_at	FBgn0027053	CSN5	0.318263	3.70552	4.20279	0.00252026	0.080141	-1.61787	0.165499
	1627427_s_at	FBgn0050461	CG30461	-0.344234	3.27623	-4.19473	0.00254969	0.0809352	-1.6299	0.163844
	1627427_s_at	FBgn0050462	ste24c	-0.344234	3.27623	-4.19473	0.00254969	0.0809352	-1.6299	0.163844
	1627189_a_at	FBgn0036160	CG12289	-0.372429	5.62737	-4.19362	0.00255378	0.0809352	-1.63156	0.163616
	1640425_at	FBgn0052655	CG32655	-0.304981	7.15999	-4.18399	0.00258945	0.0817827	-1.64594	0.161658
	1624949_at	FBgn0051546	CG31546	-0.296586	6.97672	-4.18303	0.00259304	0.0817827	-1.64738	0.161463
	1623963_at	FBgn0052115	CG32115	0.336301	1.04539	4.18292	0.00259347	0.0817827	-1.64755	0.16144
	1628446_at	FBgn0038790	MtnC	-0.948222	5.81984	-4.17698	0.00261577	0.0821331	-1.65643	0.160242
	1635079_at	FBgn0033225	TTLL12	0.309042	2.61674	4.17688	0.00261617	0.0821331	-1.65659	0.160221
	1629118_at	FBgn0043575	PGRP-SC2	-0.955464	4.21316	-4.1765	0.00261758	0.0821331	-1.65714	0.160146
	1632422_s_at	FBgn0261686	CG42733	-0.350836	5.92666	-4.17446	0.00262531	0.0822145	-1.6602	0.159735
	1635336_at	FBgn0041160	comm2	0.378379	3.66616	4.17353	0.00262885	0.0822145	-1.6616	0.159548
	1639490_at	FBgn0053547	Rim	-0.380433	3.59745	-4.16937	0.00264467	0.0825728	-1.66781	0.158716
	1631301_at	FBgn0050398	CG30398	-0.341936	3.64822	-4.16202	0.00267291	0.0831213	-1.67882	0.157252
	1623695_a_at	FBgn0036337	AdenoK	0.37407	5.56813	4.15952	0.00268258	0.0831213	-1.68256	0.156756
	1623695_a_at	FBgn0036337	AdenoK	0.37407	5.56813	4.15952	0.00268258	0.0831213	-1.68256	0.156756
	1626345_at	FBgn0040653	IM4	0.630353	7.22479	4.15852	0.00268644	0.0831213	-1.68406	0.156559
	1637041_a_at	FBgn0031514	OtopLb	-0.391672	1.96924	-4.15711	0.00269194	0.0831213	-1.68618	0.156279
	1632495_at	FBgn0051867	CG31867	-0.364723	4.95067	-4.15551	0.00269815	0.0831213	-1.68856	0.155965
	1626439_at	FBgn0040718	CG15353	-0.466173	5.39569	-4.1548	0.00270094	0.0831213	-1.68963	0.155824
	1629121_at	FBgn0032805	CG10337	0.497669	1.77525	4.15459	0.00270174	0.0831213	-1.68994	0.155784
	1633379_s_at	FBgn0262975	cnc	0.273185	6.5703	4.15449	0.00270217	0.0831213	-1.6901	0.155762
	1641627_at	FBgn0037714	CG9396	0.366368	5.84507	4.15407	0.00270378	0.0831213	-1.69072	0.155681
	1633652_at	FBgn0038356	CG12784	-0.287425	5.97966	-4.15348	0.00270609	0.0831213	-1.69161	0.155564
	1637341_at	FBgn0028686	Rpt3	0.310936	4.9465	4.14959	0.00272136	0.0833702	-1.69744	0.1548
	1637095_at	FBgn0031910	CG15818	0.493517	3.52878	4.14918	0.00272299	0.0833702	-1.69806	0.154719
	1632740_at	FBgn0259151	CG42266	-0.317293	4.38047	-4.14649	0.00273361	0.0835604	-1.70209	0.154192
	1623447_a_at	FBgn0037970	GC2	-0.286158	6.09979	-4.14489	0.00273995	0.0836192	-1.70449	0.153879
	1623447_a_at	FBgn0037970	GC2	-0.286158	6.09979	-4.14489	0.00273995	0.0836192	-1.70449	0.153879
	1635800_at	FBgn0265052	St3	0.519906	2.29964	4.14327	0.00274639	0.0836809	-1.70692	0.153563
	1635444_at	FBgn0266019	rudhira	0.291135	4.24588	4.13873	0.00276448	0.0840968	-1.71373	0.152681
	1635444_at	FBgn0266019	rudhira	0.291135	4.24588	4.13873	0.00276448	0.0840968	-1.71373	0.152681
	1630132_at	FBgn0027329	CCT6	0.371406	4.43149	4.13398	0.00278358	0.0845422	-1.72086	0.15176
	1639644_at	FBgn0027094	AlaRS	0.353841	3.14921	4.13105	0.00279545	0.0846383	-1.72527	0.151194
	1634636_at	FBgn0034162	CG6426	-0.323244	6.61578	-4.12891	0.00280412	0.0846383	-1.72848	0.150782
	1625276_a_at	FBgn0000565	Eip71CD	0.990157	4.72463	4.12846	0.00280596	0.0846383	-1.72916	0.150695
	1630778_at	FBgn0036367	CG10116	0.371586	3.99569	4.12837	0.0028063	0.0846383	-1.72929	0.150679
	1641535_at	FBgn0032085	CG9555	-0.322441	0.514462	-4.12769	0.00280907	0.0846383	-1.73031	0.150548
	1637399_at	FBgn0042198	CG16741	-0.337659	6.17169	-4.12537	0.00281853	0.0847886	-1.73379	0.150103
	1639944_at	FBgn0038037	Cyp9f2	0.367494	6.44843	4.12328	0.00282711	0.084827	-1.73694	0.149702
	1640344_at	FBgn0028518	CG18480	0.373204	1.76776	4.12288	0.00282876	0.084827	-1.73754	0.149625
	1632645_at	FBgn0033848	CG13330	-0.343598	5.5614	-4.11614	0.00285654	0.0853951	-1.74767	0.148342
	1632398_a_at	FBgn0051735	CG31735	-0.307212	6.54841	-4.1161	0.00285672	0.0853951	-1.74773	0.148334
	1623102_at	FBgn0011770	Gip	0.524145	6.33355	4.11201	0.00287372	0.0857681	-1.75388	0.147559
	1623817_at	FBgn0028534	CG7916	0.778114	6.18561	4.11025	0.00288109	0.0858529	-1.75653	0.147225
	1634208_a_at	FBgn0261261	plx	-0.316394	6.02437	-4.10788	0.002891	0.0860129	-1.76009	0.146779
	1640403_at	FBgn0051871	CG31871	-0.267591	0.379484	-4.10083	0.00292081	0.0865604	-1.77071	0.145454
	1624757_at	FBgn0033969	Pgm2b	-0.299077	6.23604	-4.10066	0.0029215	0.0865604	-1.77096	0.145423
	1636879_at	FBgn0038207	CG14356	-0.389423	1.37675	-4.10029	0.0029231	0.0865604	-1.77153	0.145353
	1641237_a_at	FBgn0260451	CG14042	-0.276901	5.41503	-4.09809	0.00293246	0.0867022	-1.77484	0.144942
	1641237_a_at	FBgn0260470	SP555	-0.276901	5.41503	-4.09809	0.00293246	0.0867022	-1.77484	0.144942
	1625725_at	FBgn0050290	Ppcdc	0.387107	4.82048	4.09565	0.00294286	0.0868436	-1.7785	0.144488
	1625725_at	FBgn0260222	CG42496	0.387107	4.82048	4.09565	0.00294286	0.0868436	-1.7785	0.144488
	1638870_at	FBgn0029940	CG1958	-0.324791	7.15575	-4.09402	0.00294986	0.0868436	-1.78096	0.144184
	1637814_s_at	FBgn0040308	Jafrac2	-0.264816	6.17758	-4.09376	0.002951	0.0868436	-1.78136	0.144135
	1636910_at	FBgn0035583	CG13704	0.346375	3.75727	4.09116	0.00296218	0.0870374	-1.78528	0.143653
	1632809_at	FBgn0033250	CG14762	0.28857	5.00486	4.08964	0.00296873	0.087095	-1.78757	0.143371
	1628485_at	FBgn0034973	CG13564	-0.269409	5.44904	-4.08713	0.00297957	0.0872779	-1.79134	0.142908
	1630637_s_at	FBgn0266599	Hsc70-4	0.274846	8.88626	4.085	0.00298883	0.087414	-1.79455	0.142515
	1624128_at	FBgn0051769	CG31769	0.425754	3.93391	4.08148	0.00300421	0.0876298	-1.79987	0.141867
	1638443_at	FBgn0025612	CG3062	-0.36103	3.88062	-4.08026	0.00300954	0.0876298	-1.80171	0.141643
	1638483_at	FBgn0029963	CG10920	-0.291148	5.24473	-4.08	0.0030107	0.0876298	-1.80211	0.141595
	1622892_s_at	FBgn0035889	mkg-p	-0.301293	5.81951	-4.07909	0.0030147	0.0876298	-1.80348	0.141428
	1622892_s_at	FBgn0053057	CG33057	-0.301293	5.81951	-4.07909	0.0030147	0.0876298	-1.80348	0.141428
	1635185_at	FBgn0036157	CG7560	0.483492	2.12843	4.07694	0.00302416	0.0876807	-1.80673	0.141034
	1624824_at	FBgn0023197	Jon74E	-0.715885	7.78526	-4.07567	0.00302976	0.0876807	-1.80864	0.140803
	1631706_at	FBgn0033412	CG13955	0.286487	0.223039	4.07454	0.00303476	0.0876807	-1.81035	0.140596
	1627467_at	FBgn0031288	CG13949	-0.287283	2.27372	-4.07449	0.00303496	0.0876807	-1.81042	0.140588
	1625212_at	FBgn0030776	CG4653	0.539771	4.87338	4.07016	0.00305417	0.0880859	-1.81695	0.1398
	1636288_at	FBgn0045842	yuri	-0.416525	4.50392	-4.06924	0.00305828	0.0880859	-1.81834	0.139633
	1639091_at	FBgn0028690	Rpn5	0.256467	5.8169	4.0644	0.00307996	0.0885622	-1.82565	0.138757
	1626519_at	FBgn0039744	CG15526	-0.445155	3.0922	-4.06346	0.00308416	0.0885622	-1.82707	0.138588
	1631763_at	FBgn0051793	CG31793	0.336531	3.4675	4.06231	0.00308934	0.0885767	-1.8288	0.138381
	1629077_s_at	FBgn0037443	Dmtn	-0.362222	5.31961	-4.06081	0.00309613	0.0886372	-1.83108	0.13811
	1629077_s_at	FBgn0037443	Dmtn	-0.362222	5.31961	-4.06081	0.00309613	0.0886372	-1.83108	0.13811
	1633168_at	FBgn0030386	CG2574	-0.309244	5.45134	-4.05641	0.00311606	0.0890734	-1.83772	0.137321
	1623707_a_at	FBgn0052192	CG32192	-0.322886	7.86864	-4.05407	0.00312674	0.089244	-1.84126	0.136902
	1623505_s_at	FBgn0029856	CG11700	0.265265	8.90059	4.05221	0.00313524	0.0893113	-1.84407	0.13657
	1623505_s_at	FBgn0086558	Ubi-p5E	0.265265	8.90059	4.05221	0.00313524	0.0893113	-1.84407	0.13657
	1633079_at	FBgn0032868	CG17472	-0.327896	8.03347	-4.05149	0.00313853	0.0893113	-1.84516	0.136443
	1630993_at	FBgn0051414	Gba1b	0.388862	1.83831	4.0471	0.00315872	0.0897513	-1.8518	0.135662
	1641311_at	FBgn0036830	CG14077	-0.28781	5.71727	-4.04313	0.00317714	0.0900003	-1.85781	0.134958
	1634675_s_at	FBgn0029849	Efr	0.545964	5.18589	4.04301	0.00317768	0.0900003	-1.85799	0.134938
	1640650_at	FBgn0024957	Irp-1B	0.348206	5.80772	4.04214	0.00318173	0.0900003	-1.85931	0.134784
	1625114_at	FBgn0032693	Cyp310a1	-0.426072	2.05038	-4.03926	0.00319517	0.0902457	-1.86367	0.134276
	1627259_a_at	FBgn0003028	ovo	-0.344971	2.42567	-4.03661	0.00320759	0.0904616	-1.86769	0.13381
	1640870_s_at	FBgn0027070	CG17322	0.364852	2.55439	4.0347	0.00321652	0.0905099	-1.87057	0.133476
	1625605_at	FBgn0036346	CG11251	-0.305409	5.93414	-4.03421	0.00321885	0.0905099	-1.87131	0.13339
	1635631_a_at	FBgn0027505	Rab3-GAP	-0.296149	8.57546	-4.03189	0.00322982	0.0906838	-1.87484	0.132983
	1627212_at	FBgn0003231	ref(2)P	0.372609	7.14443	4.02957	0.0032408	0.0908574	-1.87835	0.132579
	1638494_at	FBgn0034840	CG3124	-0.303317	8.29937	-4.0237	0.00326875	0.0915056	-1.88723	0.13156
	1633966_at	FBgn0050363	cola	-0.288191	6.73139	-4.01846	0.00329397	0.0920758	-1.89519	0.130654
	1633966_at	FBgn0050366	swif	-0.288191	6.73139	-4.01846	0.00329397	0.0920758	-1.89519	0.130654
	1640113_at	FBgn0036931	CG14183	-0.263334	6.08338	-4.01467	0.00331232	0.0923858	-1.90094	0.130003
	1636932_at	FBgn0031428	CG9886	0.381751	4.61237	4.01415	0.00331481	0.0923858	-1.90172	0.129914
	1624487_at	FBgn0034687	CG11475	-0.324946	4.28605	-4.01245	0.00332311	0.092481	-1.9043	0.129622
	1631743_at	FBgn0058172	lncRNA:CR40172	-0.253565	0.479415	-4.00998	0.00333515	0.09268	-1.90805	0.129201
	1631743_at	FBgn0058172	lncRNA:CR40172	-0.253565	0.479415	-4.00998	0.00333515	0.09268	-1.90805	0.129201
	1640923_at	FBgn0034076	Jhedup	0.546204	2.15639	4.00773	0.00334621	0.0928512	-1.91147	0.128816
	1628339_a_at	FBgn0039737	CG7920	0.345731	6.64995	4.00449	0.00336213	0.0931565	-1.91638	0.128266
	1637752_a_at	FBgn0037697	GstZ2	0.360282	3.05029	4.00058	0.00338148	0.0933305	-1.92232	0.127603
	1625828_at	FBgn0039628	CG11841	0.374805	4.53124	3.99987	0.00338502	0.0933305	-1.9234	0.127483
	1630861_at	FBgn0034057	CG8314	0.359472	3.20484	3.99928	0.00338793	0.0933305	-1.92429	0.127384
	1629784_a_at	FBgn0040299	Myo28B1	0.37597	1.11658	3.99742	0.0033972	0.0933305	-1.92712	0.12707
	1631058_s_at	FBgn0025814	Mgstl	0.37117	7.56327	3.99737	0.00339749	0.0933305	-1.92721	0.12706
	1636674_at	FBgn0038733	CG11407	0.425003	4.73982	3.99427	0.00341299	0.0933305	-1.93191	0.126539
	1625243_a_at	FBgn0000541	E(bx)	-0.281767	4.18878	-3.99342	0.00341723	0.0933305	-1.9332	0.126397
	1626782_at	FBgn0032596	Prosbeta4	0.289408	5.89313	3.99342	0.00341725	0.0933305	-1.9332	0.126396
	1626782_at	FBgn0032596	Prosbeta4	0.289408	5.89313	3.99342	0.00341725	0.0933305	-1.9332	0.126396
	1632627_at	FBgn0051897	CG31897	-0.304655	0.67477	-3.99293	0.00341968	0.0933305	-1.93394	0.126315
	1629848_s_at	FBgn0037884	Arfip	-0.310214	3.54612	-3.99244	0.00342216	0.0933305	-1.93469	0.126232
	1629848_s_at	FBgn0037884	Arfip	-0.310214	3.54612	-3.99244	0.00342216	0.0933305	-1.93469	0.126232
	1641485_at	FBgn0004066	Prosalpha4	0.284482	5.01896	3.99236	0.00342258	0.0933305	-1.93482	0.126218
	1641485_at	FBgn0004066	Prosalpha4	0.284482	5.01896	3.99236	0.00342258	0.0933305	-1.93482	0.126218
	1636967_a_at	FBgn0038984	AdipoR	0.337226	7.23451	3.98151	0.00347757	0.0946776	-1.95131	0.124411
	1636967_a_at	FBgn0038984	AdipoR	0.337226	7.23451	3.98151	0.00347757	0.0946776	-1.95131	0.124411
	1641204_at	FBgn0038311	CG14864	-0.326744	3.6984	-3.97979	0.0034864	0.0946776	-1.95393	0.124126
	1639749_a_at	FBgn0003892	ptc	0.355808	0.192201	3.97964	0.00348717	0.0946776	-1.95416	0.124101
	1627733_at	FBgn0038558	CG12347	-0.317011	4.25861	-3.97736	0.00349887	0.0946776	-1.95762	0.123725
	1635115_at	FBgn0050325	CG30325	-0.337687	3.09731	-3.97662	0.0035027	0.0946776	-1.95875	0.123602
	1626533_a_at	FBgn0262740	Evi5	-0.318926	2.13919	-3.97649	0.00350337	0.0946776	-1.95895	0.123581
	1631829_at	FBgn0030440	CG15719	-0.33865	4.82732	-3.97579	0.00350695	0.0946776	-1.96001	0.123466
	1635874_at	FBgn0031265	CG2794	-0.279089	3.98854	-3.97322	0.00352025	0.0949015	-1.96392	0.123043
	1635548_s_at	FBgn0050287	CG30287	0.560878	7.52772	3.97137	0.00352984	0.095025	-1.96674	0.12274
	1635548_s_at	FBgn0085195	CG34166	0.560878	7.52772	3.97137	0.00352984	0.095025	-1.96674	0.12274
	1630482_at	FBgn0028892	CG4161	-0.285823	5.61396	-3.9702	0.00353594	0.095054	-1.96852	0.122548
	1628076_at	FBgn0023495	Lip3	0.36253	0.300728	3.96783	0.00354829	0.095251	-1.97213	0.122161
	1640126_at	FBgn0034045	CG8249	0.573882	2.99386	3.96626	0.0035565	0.0952717	-1.97452	0.121905
	1637790_a_at	FBgn0261287	ymp	-0.28549	7.98107	-3.96576	0.00355912	0.0952717	-1.97528	0.121823
	1636404_at	FBgn0013301	ProtB	-0.378284	6.69371	-3.96307	0.00357328	0.0955159	-1.97939	0.121384
	1628260_at	FBgn0033680	CG13186	-0.319798	6.42071	-3.96195	0.00357917	0.0955387	-1.98109	0.121203
	1630584_at	FBgn0036289	CG10657	-0.550607	4.08809	-3.95885	0.00359558	0.0956679	-1.98582	0.1207
	1636442_at	FBgn0029947	CG1999	-0.314193	6.4413	-3.95843	0.00359781	0.0956679	-1.98646	0.120632
	1635923_at	FBgn0037462	sunz	-0.293622	5.23596	-3.95817	0.00359916	0.0956679	-1.98685	0.120591
	1634477_at	FBgn0259237	CG42335	0.344488	0.215912	3.9572	0.00360434	0.0956715	-1.98834	0.120433
	1634390_s_at	FBgn0086904	Nacalpha	0.263112	7.89492	3.95522	0.00361484	0.0958013	-1.99134	0.120115
	1637792_at	FBgn0028550	Atf3	-0.282448	3.72335	-3.95438	0.00361934	0.0958013	-1.99263	0.119979
	1622956_at	FBgn0051542	CG31542	-0.314655	7.03145	-3.9531	0.00362617	0.0958483	-1.99458	0.119773
	1622956_at	FBgn0085306	CG34277	-0.314655	7.03145	-3.9531	0.00362617	0.0958483	-1.99458	0.119773
	1639599_at	FBgn0031318	CG4887	-0.269944	2.5446	-3.94975	0.00364411	0.0961461	-1.99968	0.119236
	1624622_at	FBgn0040506	ACXE	-0.489653	0.906392	-3.94911	0.00364759	0.0961461	-2.00067	0.119133
	1625743_at	FBgn0002937	ninaB	0.604071	2.28948	3.94718	0.00365798	0.0962862	-2.00361	0.118824
	1637256_at	FBgn0266719	stac	-0.320059	3.86343	-3.94533	0.00366797	0.0964153	-2.00643	0.118529
	1637256_at	FBgn0266719	stac	-0.320059	3.86343	-3.94533	0.00366797	0.0964153	-2.00643	0.118529
	1636988_at	FBgn0038127	CG8476	-0.303395	6.23	-3.9436	0.00367733	0.0965274	-2.00906	0.118254
	1626523_a_at	FBgn0005674	GluProRS	0.281499	4.39332	3.94119	0.00369049	0.0966228	-2.01276	0.11787
	1631632_s_at	FBgn0000182	BicC	-0.394247	4.93636	-3.94077	0.00369273	0.0966228	-2.01339	0.117805
	1640552_at	FBgn0046114	Gclm	0.305565	1.85224	3.9382	0.00370682	0.0966228	-2.01732	0.117396
	1638750_at	FBgn0031331	CG5440	0.280218	2.56844	3.93491	0.00372485	0.0966228	-2.02234	0.116877
	1632577_a_at	FBgn0263740	eIF2gamma	0.277356	5.41127	3.93484	0.00372523	0.0966228	-2.02244	0.116866
	1634490_at	FBgn0051835	CG31835	-0.277471	4.81399	-3.93472	0.00372591	0.0966228	-2.02263	0.116847
	1634490_at	FBgn0260953	CG42585	-0.277471	4.81399	-3.93472	0.00372591	0.0966228	-2.02263	0.116847
	1631324_at	FBgn0037985	ssp5	-0.31947	7.75141	-3.93274	0.00373683	0.0966228	-2.02566	0.116535
	1630368_at	FBgn0033056	CG7856	-0.382067	4.77935	-3.93238	0.00373879	0.0966228	-2.0262	0.11648
	1623896_a_at	FBgn0085433	CG34404	-0.262589	2.28986	-3.93208	0.00374046	0.0966228	-2.02666	0.116432
	1627928_at	FBgn0036723	CG12229	-0.324963	6.57055	-3.93109	0.00374595	0.0966228	-2.02818	0.116276
	1627928_at	FBgn0036905	ms(3)76Ca	-0.324963	6.57055	-3.93109	0.00374595	0.0966228	-2.02818	0.116276
	1640754_at	FBgn0036449	bmm	0.468231	6.27427	3.93031	0.00375023	0.0966228	-2.02936	0.116155
	1628051_at	FBgn0050376	CG30376	-0.295826	7.51104	-3.92952	0.00375466	0.0966228	-2.03058	0.11603
	1625991_s_at	FBgn0035422	RpL28	0.246211	8.35628	3.92871	0.00375912	0.0966228	-2.03181	0.115904
	1641213_s_at	FBgn0037686	RpL34b	0.250986	8.15277	3.92855	0.00376004	0.0966228	-2.03206	0.115878
	1627741_at	FBgn0032770	CG13086	0.436024	3.3387	3.92802	0.00376296	0.0966228	-2.03286	0.115796
	1636962_at	FBgn0032003	CG8349	-0.308081	6.27276	-3.92781	0.00376415	0.0966228	-2.03319	0.115762
	1637389_at	FBgn0039879	Ir100a	-0.2814	0.349728	-3.92718	0.00376764	0.0966228	-2.03414	0.115664
	1639097_at	FBgn0000927	fs(1)Ya	-0.258484	0.338065	-3.92389	0.003786	0.0969236	-2.03917	0.115151
	1630403_s_at	FBgn0037341	CG12746	0.335365	4.10775	3.92325	0.0037896	0.0969236	-2.04015	0.115051
	1624192_at	FBgn0031142	r-cup	-0.2662	3.93503	-3.91687	0.00382554	0.0976415	-2.04991	0.114062
	1630652_at	FBgn0262564	lncRNA:CR43104	-0.355356	2.31558	-3.91644	0.00382797	0.0976415	-2.05056	0.113995
	1631513_at	FBgn0050000	GstT1	0.249998	4.72134	3.91461	0.00383833	0.0977742	-2.05336	0.113714
	1639827_at	FBgn0038697	CG3581	-0.296817	7.23595	-3.90771	0.00387776	0.0981562	-2.06392	0.112653
	1627190_at	FBgn0033588	CG13228	-0.254306	0.034596	-3.9058	0.00388878	0.0981562	-2.06685	0.112361
	1626074_at	FBgn0262035	CG42846	0.332933	4.54722	3.90527	0.00389181	0.0981562	-2.06766	0.11228
	1637276_at	FBgn0267727	Pen	-0.285692	8.41454	-3.9043	0.00389739	0.0981562	-2.06914	0.112133
	1625620_a_at	FBgn0264270	Sxl	-0.412724	2.44451	-3.90364	0.00390119	0.0981562	-2.07014	0.112033
	1633361_at	FBgn0038709	CG15025	-0.344431	5.11277	-3.90274	0.00390642	0.0981562	-2.07153	0.111895
	1630456_at	FBgn0005536	Mbs	-0.316191	4.88066	-3.90218	0.00390968	0.0981562	-2.07239	0.111809
	1630251_at	FBgn0038213	CG9624	-0.309012	6.45139	-3.90209	0.00391018	0.0981562	-2.07252	0.111796
	1630088_at	FBgn0032322	CG16743	0.528703	4.45644	3.9012	0.00391532	0.0981562	-2.07388	0.111661
	1627912_at	FBgn0034364	CG5493	0.523746	3.71057	3.90085	0.00391735	0.0981562	-2.07442	0.111608
	1641711_at	FBgn0025620	CG13360	-0.338582	4.96398	-3.90078	0.0039178	0.0981562	-2.07454	0.111597
	1624280_at	FBgn0030007	alpha-PheRS	0.243246	2.7867	3.90016	0.0039214	0.0981562	-2.07548	0.111502
	1641702_at	FBgn0032369	CG6614	-0.308165	3.22301	-3.89992	0.00392278	0.0981562	-2.07585	0.111466
	1636686_at	FBgn0264560	garz	-0.272126	3.68578	-3.8994	0.00392583	0.0981562	-2.07665	0.111387
	1632509_at	FBgn0039071	bb8	-0.288024	7.73969	-3.89723	0.00393846	0.0982054	-2.07997	0.111059
	1628231_at	FBgn0004852	Ac76E	-0.280322	3.87139	-3.8968	0.00394095	0.0982054	-2.08062	0.110995
	1632936_at	FBgn0026616	alpha-Man-IIb	-0.258381	3.52269	-3.89639	0.00394335	0.0982054	-2.08125	0.110933
	1631991_at	FBgn0034144	CG5089	-0.262158	9.08289	-3.89379	0.00395862	0.0984563	-2.08524	0.110539
	1626593_at	FBgn0037837	CG14693	-0.349941	1.73608	-3.89088	0.00397571	0.0987518	-2.0897	0.110102
	1627015_at	FBgn0030026	sni	0.326479	3.39195	3.88863	0.00398902	0.0988139	-2.09315	0.109765
	1635294_at	FBgn0038179	CG9312	0.441012	3.4925	3.88835	0.00399067	0.0988139	-2.09358	0.109723
	1632582_at	FBgn0032908	CG9270	0.436236	1.41477	3.88781	0.00399385	0.0988139	-2.0944	0.109642
	1639782_at	FBgn0036236	CG6931	-0.29907	3.62056	-3.8868	0.00399985	0.0988333	-2.09595	0.109491
	1629939_a_at	FBgn0035298	SCOT	0.415757	4.58809	3.88431	0.00401467	0.0990705	-2.09977	0.109119
	1629939_a_at	FBgn0035298	SCOT	0.415757	4.58809	3.88431	0.00401467	0.0990705	-2.09977	0.109119
	1634514_at	FBgn0053258	CG33258	0.452164	5.87504	3.88269	0.00402434	0.0991653	-2.10226	0.108878
	1628811_at	FBgn0039395	CG14546	-0.250832	5.22849	-3.88191	0.00402898	0.0991653	-2.10345	0.108762
	1626602_at	FBgn0020618	Rack1	0.26181	8.33331	3.88068	0.00403637	0.0992182	-2.10534	0.108579
	1637034_at	FBgn0052371	CG32371	-0.328973	7.50355	-3.87727	0.00405684	0.0994791	-2.11057	0.108074
	1628383_at	FBgn0039511	CG3330	-0.280749	8.26325	-3.87717	0.00405748	0.0994791	-2.11073	0.108059
	1625915_at	FBgn0031295	CG4375	-0.293341	8.34014	-3.87367	0.00407858	0.0998674	-2.11609	0.107543
	1636756_at	FBgn0051627	CG31627	-0.27495	5.28335	-3.87221	0.00408747	0.0998689	-2.11833	0.107328
	1635524_at	FBgn0043792	CG30427	-0.393688	3.30882	-3.87193	0.00408919	0.0998689	-2.11877	0.107286
	1637788_at	FBgn0051176	CG31176	-0.295036	1.30317	-3.86583	0.00412638	0.100495	-2.12812	0.106394
	1640454_at	FBgn0027493	AdSS	0.301152	6.6092	3.86535	0.00412935	0.100495	-2.12886	0.106323
	1640454_at	FBgn0027493	AdSS	0.301152	6.6092	3.86535	0.00412935	0.100495	-2.12886	0.106323
	1632607_at	FBgn0053189	CG33189	-0.294984	6.5767	-3.86504	0.00413126	0.100495	-2.12934	0.106278
	1623465_at	FBgn0032268	CG6138	-0.415037	5.73212	-3.86426	0.00413603	0.100495	-2.13053	0.106165
	1625527_at	FBgn0038486	CG5265	-0.314227	5.71568	-3.86321	0.00414249	0.100523	-2.13214	0.106012
	1637487_at	FBgn0013770	Cp1	0.420786	0.625666	3.86159	0.00415251	0.100629	-2.13464	0.105775
	1628512_at	FBgn0036763	TrpRS-m	-0.30185	7.0679	-3.86079	0.00415747	0.100629	-2.13587	0.105659
	1625186_at	FBgn0038361	Uros2	-0.306241	6.27953	-3.85353	0.00420259	0.101471	-2.14702	0.10461
	1625785_at	FBgn0027279	l(1)G0196	-0.381794	2.78014	-3.85331	0.004204	0.101471	-2.14736	0.104578
	1640067_at	FBgn0261287	ymp	-0.26079	5.73256	-3.85261	0.00420834	0.101471	-2.14843	0.104478
	1631320_at	FBgn0022768	Pp2C1	-0.26695	4.15297	-3.84878	0.00423242	0.101922	-2.15432	0.103928
	1632103_at	FBgn0037270	eIF3f1	0.296108	4.67614	3.84352	0.00426573	0.102594	-2.16242	0.103177
	1629838_at	FBgn0034129	Parp16	-0.316654	4.91333	-3.84243	0.00427264	0.10263	-2.16409	0.103022
	1639327_at	FBgn0038386	CG5478	-0.322836	3.91027	-3.84068	0.00428383	0.102769	-2.16679	0.102773
	1627634_at	FBgn0034398	CG15098	0.261394	7.65598	3.83809	0.0043004	0.102846	-2.17077	0.102406
	1624335_at	FBgn0031851	Aatf	0.322088	1.01443	3.83783	0.00430203	0.102846	-2.17117	0.10237
	1624335_at	FBgn0031851	Aatf	0.322088	1.01443	3.83783	0.00430203	0.102846	-2.17117	0.10237
	1640020_at	FBgn0030520	Pdcd4	0.310634	5.15936	3.83703	0.00430717	0.102846	-2.1724	0.102257
	1640743_at	FBgn0000455	Dip-C	0.319282	4.4584	3.83635	0.00431155	0.102846	-2.17345	0.10216
	1640760_at	FBgn0038826	Syp	-0.26059	8.09366	-3.83543	0.00431748	0.102846	-2.17487	0.10203
	1640128_at	FBgn0052983	CG32983	-0.428819	2.62755	-3.8351	0.0043196	0.102846	-2.17537	0.101984
	1641659_s_at	FBgn0039697	CG7834	0.288925	7.57242	3.83188	0.00434037	0.103155	-2.18032	0.101531
	1624591_at	FBgn0031784	CG9222	-0.292967	6.60584	-3.8314	0.00434348	0.103155	-2.18106	0.101464
	1630520_s_at	FBgn0062961	lncRNA:CR33942	0.501301	3.97176	3.82979	0.00435397	0.103165	-2.18355	0.101237
	1638550_s_at	FBgn0003074	Pgi	0.283899	8.09869	3.82852	0.00436217	0.103165	-2.1855	0.101061
	1627047_at	FBgn0038292	CG3987	0.444948	3.91855	3.82799	0.00436567	0.103165	-2.18632	0.100985
	1639436_at	FBgn0005779	PpD6	-0.302251	3.45986	-3.82689	0.0043728	0.103205	-2.18801	0.100833
	1626094_at	FBgn0033214	CG1941	0.689217	3.80436	3.82314	0.00439733	0.103393	-2.19378	0.10031
	1636490_at	FBgn0043578	PGRP-SB1	0.821276	4.24429	3.82305	0.00439792	0.103393	-2.19392	0.100298
	1641472_at	FBgn0036708	CG13725	-0.302273	6.54995	-3.82183	0.00440598	0.103393	-2.19581	0.100127
	1633039_at	FBgn0039525	CG5646	0.345351	3.45267	3.8212	0.00441015	0.103393	-2.19679	0.100039
	1639262_at	FBgn0033296	Mal-A7	0.715033	6.0772	3.82114	0.0044105	0.103393	-2.19687	0.100032
	1636000_at	FBgn0039237	CG13640	-0.272543	0.0174782	-3.82006	0.00441761	0.103393	-2.19853	0.0998825
	1635632_at	FBgn0036808	Dic4	-0.284982	3.31401	-3.81986	0.00441897	0.103393	-2.19885	0.099854
	1627807_at	FBgn0032269	w-cup	-0.268244	7.88313	-3.81665	0.00444016	0.103656	-2.20379	0.0994109
	1631206_a_at	FBgn0029877	CG17717	-0.261181	5.12223	-3.81651	0.00444113	0.103656	-2.20401	0.0993908
	1637080_at	FBgn0035196	CG9129	-0.25091	7.42657	-3.81379	0.00445917	0.103944	-2.20819	0.099017
	1639158_at	FBgn0036442	CG13473	-0.340362	5.88062	-3.813	0.00446447	0.103944	-2.20942	0.0989076
	1641263_at	FBgn0051816	CG31816	-0.33559	7.01557	-3.80994	0.00448493	0.104213	-2.21414	0.0984879
	1634190_a_at	FBgn0032268	CG6138	-0.316371	6.16061	-3.80945	0.00448817	0.104213	-2.21489	0.0984217
	1628625_at	FBgn0033437	CG12926	0.254572	3.54093	3.80881	0.00449251	0.104213	-2.21588	0.0983332
	1629546_at	FBgn0038972	CG7054	0.330308	5.55519	3.80618	0.00451017	0.104295	-2.21993	0.0979748
	1627714_at	FBgn0032110	CG3748	-0.286923	5.37192	-3.80574	0.00451316	0.104295	-2.22061	0.0979146
	1636975_at	FBgn0046793	CG32236	-0.248336	5.92706	-3.80573	0.00451322	0.104295	-2.22063	0.0979133
	1638107_at	FBgn0039190	CG5762	-0.307261	8.11128	-3.80501	0.00451807	0.104295	-2.22174	0.0978154
	1641479_at	FBgn0033798	CG15870	0.297298	1.48665	3.80367	0.00452713	0.10435	-2.2238	0.0976333
	1632316_at	FBgn0033883	CG16935	0.279643	5.74379	3.80304	0.00453143	0.10435	-2.22478	0.0975469
	1637600_at	FBgn0032360	CG14926	-0.272525	9.34044	-3.80154	0.00454162	0.104457	-2.2271	0.097343
	1637848_at	FBgn0030951	CG6873	-0.306341	5.17168	-3.80057	0.00454821	0.104482	-2.2286	0.0972118
	1629289_at	FBgn0051921	CG31921	-0.279752	5.97353	-3.79842	0.00456286	0.104527	-2.23192	0.0969208
	1637701_at	FBgn0050042	Cpr49Ab	-0.356239	4.43196	-3.79684	0.00457365	0.104527	-2.23435	0.0967078
	1632712_s_at	FBgn0261113	Xrp1	0.272365	7.33337	3.79547	0.00458306	0.104527	-2.23647	0.0965228
	1640399_at	FBgn0030425	Nep6	0.449677	4.30427	3.79538	0.00458364	0.104527	-2.2366	0.0965113
	1625065_s_at	FBgn0029761	SK	-0.344507	3.59889	-3.79533	0.004584	0.104527	-2.23668	0.0965043
	1628229_at	FBgn0028990	Spn27A	0.2972	3.75109	3.79487	0.00458717	0.104527	-2.2374	0.0964422
	1626854_at	FBgn0047338	CG32148	-0.293957	6.68614	-3.79463	0.00458877	0.104527	-2.23776	0.0964107
	1635525_at	FBgn0030777	CG9672	0.66676	5.23755	3.79275	0.00460175	0.104697	-2.24067	0.0961572
	1624860_at	FBgn0051804	CG31804	-0.251274	6.17064	-3.79117	0.00461262	0.1048	-2.24311	0.0959458
	1630227_a_at	FBgn0037702	CG8176	-0.279688	4.55649	-3.78995	0.00462105	0.1048	-2.24499	0.0957825
	1630227_a_at	FBgn0037703	JHDM2	-0.279688	4.55649	-3.78995	0.00462105	0.1048	-2.24499	0.0957825
	1637660_at	FBgn0035620	Alp9	-1.00894	2.95994	-3.78968	0.00462289	0.1048	-2.2454	0.095747
	1641368_at	FBgn0086779	step	-0.257921	4.26445	-3.7877	0.00463667	0.104903	-2.24847	0.0954815
	1626880_at	FBgn0039691	IntS11	0.256661	2.08594	3.78743	0.00463848	0.104903	-2.24887	0.0954467
	1633701_at	FBgn0035355	CG16985	0.326725	5.33855	3.78342	0.00466645	0.105335	-2.25507	0.0949127
	1631102_a_at	FBgn0000028	acj6	-0.334263	1.45375	-3.78288	0.00467022	0.105335	-2.25591	0.094841
	1639147_s_at	FBgn0050438	CG30438	-0.310838	6.25903	-3.78231	0.00467425	0.105335	-2.2568	0.0947647
	1639789_at	FBgn0030359	CG18130	-0.276945	4.30965	-3.78042	0.00468745	0.105507	-2.25971	0.0945155
	1624090_at	FBgn0085353	CG34324	0.243255	8.38271	3.77892	0.00469804	0.105527	-2.26203	0.0943164
	1629644_s_at	FBgn0039532	Mtl	-0.330404	4.78838	-3.77792	0.00470507	0.105527	-2.26358	0.0941848
	1624509_at	FBgn0002571	Mal-A3	0.940296	4.70485	3.77657	0.00471458	0.105573	-2.26566	0.0940073
	1640977_at	FBgn0032393	Nfs1	0.291946	4.70863	3.77526	0.00472384	0.105573	-2.26768	0.0938351
	1639298_at	FBgn0031545	CG3213	-0.294001	8.82362	-3.77144	0.004751	0.106055	-2.2736	0.0933335
	1624287_at	FBgn0032419	CG17217	-0.276733	4.95591	-3.76917	0.00476718	0.106216	-2.2771	0.0930372
	1635963_a_at	FBgn0030997	CG7990	-0.323791	2.77009	-3.76679	0.0047843	0.106405	-2.2808	0.0927258
	1639364_at	FBgn0001285	Jon44E	-1.17223	3.03646	-3.76611	0.00478914	0.106405	-2.28184	0.0926381
	1637587_at	FBgn0034459	TTLL6A	-0.323602	5.67224	-3.76415	0.00480324	0.106594	-2.28487	0.0923836
	1626845_at	FBgn0037632	CCT7	0.288367	4.3703	3.76071	0.00482812	0.106912	-2.2902	0.0919379
	1630320_at	FBgn0010357	betaTry	-0.516225	9.33072	-3.7606	0.00482888	0.106912	-2.29036	0.0919242
	1633837_at	FBgn0050072	Obp50c	-0.298029	4.14886	-3.75959	0.00483624	0.10695	-2.29193	0.0917933
	1633837_at	FBgn0050073	Obp50b	-0.298029	4.14886	-3.75959	0.00483624	0.10695	-2.29193	0.0917933
	1626545_at	FBgn0264908	pHCl-1	-0.274166	2.69251	-3.75748	0.00485158	0.107164	-2.2952	0.0915215
	1631003_at	FBgn0259176	bun	0.29552	0.997261	3.75347	0.00488088	0.107607	-2.30141	0.0910064
	1625511_at	FBgn0085412	CG34383	-0.306358	2.65481	-3.75283	0.00488561	0.107607	-2.3024	0.090924
	1637198_at	FBgn0027562	CG10345	-0.318466	4.75987	-3.75241	0.00488864	0.107607	-2.30305	0.090871
	1630805_at	FBgn0014366	noi	0.276421	3.42936	3.75051	0.00490265	0.10779	-2.306	0.0906276
	1624457_at	FBgn0036217	CG5906	-0.290758	5.98154	-3.74719	0.00492716	0.108203	-2.31114	0.0902049
	1641721_a_at	FBgn0039406	RpL34a	0.261002	6.31004	3.74421	0.00494932	0.108486	-2.31576	0.089826
	1631082_at	FBgn0004587	B52	-0.417509	0.709432	-3.74391	0.00495149	0.108486	-2.31621	0.0897889
	1628015_at	FBgn0263257	Cngl	-0.340138	0.902607	-3.74161	0.00496869	0.108727	-2.31979	0.0894973
	1623544_at	FBgn0259236	comm3	0.474578	1.57077	3.7409	0.00497394	0.108727	-2.32088	0.0894085
	1630701_at	FBgn0029980	CG10778	0.363002	2.36147	3.7374	0.00500023	0.109155	-2.32631	0.0889671
	1640131_a_at	FBgn0037897	CG5270	-0.351403	2.55527	-3.73676	0.00500507	0.109155	-2.32731	0.0888864
	1638940_at	FBgn0030808	RhoGAP15B	-0.245988	2.47747	-3.73384	0.0050271	0.10951	-2.33184	0.0885205
	1634898_a_at	FBgn0027950	MBD-like	-0.280349	3.39853	-3.73289	0.00503428	0.109511	-2.33331	0.0884019
	1628448_at	FBgn0051473	CG31473	-0.310659	6.54936	-3.73217	0.00503971	0.109511	-2.33442	0.0883123
	1629786_a_at	FBgn0051116	ClC-a	-0.288781	4.20891	-3.73154	0.00504449	0.109511	-2.3354	0.0882336
	1638521_a_at	FBgn0037375	kat-60L1	-0.266929	6.09258	-3.73018	0.00505485	0.10961	-2.33751	0.0880637
	1624553_a_at	FBgn0260461	Rcd7	-0.27378	7.3486	-3.72836	0.00506869	0.109662	-2.34033	0.0878377
	1629163_at	FBgn0029751	CG17764	-0.39964	4.30793	-3.72835	0.00506881	0.109662	-2.34035	0.0878358
	1635807_at	FBgn0033710	CG17739	0.299544	4.17136	3.72573	0.00508882	0.10997	-2.34441	0.0875109
	1628627_at	FBgn0033996	CG11807	-0.315515	3.64644	-3.72405	0.00510171	0.110123	-2.34702	0.087303
	1626442_at	FBgn0031971	Sirup	0.294086	5.53548	3.7206	0.00512831	0.110381	-2.35238	0.0868769
	1626442_at	FBgn0031971	Sirup	0.294086	5.53548	3.7206	0.00512831	0.110381	-2.35238	0.0868769
	1638607_s_at	FBgn0029176	eEF1gamma	0.245337	8.26577	3.71993	0.00513345	0.110381	-2.35341	0.086795
	1633823_at	FBgn0032448	CG5781	-0.293169	5.3513	-3.71951	0.00513672	0.110381	-2.35407	0.0867432
	1634692_at	FBgn0040763	CG18336	-0.317337	7.84111	-3.71948	0.00513699	0.110381	-2.35412	0.0867388
	1626124_at	FBgn0039789	CG9717	-0.355939	2.55484	-3.71829	0.00514619	0.110454	-2.35596	0.0865929
	1639286_s_at	FBgn0031449	CG31689	0.278836	5.78397	3.71635	0.00516121	0.110651	-2.35897	0.0863556
	1638037_a_at	FBgn0051361	dpr17	-0.32042	6.18195	-3.7151	0.00517097	0.110735	-2.36091	0.0862022
	1616608_a_at	FBgn0001128	Gpdh1	-0.254623	8.67708	-3.71384	0.00518078	0.110767	-2.36287	0.0860485
	1639610_at	FBgn0037675	HP1e	-0.28695	2.76597	-3.71341	0.00518416	0.110767	-2.36354	0.0859956
	1627939_a_at	FBgn0266268	FeCH	0.257251	4.47348	3.71245	0.00519166	0.110802	-2.36503	0.0858786
	1635701_at	FBgn0010039	GstD3	0.42708	5.61139	3.71129	0.00520075	0.110871	-2.36683	0.0857372
	1625948_at	FBgn0032144	CG17633	-0.792247	5.89475	-3.71004	0.00521054	0.110955	-2.36877	0.0855854
	1637983_s_at	FBgn0039109	CG10365	-0.252713	6.79516	-3.70832	0.00522414	0.111053	-2.37145	0.0853755
	1630896_at	FBgn0039792	CG2267	-0.330304	7.26607	-3.70768	0.00522912	0.111053	-2.37244	0.085299
	1626307_at	FBgn0030725	CG8958	-0.300755	3.30228	-3.70723	0.0052327	0.111053	-2.37314	0.0852439
	1637866_at	FBgn0032925	CG9246	0.264688	1.02814	3.70609	0.00524171	0.111058	-2.37491	0.0851058
	1632234_at	FBgn0027080	TyrRS	0.243067	4.40329	3.70521	0.0052487	0.111058	-2.37629	0.084999
	1629705_at	FBgn0086254	CG6084	-0.273432	6.81569	-3.70498	0.00525052	0.111058	-2.37664	0.0849711
	1633407_at	FBgn0037956	CG6959	-0.272244	4.03027	-3.7017	0.00527657	0.11136	-2.38174	0.0845757
	1635123_at	FBgn0015391	glu	0.240257	1.10503	3.70072	0.00528432	0.1114	-2.38325	0.0844586
	1632761_at	FBgn0083942	CG34106	-0.566761	3.53637	-3.6999	0.00529087	0.111414	-2.38453	0.08436
	1637465_at	FBgn0051157	CG31157	-0.364772	3.76718	-3.69619	0.00532062	0.111916	-2.39031	0.0839149
	1631114_a_at	FBgn0025702	Srpk79D	-0.252164	3.63236	-3.68997	0.00537085	0.112847	-2.39998	0.0831739
	1624914_at	FBgn0033297	Mal-A8	0.52933	6.34308	3.68874	0.0053808	0.112931	-2.40189	0.0830287
	1635411_at	FBgn0052652	lncRNA:CR32652	-0.299223	9.03695	-3.68531	0.00540878	0.113068	-2.40723	0.082623
	1629846_at	FBgn0036836	CG11619	-0.408704	1.93671	-3.6853	0.00540884	0.113068	-2.40724	0.0826221
	1630756_at	FBgn0026060	Mipp2	0.311232	2.59939	3.68505	0.0054109	0.113068	-2.40763	0.0825924
	1630756_at	FBgn0029840	raptor	0.311232	2.59939	3.68505	0.0054109	0.113068	-2.40763	0.0825924
	1635757_at	FBgn0037163	laza	0.268486	3.20484	3.68369	0.00542199	0.113068	-2.40974	0.0824327
	1634494_at	FBgn0031364	CG17648	-0.275983	4.66251	-3.683	0.00542767	0.113068	-2.41082	0.0823513
	1641188_a_at	FBgn0027574	CG5815	-0.337409	1.57614	-3.68296	0.00542799	0.113068	-2.41088	0.0823467
	1637077_s_at	FBgn0024989	CG3777	-0.307503	1.99632	-3.68236	0.00543292	0.113068	-2.41182	0.082276
	1632116_at	FBgn0053234	CG33234	-0.325244	2.47681	-3.68126	0.00544196	0.113068	-2.41353	0.0821469
	1636055_at	FBgn0001217	Hsc70-2	-0.303101	6.55126	-3.68088	0.00544513	0.113068	-2.41413	0.0821017
	1630973_at	FBgn0266375	IP3K2	0.366691	1.35889	3.68065	0.00544699	0.113068	-2.41448	0.0820752
	1624152_at	FBgn0039293	Alg9	0.347756	2.36879	3.67638	0.00548226	0.113676	-2.42113	0.0815758
	1634772_at	FBgn0250845	CG1288	-0.262805	7.74757	-3.67504	0.00549339	0.113782	-2.42321	0.0814195
	1638800_a_at	FBgn0036093	CG14154	-0.269869	5.62937	-3.67308	0.00550968	0.113982	-2.42626	0.0811919
	1632800_at	FBgn0032554	CG15278	-0.30153	4.14354	-3.67243	0.00551508	0.113982	-2.42727	0.0811166
	1636309_at	FBgn0037838	TTLL15	-0.2389	1.50157	-3.66754	0.00555608	0.114622	-2.4349	0.08055
	1639502_at	FBgn0259896	NimC1	0.545455	2.20416	3.66563	0.00557221	0.114622	-2.43788	0.0803293
	1634136_at	FBgn0030244	CG2157	-0.444862	2.53617	-3.66541	0.00557405	0.114622	-2.43822	0.0803041
	1638367_at	FBgn0027525	LTV1	0.289603	5.86903	3.66515	0.0055762	0.114622	-2.43862	0.0802748
	1627834_a_at	FBgn0000114	bru1	-0.260721	6.99367	-3.66514	0.00557627	0.114622	-2.43863	0.0802739
	1628833_at	FBgn0028848	Gpo3	-0.268157	6.55527	-3.6623	0.00560037	0.114903	-2.44307	0.0799468
	1634189_at	FBgn0032700	CG10338	-0.313691	3.37285	-3.6621	0.00560205	0.114903	-2.44338	0.079924
	1633238_at	FBgn0063491	GstE9	0.460646	0.692116	3.65823	0.00563497	0.115399	-2.44941	0.0794816
	1637126_at	FBgn0032371	CG4983	-0.270308	7.54685	-3.65777	0.00563888	0.115399	-2.45013	0.0794294
	1625200_at	FBgn0261554	CG42672	0.23646	0.403686	3.65672	0.00564784	0.115399	-2.45176	0.07931
	1635951_at	FBgn0038952	CG7069	-0.417004	5.06474	-3.6564	0.00565063	0.115399	-2.45227	0.0792729
	1640404_at	FBgn0037402	Vha14-2	-0.323691	4.44617	-3.65276	0.00568181	0.115773	-2.45793	0.0788604
	1637219_at	FBgn0033442	CG1690	-0.30568	7.21112	-3.65142	0.00569341	0.115773	-2.46003	0.0787082
	1634341_a_at	FBgn0039152	Root	-0.390479	4.49646	-3.65089	0.00569795	0.115773	-2.46085	0.0786487
	1629578_at	FBgn0033902	eIF3m	0.242989	5.92198	3.65037	0.00570248	0.115773	-2.46167	0.0785894
	1628307_at	FBgn0036121	CG6310	-0.272619	7.88118	-3.64994	0.00570616	0.115773	-2.46233	0.0785413
	1628307_at	FBgn0250849	CG32388	-0.272619	7.88118	-3.64994	0.00570616	0.115773	-2.46233	0.0785413
	1628307_at	FBgn0263387	CG43439	-0.272619	7.88118	-3.64994	0.00570616	0.115773	-2.46233	0.0785413
	1638175_at	FBgn0020272	mst	0.238368	0.430448	3.64951	0.0057099	0.115773	-2.46301	0.0784925
	1623506_s_at	FBgn0023177	Pp4-19C	0.26242	3.04501	3.6493	0.00571168	0.115773	-2.46333	0.0784693
	1636242_at	FBgn0044047	Ilp6	-0.517212	2.20618	-3.64781	0.00572461	0.115911	-2.46566	0.0783012
	1631512_at	FBgn0032507	CG9377	0.568125	1.60294	3.64639	0.00573699	0.116038	-2.46788	0.0781409
	1623481_at	FBgn0030703	MSBP	0.294348	6.89214	3.64311	0.00576559	0.116368	-2.473	0.0777731
	1624794_at	FBgn0039246	CG10845	-0.245083	6.38368	-3.64	0.00579284	0.11679	-2.47785	0.0774258
	1637546_at	FBgn0000100	RpLP0	0.24913	8.67231	3.63757	0.00581428	0.11679	-2.48165	0.0771547
	1623238_at	FBgn0036975	CG5618	-0.366353	4.55576	-3.6375	0.00581486	0.11679	-2.48175	0.0771474
	1640599_at	FBgn0020513	Paics	0.457582	6.85151	3.63662	0.00582264	0.11679	-2.48313	0.0770496
	1635901_at	FBgn0039367	CG17197	-0.304434	3.47734	-3.63659	0.00582285	0.11679	-2.48316	0.0770469
	1626023_at	FBgn0032375	CG14932	-0.255665	3.79594	-3.63589	0.00582904	0.11679	-2.48426	0.0769691
	1636950_at	FBgn0039930	CG11077	0.26636	3.43576	3.63583	0.00582964	0.11679	-2.48436	0.0769616
	1638883_at	FBgn0029629	eIF3g1	0.246471	6.34186	3.63497	0.00583722	0.116818	-2.4857	0.0768667
	1626846_s_at	FBgn0031914	CG5973	0.248055	6.13414	3.63361	0.00584926	0.116924	-2.48782	0.0767165
	1632436_at	FBgn0031016	kek5	-0.236395	0.110788	-3.63273	0.0058571	0.116924	-2.4892	0.0766189
	1629355_at	FBgn0040001	FASN3	0.39573	6.00677	3.63207	0.00586298	0.116924	-2.49023	0.0765459
	1640363_a_at	FBgn0039464	CG6330	0.366018	5.80279	3.63109	0.00587173	0.116924	-2.49176	0.0764375
	1635683_at	FBgn0038332	CG6136	-0.35286	3.45096	-3.63025	0.00587916	0.116924	-2.49307	0.0763457
	1630063_a_at	FBgn0040227	eIF3d1	0.232897	5.28206	3.62905	0.00588989	0.116924	-2.49494	0.0762136
	1639425_at	FBgn0040963	CG18662	-0.260507	8.67557	-3.62883	0.00589188	0.116924	-2.49529	0.0761891
	1632089_at	FBgn0025629	CG4045	0.233356	1.80532	3.62536	0.00592304	0.117309	-2.50072	0.075808
	1633314_at	FBgn0034196	CG15605	-0.33174	5.49518	-3.62529	0.00592362	0.117309	-2.50082	0.075801
	1634383_a_at	FBgn0028425	JhI-21	0.266897	3.77519	3.6221	0.00595244	0.117459	-2.50581	0.0754519
	1631309_at	FBgn0030966	shop	0.317749	1.68222	3.62139	0.00595882	0.117459	-2.50691	0.0753752
	1631442_at	FBgn0042710	Hex-t2	-0.287718	7.06898	-3.62121	0.00596044	0.117459	-2.50719	0.0753556
	1631442_at	FBgn0042711	Hex-t1	-0.287718	7.06898	-3.62121	0.00596044	0.117459	-2.50719	0.0753556
	1624030_at	FBgn0023171	rnh1	-0.261269	4.3964	-3.62107	0.00596171	0.117459	-2.50741	0.0753403
	1630313_a_at	FBgn0265625	CG44433	-0.265201	6.28252	-3.62102	0.0059622	0.117459	-2.50749	0.0753345
	1630313_a_at	FBgn0265625	CG44433	-0.265201	6.28252	-3.62102	0.0059622	0.117459	-2.50749	0.0753345
	1630313_a_at	FBgn0265626	CG44434	-0.265201	6.28252	-3.62102	0.0059622	0.117459	-2.50749	0.0753345
	1630313_a_at	FBgn0265627	CG44435	-0.265201	6.28252	-3.62102	0.0059622	0.117459	-2.50749	0.0753345
	1637812_at	FBgn0050430	CG30430	-0.269461	9.34752	-3.61908	0.00597983	0.117684	-2.51053	0.0751232
	1640710_at	FBgn0028685	Rpt4	0.237013	5.02831	3.61792	0.00599039	0.11777	-2.51235	0.0749972
	1640466_s_at	FBgn0033879	Echs1	0.479284	5.89594	3.61637	0.00600447	0.117924	-2.51476	0.0748298
	1635263_at	FBgn0033519	CG11825	-0.604287	1.76041	-3.61365	0.00602934	0.11829	-2.51901	0.074536
	1624157_at	FBgn0033734	CG8520	-0.232622	6.31256	-3.61256	0.00603938	0.118308	-2.52072	0.0744181
	1629877_at	FBgn0042175	CG18858	0.324418	2.99669	3.61219	0.00604273	0.118308	-2.52129	0.0743789
	1629877_at	FBgn0051683	CG31683	0.324418	2.99669	3.61219	0.00604273	0.118308	-2.52129	0.0743789
	1624340_at	FBgn0019982	Gs1l	0.283713	5.52214	3.61013	0.00606174	0.118557	-2.52452	0.0741567
	1629433_at	FBgn0035228	CG12091	0.320307	6.79776	3.6079	0.00608234	0.118838	-2.52801	0.0739176
	1635694_at	FBgn0250840	CG12907	-0.310766	8.28879	-3.60505	0.00610873	0.11923	-2.53247	0.0736134
	1634095_at	FBgn0028737	eEF1beta	0.266042	8.23981	3.60108	0.00614574	0.119782	-2.53868	0.0731909
	1637662_at	FBgn0053548	SmydA-8	0.304403	4.01858	3.60067	0.00614964	0.119782	-2.53933	0.0731468
	1626980_at	FBgn0025574	Pli	-0.224931	3.92828	-3.59772	0.00617727	0.120146	-2.54394	0.0728348
	1622959_at	FBgn0261016	clos	-0.268759	1.02137	-3.59667	0.00618719	0.120146	-2.54559	0.0727236
	1626441_at	FBgn0031323	CG5139	-0.331336	6.5484	-3.595	0.00620296	0.1202	-2.5482	0.0725473
	1635056_at	FBgn0042133	CG18810	-0.245761	6.04945	-3.5944	0.00620855	0.1202	-2.54913	0.0724849
	1638046_at	FBgn0036751	Adgf-B	-0.232846	4.34175	-3.59434	0.00620914	0.1202	-2.54923	0.0724783
	1635054_at	FBgn0039796	CG12069	-0.293953	5.80735	-3.59187	0.00623253	0.120304	-2.55309	0.072219
	1641496_a_at	FBgn0039494	grass	-0.294231	3.47786	-3.59184	0.00623288	0.120304	-2.55315	0.0722151
	1623501_at	FBgn0040368	eIF4E7	-0.310349	5.29245	-3.59177	0.00623355	0.120304	-2.55326	0.0722077
	1640296_a_at	FBgn0025360	Optix	-0.35716	4.16561	-3.58944	0.00625567	0.120594	-2.5569	0.0719641
	1639846_at	FBgn0040375	CG13760	0.27838	1.28862	3.58885	0.00626131	0.120594	-2.55783	0.0719023
	1624768_at	FBgn0051407	CG31407	-0.285585	7.07732	-3.58671	0.00628178	0.120865	-2.56118	0.0716787
	1625499_at	FBgn0037995	CG3809	-0.245776	5.94511	-3.58504	0.00629778	0.12105	-2.5638	0.0715049
	1631051_at	FBgn0032883	Rhau	-0.334668	5.04028	-3.58337	0.00631379	0.121094	-2.56641	0.0713319
	1628592_at	FBgn0039782	CG15539	-0.402297	3.25467	-3.58292	0.00631816	0.121094	-2.56712	0.0712847
	1628348_at	FBgn0052081	CG32081	-0.263856	7.64081	-3.58281	0.00631923	0.121094	-2.56729	0.0712732
	1635453_at	FBgn0032049	Bace	-0.858243	6.4833	-3.58193	0.00632769	0.121134	-2.56867	0.0711822
	1638087_at	FBgn0053523	CG33523	0.278748	1.09538	3.58026	0.00634383	0.12132	-2.57129	0.0710093
	1638087_at	FBgn0053523	CG33523	0.278748	1.09538	3.58026	0.00634383	0.12132	-2.57129	0.0710093
	1641190_at	FBgn0035666	Jon65Aii	-1.17894	2.91729	-3.5764	0.00638125	0.121913	-2.57733	0.0706116
	1634861_at	FBgn0036440	CG17177	-0.666576	3.22592	-3.57243	0.00642	0.122529	-2.58355	0.0702044
	1632498_at	FBgn0031630	CG15629	-0.408029	2.60065	-3.57167	0.00642747	0.122549	-2.58475	0.0701264
	1638881_at	FBgn0031826	CG9550	-0.326549	6.02046	-3.57063	0.00643765	0.122609	-2.58637	0.0700205
	1633796_at	FBgn0037167	CG11425	0.376865	1.47594	3.56995	0.0064444	0.122609	-2.58745	0.0699504
	1627702_at	FBgn0086358	Tab2	0.265395	4.30274	3.5692	0.00645177	0.122609	-2.58863	0.069874
	1633450_at	FBgn0029661	CG16781	-0.279929	5.11512	-3.56871	0.00645653	0.122609	-2.58938	0.0698247
	1625427_at	FBgn0038304	CG12241	-0.246467	3.82746	-3.5668	0.00647543	0.122698	-2.59239	0.0696299
	1625312_at	FBgn0039324	CG10553	0.579846	6.9136	3.56627	0.00648064	0.122698	-2.59321	0.0695764
	1639857_at	FBgn0052068	Adi1	0.28291	6.49203	3.56622	0.00648117	0.122698	-2.5933	0.069571
	1635303_at	FBgn0010265	RpS13	0.223574	9.20467	3.56562	0.00648709	0.122698	-2.59424	0.0695102
	1637821_at	FBgn0052023	CG32023	0.325729	5.39719	3.56239	0.00651918	0.123182	-2.59931	0.0691831
	1626067_a_at	FBgn0028848	Gpo3	-0.243599	5.26098	-3.55923	0.00655067	0.123651	-2.60426	0.0688649
	1637079_at	FBgn0034300	CG5098	-0.251584	3.79295	-3.5586	0.00655704	0.123651	-2.60526	0.0688009
	1636631_at	FBgn0035300	CG1139	1.20513	2.43611	3.55676	0.0065755	0.123717	-2.60814	0.0686161
	1639033_at	FBgn0010482	l(2)01289	-0.33212	5.67678	-3.55655	0.00657753	0.123717	-2.60846	0.0685959
	1630673_at	FBgn0052240	CG32240	-0.27841	7.46317	-3.5563	0.00658012	0.123717	-2.60886	0.0685701
	1628672_at	FBgn0010309	pigeon	-0.219383	-0.0665019	-3.55511	0.00659204	0.123739	-2.61073	0.0684513
	1636920_s_at	FBgn0035436	CG12016	0.306949	5.9687	3.55488	0.00659439	0.123739	-2.61109	0.0684281
	1636920_s_at	FBgn0259933	CG42456	0.306949	5.9687	3.55488	0.00659439	0.123739	-2.61109	0.0684281
	1630093_at	FBgn0261596	RpS24	0.24034	8.78754	3.55322	0.00661112	0.123839	-2.61369	0.0682623
	1630093_at	FBgn0262714	Sap130	0.24034	8.78754	3.55322	0.00661112	0.123839	-2.61369	0.0682623
	1628852_at	FBgn0039503	CG14262	-0.28476	5.18474	-3.55299	0.00661342	0.123839	-2.61405	0.0682396
	1624855_at	FBgn0051988	CG31988	-0.252074	9.07666	-3.552	0.0066235	0.123839	-2.61562	0.0681402
	1632808_at	FBgn0032615	CG6012	0.726741	2.53174	3.55144	0.00662908	0.123839	-2.61648	0.0680853
	1635664_at	FBgn0011566	Smyd3	0.260754	1.36652	3.55112	0.00663234	0.123839	-2.61699	0.0680532
	1623536_s_at	FBgn0035542	DOR	-0.319863	7.04636	-3.5463	0.0066814	0.124632	-2.62455	0.0675747
	1639893_s_at	FBgn0014026	RpL7A	0.223702	8.25183	3.54388	0.00670622	0.124972	-2.62836	0.0673351
	1632146_a_at	FBgn0027579	mino	0.322441	7.18124	3.54235	0.00672185	0.12514	-2.63075	0.0671852
	1632146_a_at	FBgn0027579	mino	0.322441	7.18124	3.54235	0.00672185	0.12514	-2.63075	0.0671852
	1628736_at	FBgn0037454	CG1137	-0.284834	6.41818	-3.54163	0.00672934	0.125156	-2.6319	0.0671135
	1641315_at	FBgn0034463	CG15125	-0.250298	4.26554	-3.53761	0.00677082	0.125804	-2.63821	0.0667195
	1637271_a_at	FBgn0037486	CG14605	-0.335583	5.62434	-3.53642	0.00678314	0.12591	-2.64008	0.0666034
	1641654_a_at	FBgn0017581	Lk6	0.321929	7.62108	3.53241	0.00682486	0.126399	-2.64637	0.066213
	1640111_s_at	FBgn0031343	CG18131	-0.285476	5.84624	-3.53206	0.00682853	0.126399	-2.64692	0.0661788
	1640922_a_at	FBgn0004914	Hnf4	0.373082	5.1732	3.53197	0.00682952	0.126399	-2.64707	0.0661697
	1627105_at	FBgn0029752	TrxT	-0.293153	8.48178	-3.52994	0.00685074	0.1265	-2.65026	0.0659731
	1634301_at	FBgn0031721	CG14017	-0.337994	4.45077	-3.52979	0.00685232	0.1265	-2.65049	0.0659586
	1632282_s_at	FBgn0261627	CG42710	-0.287763	5.80167	-3.52954	0.006855	0.1265	-2.6509	0.0659338
	1630186_at	FBgn0033368	CG13743	-0.386201	2.32724	-3.52693	0.00688236	0.126759	-2.65499	0.0656824
	1640608_at	FBgn0023174	Prosbeta2	0.234497	5.9226	3.52615	0.00689063	0.126788	-2.65622	0.0656067
	1638296_at	FBgn0052064	S-Lap4	-0.258426	9.21899	-3.52282	0.00692583	0.127312	-2.66145	0.0652869
	1637099_at	FBgn0263774	CG43691	-0.318702	1.86183	-3.52116	0.00694354	0.127514	-2.66407	0.065127
	1626933_s_at	FBgn0035205	Ctr9	0.250425	3.72787	3.51992	0.00695666	0.127631	-2.66601	0.0650091
	1637936_at	FBgn0052512	CG32512	0.287249	4.28099	3.51778	0.00697959	0.127748	-2.66939	0.0648041
	1638225_a_at	FBgn0027106	Inx7	0.416063	3.23465	3.51758	0.00698175	0.127748	-2.6697	0.0647849
	1639956_at	FBgn0033756	CG17760	-0.371167	0.414206	-3.51687	0.00698934	0.127748	-2.67082	0.0647174
	1639571_s_at	FBgn0013275	Hsp70Aa	0.55348	1.13945	3.51646	0.00699367	0.127748	-2.67146	0.0646788
	1639571_s_at	FBgn0013276	Hsp70Ab	0.55348	1.13945	3.51646	0.00699367	0.127748	-2.67146	0.0646788
	1626003_s_at	FBgn0050461	CG30461	-0.270326	5.82391	-3.51618	0.00699674	0.127748	-2.67191	0.0646516
	1626003_s_at	FBgn0050462	ste24c	-0.270326	5.82391	-3.51618	0.00699674	0.127748	-2.67191	0.0646516
	1625872_at	FBgn0054021	CG34021	-0.272944	5.69287	-3.51384	0.00702182	0.128053	-2.67558	0.0644299
	1627152_at	FBgn0263260	sel	-0.253186	5.03659	-3.51333	0.00702731	0.128053	-2.67638	0.0643815
	1628437_at	FBgn0038448	CG12783	-0.259488	2.83475	-3.51274	0.00703374	0.128053	-2.67732	0.0643251
	1639605_at	FBgn0053993	CG33993	0.250282	0.183443	3.51125	0.00704981	0.128223	-2.67966	0.0641842
	1640229_at	FBgn0034435	fest	-0.28146	8.36415	-3.50784	0.00708669	0.128755	-2.68502	0.0638633
	1639413_at	FBgn0041102	ocn	-0.256843	9.95421	-3.5073	0.00709265	0.128755	-2.68588	0.0638118
	1631022_at	FBgn0033862	CG6209	-0.38722	5.94742	-3.50543	0.00711302	0.128858	-2.68882	0.0636361
	1637780_a_at	FBgn0270925	CG4836	-0.283022	9.7104	-3.50514	0.00711619	0.128858	-2.68928	0.0636089
	1640243_at	FBgn0032524	Hacd2	0.327484	3.33867	3.50464	0.00712163	0.128858	-2.69006	0.0635622
	1641363_at	FBgn0038706	CG3517	-0.260022	7.76572	-3.50428	0.00712554	0.128858	-2.69063	0.0635287
	1626204_at	FBgn0259098	CG42246	-0.431835	1.72651	-3.50074	0.00716431	0.129436	-2.6962	0.0631982
	1637501_a_at	FBgn0031127	CG1835	-0.304076	6.59481	-3.49945	0.00717851	0.129566	-2.69823	0.0630781
	1629978_at	FBgn0261287	ymp	-0.251098	7.48252	-3.49885	0.00718519	0.129566	-2.69918	0.0630217
	1638611_at	FBgn0052369	CG32369	0.40646	0.919388	3.49578	0.00721908	0.129917	-2.70401	0.0627373
	1640795_at	FBgn0032609	CG13280	-0.27439	5.24994	-3.49551	0.00722213	0.129917	-2.70444	0.0627117
	1625149_at	FBgn0036749	CG7460	0.350801	0.583372	3.49463	0.0072319	0.129917	-2.70583	0.0626302
	1627002_at	FBgn0030121	Cfp1	0.429266	1.44185	3.49402	0.00723859	0.129917	-2.70678	0.0625746
	1626106_a_at	FBgn0027532	CG7139	0.264019	4.40984	3.49399	0.00723893	0.129917	-2.70683	0.0625717
	1626653_a_at	FBgn0266268	FeCH	0.256262	4.16069	3.49236	0.00725711	0.129971	-2.7094	0.062421
	1624306_at	FBgn0039369	CG17195	-0.298644	4.7122	-3.49209	0.00726007	0.129971	-2.70982	0.0623966
	1625850_at	FBgn0002985	odd	-0.36306	2.46883	-3.49187	0.00726253	0.129971	-2.71017	0.0623762
	1641180_a_at	FBgn0263750	CG43675	-0.262733	6.74941	-3.49067	0.00727597	0.130089	-2.71206	0.0622654
	1641180_a_at	FBgn0266410	CG45050	-0.262733	6.74941	-3.49067	0.00727597	0.130089	-2.71206	0.0622654
	1641180_a_at	FBgn0266410	CG45050	-0.262733	6.74941	-3.49067	0.00727597	0.130089	-2.71206	0.0622654
	1641180_a_at	FBgn0266410	CG45050	-0.262733	6.74941	-3.49067	0.00727597	0.130089	-2.71206	0.0622654
	1628834_a_at	FBgn0261270	SelD	0.261003	2.98623	3.48818	0.0073039	0.130449	-2.71599	0.0620363
	1632587_s_at	FBgn0035197	CG9130	-0.241727	9.10821	-3.48694	0.00731781	0.130449	-2.71794	0.0619228
	1632587_s_at	FBgn0035198	CG9133	-0.241727	9.10821	-3.48694	0.00731781	0.130449	-2.71794	0.0619228
	1639344_at	FBgn0052651	CG32651	-0.324238	4.18833	-3.48677	0.0073197	0.130449	-2.71821	0.0619074
	1625071_a_at	FBgn0002773	Mlc2	-0.36559	8.06083	-3.48642	0.00732365	0.130449	-2.71876	0.0618753
	1634917_at	FBgn0026372	RpL23A	0.224574	9.1807	3.48387	0.00735236	0.130761	-2.72278	0.0616428
	1632277_a_at	FBgn0026428	HDAC6	0.299275	4.67266	3.48364	0.00735497	0.130761	-2.72314	0.0616217
	1640628_at	FBgn0033794	CG13326	-0.256019	4.52003	-3.48163	0.00737767	0.131042	-2.7263	0.0614392
	1626377_at	FBgn0037727	Nepl12	0.561894	1.36846	3.47898	0.00740786	0.131446	-2.73049	0.0611981
	1623995_at	FBgn0037328	RpL35A	0.231088	8.64718	3.47841	0.00741429	0.131446	-2.73138	0.061147
	1625962_at	FBgn0262955	RpII140	0.333269	3.34331	3.47631	0.00743835	0.131651	-2.7347	0.0609566
	1633093_at	FBgn0037040	CG12983	-0.293383	5.31323	-3.47577	0.00744446	0.131651	-2.73554	0.0609084
	1627111_at	FBgn0029148	NHP2	0.233998	3.56176	3.47558	0.00744671	0.131651	-2.73585	0.0608906
	1625670_at	FBgn0030033	CG1387	-0.249318	4.95663	-3.47266	0.00748019	0.132052	-2.74045	0.0606281
	1637689_at	FBgn0032404	RpL7-like	0.23268	4.61993	3.47239	0.00748331	0.132052	-2.74088	0.0606038
	1632629_a_at	FBgn0029663	CG10804	-0.269888	1.95366	-3.47149	0.00749363	0.132111	-2.74229	0.0605234
	1628539_at	FBgn0051174	CG31174	-0.304236	5.854	-3.4705	0.00750507	0.13219	-2.74386	0.0604345
	1624885_at	FBgn0052645	CG32645	0.3266	1.2426	3.46952	0.0075164	0.132266	-2.7454	0.0603467
	1630818_at	FBgn0050178	CG30178	-0.278032	5.36355	-3.46682	0.00754766	0.132637	-2.74966	0.0601059
	1634531_at	FBgn0040812	CG8750	-0.291074	5.88331	-3.46649	0.00755146	0.132637	-2.75018	0.0600767
	1640212_at	FBgn0052228	CG32228	-0.375558	2.70599	-3.46438	0.00757607	0.132796	-2.75351	0.0598886
	1628543_a_at	FBgn0000636	Fas3	-0.236384	2.54893	-3.46404	0.00758	0.132796	-2.75404	0.0598587
	1634844_at	FBgn0031092	CG9577	0.300589	4.7819	3.46391	0.00758155	0.132796	-2.75425	0.0598469
	1635996_at	FBgn0035911	CG6638	0.304311	3.32508	3.46159	0.00760863	0.133088	-2.75791	0.0596415
	1633108_at	FBgn0036372	Abp1	0.302884	2.74784	3.46107	0.00761482	0.133088	-2.75874	0.0595948
	1633108_at	FBgn0036372	Abp1	0.302884	2.74784	3.46107	0.00761482	0.133088	-2.75874	0.0595948
	1626931_a_at	FBgn0039713	RpS8	0.219145	9.30916	3.46069	0.00761928	0.133088	-2.75934	0.0595612
	1636368_at	FBgn0029658	CG14269	-0.313608	5.20802	-3.45909	0.00763802	0.133293	-2.76186	0.0594203
	1635946_at	FBgn0267363	JYalpha	-0.239401	3.58136	-3.45796	0.00765134	0.133374	-2.76365	0.0593206
	1635946_at	FBgn0267363	JYalpha	-0.239401	3.58136	-3.45796	0.00765134	0.133374	-2.76365	0.0593206
	1637128_a_at	FBgn0053340	CG33340	-0.235139	9.80925	-3.45684	0.00766455	0.133374	-2.76541	0.059222
	1632885_at	FBgn0011666	msi	-0.258266	6.17238	-3.45658	0.00766758	0.133374	-2.76582	0.0591994
	1633220_at	FBgn0034505	CG16739	-0.308598	6.87945	-3.45625	0.00767143	0.133374	-2.76634	0.0591707
	1639925_at	FBgn0037828	tomboy20	-0.283861	7.42396	-3.45571	0.00767787	0.133374	-2.7672	0.0591228
	1639109_a_at	FBgn0023023	CRMP	0.265571	5.17971	3.45401	0.00769801	0.133592	-2.76988	0.0589737
	1637448_s_at	FBgn0010412	RpS19a	0.224919	9.2992	3.45346	0.00770449	0.133592	-2.77074	0.0589258
	1640341_s_at	FBgn0027836	Dgp-1	0.224719	4.39221	3.45278	0.00771256	0.133609	-2.77182	0.0588664
	1624605_at	FBgn0085204	CG34175	-0.27586	6.05502	-3.45072	0.00773712	0.133861	-2.77507	0.0586861
	1625273_at	FBgn0004170	sc	-0.249601	0.0955051	-3.45038	0.00774119	0.133861	-2.77561	0.0586563
	1638274_s_at	FBgn0015803	RtGEF	0.222632	5.93763	3.44877	0.00776037	0.133948	-2.77815	0.0585164
	1637549_at	FBgn0029740	CG12680	-0.316215	3.20418	-3.44807	0.00776882	0.133971	-2.77926	0.058455
	1632368_at	FBgn0037463	djl	-0.284361	7.15412	-3.44732	0.00777772	0.134003	-2.78044	0.0583904
	1638898_at	FBgn0062449	CG13197	-0.221596	5.08647	-3.44615	0.00779179	0.134124	-2.78229	0.0582887
	1634600_at	FBgn0030578	CG5347	-0.261374	3.31635	-3.44419	0.00781532	0.13438	-2.78538	0.0581193
	1624488_a_at	FBgn0037890	CG17734	-0.262633	6.19617	-3.44373	0.00782089	0.13438	-2.78611	0.0580794
	1630248_at	FBgn0038981	CG5346	-0.280744	4.30212	-3.44254	0.00783527	0.134505	-2.78799	0.0579765
	1630372_s_at	FBgn0000286	Cf2	-0.272897	2.8073	-3.4399	0.00786717	0.134846	-2.79216	0.0577495
	1639059_s_at	FBgn0000615	exu	-0.247574	7.56428	-3.43896	0.0078786	0.134846	-2.79364	0.0576686
	1629081_at	FBgn0003009	ord	-0.321999	1.85184	-3.43873	0.00788147	0.134846	-2.79402	0.0576483
	1634047_a_at	FBgn0036389	ssp2	0.302264	0.607459	3.43855	0.00788358	0.134846	-2.79429	0.0576335
	1634047_a_at	FBgn0263232	Nxf3	0.302264	0.607459	3.43855	0.00788358	0.134846	-2.79429	0.0576335
	1633539_s_at	FBgn0032525	Hsp60D	-0.278781	6.21196	-3.43535	0.00792264	0.135287	-2.79936	0.057359
	1634629_at	FBgn0025616	CG13359	-0.435516	4.29439	-3.43447	0.00793335	0.135287	-2.80074	0.0572843
	1624596_at	FBgn0051463	CG31463	1.04964	1.77429	3.43422	0.00793647	0.135287	-2.80114	0.0572625
	1639896_at	FBgn0262531	CG43085	0.294964	0.332207	3.4341	0.00793788	0.135287	-2.80132	0.0572526
	1630031_at	FBgn0002590	RpS5a	0.217232	8.85017	3.43315	0.00794961	0.135365	-2.80284	0.057171
	1627661_at	FBgn0024558	Dph5	0.242778	3.40225	3.43251	0.00795739	0.135376	-2.80384	0.057117
	1638819_at	FBgn0051712	CG31712	-0.252171	4.9795	-3.4273	0.00802161	0.136346	-2.81207	0.0566752
	1630891_at	FBgn0051010	CG31010	-0.256845	5.99837	-3.42341	0.00806989	0.136735	-2.81822	0.0563475
	1623606_at	FBgn0002593	RpLP1	0.224525	9.67863	3.42307	0.00807422	0.136735	-2.81877	0.0563183
	1623974_at	FBgn0039810	CG15549	-0.370514	3.65483	-3.4227	0.00807886	0.136735	-2.81936	0.056287
	1624460_s_at	FBgn0051624	CG31624	-0.237231	9.42184	-3.42202	0.00808724	0.136735	-2.82042	0.0562306
	1624460_s_at	FBgn0051988	CG31988	-0.237231	9.42184	-3.42202	0.00808724	0.136735	-2.82042	0.0562306
	1626009_s_at	FBgn0043792	CG30427	-0.295894	0.912084	-3.42198	0.00808777	0.136735	-2.82049	0.0562271
	1641501_a_at	FBgn0003380	Sh	-0.309454	4.21539	-3.41956	0.00811808	0.137118	-2.82432	0.0560241
	1627988_at	FBgn0003279	RpL4	0.226078	8.54963	3.41829	0.00813397	0.137118	-2.82632	0.0559183
	1623569_at	FBgn0015351	CG14906	0.546678	1.61678	3.41781	0.00814003	0.137118	-2.82708	0.055878
	1623569_at	FBgn0038455	CG14907	0.546678	1.61678	3.41781	0.00814003	0.137118	-2.82708	0.055878
	1626767_at	FBgn0024361	Tsp2A	0.405874	3.58764	3.41762	0.00814246	0.137118	-2.82739	0.0558619
	1634768_at	FBgn0035430	CG12009	-0.336024	1.31803	-3.41622	0.00816006	0.137118	-2.8296	0.0557454
	1623113_at	FBgn0033706	Vha36-2	-0.298814	5.58648	-3.41495	0.00817603	0.137118	-2.8316	0.0556401
	1628422_s_at	FBgn0031673	CG31650	-0.230352	5.20658	-3.4147	0.00817929	0.137118	-2.83201	0.0556187
	1638480_at	FBgn0014022	Rlb1	0.271361	0.44284	3.41468	0.00817945	0.137118	-2.83203	0.0556176
	1627679_at	FBgn0040371	CG12470	-0.270957	8.22639	-3.41384	0.00819014	0.137118	-2.83337	0.0555474
	1630750_at	FBgn0034362	CG5323	0.301722	4.80291	3.41347	0.00819475	0.137118	-2.83394	0.0555172
	1626924_a_at	FBgn0039681	CG7582	0.223038	8.84649	3.4134	0.00819572	0.137118	-2.83407	0.0555108
	1626924_a_at	FBgn0261592	RpS6	0.223038	8.84649	3.4134	0.00819572	0.137118	-2.83407	0.0555108
	1629402_at	FBgn0029722	CG7024	-0.290848	5.22597	-3.41327	0.00819729	0.137118	-2.83426	0.0555006
	1631725_at	FBgn0028870	CG4691	-0.287196	8.89969	-3.41133	0.00822189	0.137342	-2.83733	0.0553399
	1626657_a_at	FBgn0039003	wfs1	0.399209	2.4987	3.41107	0.00822518	0.137342	-2.83774	0.0553185
	1631376_at	FBgn0250843	Prosalpha6	0.236293	5.54891	3.40919	0.00824919	0.137622	-2.84072	0.0551628
	1631376_at	FBgn0250843	Prosalpha6	0.236293	5.54891	3.40919	0.00824919	0.137622	-2.84072	0.0551628
	1626574_at	FBgn0039916	Ekar	-0.393462	2.11691	-3.40809	0.0082632	0.13767	-2.84246	0.0550723
	1638014_at	FBgn0027617	CG5808	0.267451	0.523675	3.40776	0.00826745	0.13767	-2.84299	0.0550449
	1633749_at	FBgn0033873	CG6337	0.620329	2.52753	3.40726	0.00827385	0.13767	-2.84378	0.0550037
	1639391_at	FBgn0039051	CG17109	0.306017	2.58323	3.40098	0.00835455	0.138891	-2.85372	0.0544895
	1638984_s_at	FBgn0037525	CG17816	-0.233136	2.855	-3.39977	0.00837017	0.139028	-2.85563	0.054391
	1624821_at	FBgn0033320	CG8586	0.283791	4.41942	3.39623	0.00841616	0.13967	-2.86124	0.0541032
	1634830_at	FBgn0039088	CG10164	-0.269428	6.40042	-3.39557	0.00842474	0.13969	-2.86228	0.0540499
	1624581_at	FBgn0053481	dpr7	-0.225027	3.99913	-3.39069	0.00848867	0.140553	-2.87002	0.0536557
	1637728_at	FBgn0038123	CG8508	-0.278215	6.15917	-3.39046	0.00849164	0.140553	-2.87038	0.0536374
	1639416_at	FBgn0033191	CG1598	0.214481	4.71453	3.38918	0.00850852	0.14071	-2.87241	0.0535344
	1634880_s_at	FBgn0033512	CG12902	-0.237409	9.1982	-3.3876	0.00852925	0.14093	-2.8749	0.0534084
	1634880_s_at	FBgn0263271	CG43397	-0.237409	9.1982	-3.3876	0.00852925	0.14093	-2.8749	0.0534084
	1630670_at	FBgn0030539	CG1368	-0.241448	3.11664	-3.38429	0.00857318	0.141513	-2.88016	0.0531432
	1636311_at	FBgn0001128	Gpdh1	-0.272813	7.82291	-3.38365	0.00858164	0.141513	-2.88117	0.0530925
	1629858_at	FBgn0032969	CG2528	-0.276715	5.47332	-3.38325	0.00858696	0.141513	-2.8818	0.0530606
	1631470_at	FBgn0035124	ttm2	-0.268319	6.72997	-3.37776	0.00866024	0.142495	-2.8905	0.0526254
	1638847_s_at	FBgn0003517	sta	0.234186	8.4691	3.37766	0.0086616	0.142495	-2.89066	0.0526174
	1638847_s_at	FBgn0250906	Pgk	0.234186	8.4691	3.37766	0.0086616	0.142495	-2.89066	0.0526174
	1623295_at	FBgn0035776	CG8564	-0.263761	7.48011	-3.37633	0.00867945	0.142609	-2.89276	0.0525125
	1630845_at	FBgn0003462	Sod1	0.214275	8.74788	3.37603	0.00868355	0.142609	-2.89325	0.0524885
	1628650_at	FBgn0051538	CG31538	-0.298684	8.71939	-3.37301	0.00872421	0.143034	-2.89802	0.0522513
	1630471_at	FBgn0030747	CG4301	0.310144	1.96774	3.37299	0.00872451	0.143034	-2.89806	0.0522495
	1634307_at	FBgn0030685	Graf	0.525337	5.74571	3.37204	0.00873744	0.143122	-2.89957	0.0521746
	1636175_a_at	FBgn0033582	CG9084	0.432899	1.67132	3.37121	0.00874858	0.143181	-2.90088	0.0521102
	1629129_at	FBgn0014073	Tie	0.243168	2.49292	3.36721	0.00880304	0.143884	-2.90723	0.0517975
	1634313_s_at	FBgn0086710	RpL30	0.222571	8.17541	3.36694	0.00880672	0.143884	-2.90765	0.0517765
	1638373_at	FBgn0052161	CG32161	-0.284003	6.24077	-3.36524	0.00882994	0.144139	-2.91035	0.0516444
	1627821_s_at	FBgn0039900	Syt7	-0.230645	4.52482	-3.36464	0.00883825	0.14415	-2.91131	0.0515973
	1640590_at	FBgn0052195	CG32195	0.26937	3.5583	3.36325	0.00885727	0.144174	-2.91351	0.0514898
	1628884_at	FBgn0030310	PGRP-SA	-0.313898	3.35882	-3.3628	0.00886339	0.144174	-2.91421	0.0514553
	1623660_at	FBgn0028884	CG4892	-0.266875	3.99098	-3.36233	0.00886997	0.144174	-2.91497	0.0514184
	1630411_at	FBgn0034527	CG9945	-0.235113	0.79231	-3.36231	0.00887017	0.144174	-2.915	0.0514172
	1625783_at	FBgn0040674	CG9445	-0.241404	3.43159	-3.36067	0.00889281	0.144238	-2.9176	0.0512902
	1623652_at	FBgn0037988	CG14740	-0.274844	7.57432	-3.35951	0.00890883	0.144238	-2.91944	0.0512007
	1633890_at	FBgn0085413	CG34384	-0.395452	2.40039	-3.359	0.00891585	0.144238	-2.92025	0.0511616
	1627214_s_at	FBgn0036519	CG7650	-0.335603	1.71266	-3.35867	0.00892036	0.144238	-2.92077	0.0511365
	1623836_at	FBgn0011272	RpL13	0.212798	9.05654	3.35842	0.00892393	0.144238	-2.92118	0.0511167
	1629750_at	FBgn0003140	PpY-55A	-0.314404	4.9062	-3.35817	0.00892732	0.144238	-2.92156	0.0510978
	1623306_at	FBgn0027334	l(1)G0004	0.295691	2.24876	3.35724	0.00894017	0.144322	-2.92303	0.0510266
	1637187_at	FBgn0034844	CG9861	-0.230857	6.49859	-3.35573	0.00896119	0.144384	-2.92544	0.0509104
	1637710_at	FBgn0004167	kst	0.247625	4.8548	3.35537	0.00896621	0.144384	-2.92601	0.0508828
	1631670_at	FBgn0028987	Spn28F	-0.37593	8.35273	-3.35499	0.00897149	0.144384	-2.92661	0.0508537
	1636056_at	FBgn0010409	RpL18A	0.212554	9.39572	3.35473	0.00897517	0.144384	-2.92703	0.0508335
	1637647_at	FBgn0051148	Gba1a	1.26406	2.74463	3.35423	0.00898212	0.144384	-2.92782	0.0507953
	1630988_at	FBgn0051347	CG31347	-0.283538	5.26328	-3.35307	0.00899822	0.144408	-2.92965	0.0507071
	1639446_at	FBgn0028903	CG13243	-0.292951	5.66974	-3.35303	0.00899881	0.144408	-2.92972	0.0507038
	1640736_at	FBgn0030314	CG11696	-0.232044	4.95115	-3.35157	0.00901926	0.144613	-2.93204	0.0505922
	1636005_at	FBgn0034293	CG14495	0.343198	1.53971	3.35031	0.00903684	0.144711	-2.93403	0.0504967
	1627462_a_at	FBgn0038735	CG4662	-0.284549	4.7413	-3.35005	0.0090406	0.144711	-2.93446	0.0504763
	1637770_a_at	FBgn0035424	Larp4B	-0.215502	3.85434	-3.34809	0.00906815	0.14492	-2.93757	0.0503274
	1629400_at	FBgn0035753	RpL18	0.219774	8.49542	3.34703	0.00908299	0.14492	-2.93924	0.0502476
	1625697_at	FBgn0025454	Cyp6g1	0.623451	9.28071	3.34685	0.0090856	0.14492	-2.93953	0.0502336
	1630912_at	FBgn0039698	CG7789	0.330216	2.28959	3.34624	0.00909418	0.14492	-2.9405	0.0501875
	1641661_at	FBgn0051016	CG31016	-0.246897	2.36356	-3.34572	0.00910156	0.14492	-2.94133	0.050148
	1634379_a_at	FBgn0004652	fru	0.24535	1.54437	3.34532	0.00910718	0.14492	-2.94196	0.050118
	1635268_at	FBgn0051806	CG31806	-0.283052	6.83118	-3.34351	0.0091328	0.145205	-2.94483	0.0499815
	1633818_at	FBgn0036179	CG7368	0.242093	0.175388	3.3424	0.0091485	0.145333	-2.94659	0.0498981
	1640915_at	FBgn0034802	CNBP	0.216288	5.39413	3.34112	0.00916681	0.145502	-2.94863	0.0498013
	1623009_at	FBgn0028382	cyp33	0.301054	2.46152	3.34037	0.00917749	0.145532	-2.94982	0.0497451
	1638802_at	FBgn0051415	CG31415	-0.227181	6.24508	-3.33913	0.00919521	0.145532	-2.95179	0.0496519
	1636287_at	FBgn0035619	Alp10	-1.03738	3.1861	-3.33895	0.00919772	0.145532	-2.95207	0.0496387
	1629159_at	FBgn0028919	CG16865	0.297414	1.60391	3.33883	0.00919944	0.145532	-2.95226	0.0496298
	1636918_a_at	FBgn0263048	Gpdh3	-0.285154	7.09278	-3.33783	0.0092138	0.145638	-2.95386	0.0495546
	1634057_at	FBgn0036703	CG7707	-0.225576	5.84456	-3.33568	0.00924457	0.14585	-2.95726	0.0493944
	1627837_at	FBgn0039564	Nep7	0.260189	0.790993	3.33524	0.00925092	0.14585	-2.95796	0.0493614
	1628629_at	FBgn0260959	MCPH1	-0.229028	6.13321	-3.33463	0.00925967	0.14585	-2.95893	0.0493161
	1627333_at	FBgn0037195	CG11226	-0.213844	4.88116	-3.33427	0.00926481	0.14585	-2.9595	0.0492895
	1630495_at	FBgn0050362	boly	-0.258415	7.02729	-3.33374	0.00927251	0.14585	-2.96035	0.0492498
	1640548_at	FBgn0040391	CG2854	-0.250446	4.35723	-3.33368	0.00927336	0.14585	-2.96044	0.0492454
	1640548_at	FBgn0053218	lncRNA:CR33218	-0.250446	4.35723	-3.33368	0.00927336	0.14585	-2.96044	0.0492454
	1625674_at	FBgn0039577	CG12516	-0.243544	5.35426	-3.33296	0.00928377	0.145892	-2.96159	0.0491917
	1637403_at	FBgn0028533	CG7953	0.628641	6.33534	3.33229	0.0092934	0.145906	-2.96265	0.0491422
	1635526_at	FBgn0031419	CG15390	-0.302022	0.27454	-3.33025	0.00932291	0.146023	-2.96589	0.048991
	1639532_at	FBgn0038943	CG5391	-0.343958	1.45174	-3.32852	0.0093481	0.146296	-2.96864	0.0488627
	1636377_at	FBgn0264908	pHCl-1	-0.288199	4.28096	-3.32791	0.00935695	0.146296	-2.96961	0.0488178
	1639949_s_at	FBgn0011284	RpS4	0.226855	9.16589	3.32685	0.00937236	0.146296	-2.97129	0.0487398
	1629534_at	FBgn0033888	CG18568	-0.297501	6.9393	-3.32666	0.0093751	0.146296	-2.97159	0.048726
	1629967_s_at	FBgn0041100	park	-0.234985	3.2668	-3.3264	0.00937895	0.146296	-2.97201	0.0487065
	1625700_a_at	FBgn0011241	CG46338	-0.207154	4.3429	-3.3253	0.00939496	0.146308	-2.97375	0.0486258
	1635833_at	FBgn0029753	CG4198	-0.296738	5.54766	-3.32511	0.00939772	0.146308	-2.97405	0.0486119
	1625994_a_at	FBgn0038474	mRpS11	0.222665	3.73634	3.32468	0.00940405	0.146308	-2.97474	0.0485801
	1639167_at	FBgn0034272	Ir54a	-0.212905	-0.040206	-3.32423	0.00941056	0.146308	-2.97545	0.0485475
	1628028_s_at	FBgn0029897	RpL17	0.233088	8.10486	3.32223	0.0094399	0.146552	-2.97863	0.0484008
	1627927_at	FBgn0264442	ab	0.211517	4.43481	3.32209	0.00944202	0.146552	-2.97886	0.0483902
	1639891_at	FBgn0036729	CG13733	-0.305836	6.20089	-3.3208	0.00946098	0.146552	-2.98091	0.0482959
	1639712_at	FBgn0031501	CG17261	-0.270743	7.722	-3.32039	0.00946699	0.146552	-2.98156	0.0482661
	1633283_at	FBgn0037899	RpL24-like	0.227671	6.52089	3.31977	0.00947618	0.146552	-2.98255	0.0482206
	1639052_a_at	FBgn0035283	CG12024	-0.266485	3.98546	-3.31896	0.00948804	0.146552	-2.98382	0.048162
	1631238_at	FBgn0011244	Hsp60B	-0.242561	7.52576	-3.3185	0.00949492	0.146552	-2.98457	0.0481281
	1637321_at	FBgn0000038	nAChRbeta1	-0.244449	5.19068	-3.31848	0.00949519	0.146552	-2.98459	0.0481267
	1637321_at	FBgn0000038	nAChRbeta1	-0.244449	5.19068	-3.31848	0.00949519	0.146552	-2.98459	0.0481267
	1641223_at	FBgn0036615	Tcs3	0.27945	0.847223	3.31786	0.00950437	0.146552	-2.98558	0.0480815
	1629713_at	FBgn0035194	Psf1	-0.293857	0.994526	-3.31713	0.00951517	0.146552	-2.98674	0.0480285
	1637706_at	FBgn0036780	CG7330	-0.585934	3.8396	-3.31643	0.00952544	0.146552	-2.98784	0.0479781
	1640472_at	FBgn0262109	lncRNA:CR42862	-0.23953	8.17919	-3.31634	0.00952682	0.146552	-2.98799	0.0479713
	1640633_s_at	FBgn0052425	CG32425	-0.241687	6.16917	-3.31222	0.00958804	0.147351	-2.99453	0.0476734
	1638028_at	FBgn0050484	CG30484	-0.309754	4.11656	-3.31146	0.00959949	0.147351	-2.99575	0.0476181
	1638028_at	FBgn0050485	CG30485	-0.309754	4.11656	-3.31146	0.00959949	0.147351	-2.99575	0.0476181
	1631128_s_at	FBgn0031751	CG9016	-0.237509	9.62348	-3.31107	0.00960536	0.147351	-2.99638	0.0475898
	1625526_at	FBgn0031861	CG17375	-0.299798	4.70157	-3.31061	0.00961222	0.147351	-2.99711	0.0475568
	1626797_a_at	FBgn0267326	Ntl	-0.264177	5.59655	-3.30999	0.00962143	0.147351	-2.99809	0.0475125
	1640204_at	FBgn0051619	nolo	-0.290627	4.17762	-3.30973	0.00962539	0.147351	-2.9985	0.0474935
	1631473_at	FBgn0053170	CG33170	-0.215615	3.26046	-3.30872	0.00964054	0.14737	-3.00011	0.0474209
	1626786_at	FBgn0033916	Usp20-33	-0.222253	3.78274	-3.30861	0.00964217	0.14737	-3.00028	0.047413
	1636435_at	FBgn0030536	CG11068	-0.286358	5.51399	-3.3072	0.0096633	0.147574	-3.00252	0.0473122
	1636082_at	FBgn0031045	CG14212	-0.294648	3.0202	-3.30667	0.00967129	0.147577	-3.00336	0.0472741
	1624117_at	FBgn0032723	ssp3	-0.226297	4.07653	-3.3058	0.00968445	0.147593	-3.00475	0.0472117
	1638417_at	FBgn0051373	CG31373	0.269555	5.47016	3.30557	0.00968796	0.147593	-3.00512	0.047195
	1622908_a_at	FBgn0030073	CG10962	0.358707	1.53146	3.30366	0.00971669	0.147912	-3.00815	0.0470592
	1622908_a_at	FBgn0264384	lncRNA:CR43836	0.358707	1.53146	3.30366	0.00971669	0.147912	-3.00815	0.0470592
	1623069_s_at	FBgn0032775	CG17544	-0.287737	3.46438	-3.30207	0.00974086	0.148161	-3.01068	0.0469456
	1624337_at	FBgn0004403	RpS14a	0.214874	6.47567	3.29972	0.00977665	0.148552	-3.01443	0.0467783
	1624337_at	FBgn0004404	RpS14b	0.214874	6.47567	3.29972	0.00977665	0.148552	-3.01443	0.0467783
	1624319_at	FBgn0262000	CG42818	0.235389	0.795284	3.29895	0.00978829	0.148552	-3.01564	0.0467242
	1635550_at	FBgn0038423	CG10317	-0.27012	6.79808	-3.29884	0.00979004	0.148552	-3.01582	0.0467161
	1624958_a_at	FBgn0031546	CG8851	-0.248399	5.00004	-3.298	0.00980285	0.148627	-3.01716	0.0466567
	1625758_s_at	FBgn0266581	pit	0.25857	1.24469	3.29687	0.00982006	0.148742	-3.01895	0.0465771
	1633476_at	FBgn0034629	Acox57D-d	-0.363826	2.22388	-3.29647	0.00982614	0.148742	-3.01958	0.046549
	1634784_at	FBgn0005596	yem	-0.25177	0.846829	-3.29573	0.0098376	0.148797	-3.02077	0.0464962
	1634784_at	FBgn0005596	yem	-0.25177	0.846829	-3.29573	0.0098376	0.148797	-3.02077	0.0464962
	1636343_at	FBgn0039474	CG6283	0.420751	5.86518	3.2945	0.00985636	0.148961	-3.02272	0.0464101
	1630455_at	FBgn0002607	RpL19	0.217372	9.63312	3.29344	0.0098727	0.14909	-3.02441	0.0463353
	1637518_at	FBgn0032061	CG9314	-0.321386	7.5719	-3.29218	0.00989219	0.149227	-3.02642	0.0462464
	1631719_at	FBgn0051109	CG31109	0.268694	2.19405	3.29146	0.00990327	0.149227	-3.02756	0.046196
	1627400_a_at	FBgn0030839	CG5613	-0.306663	1.10849	-3.29085	0.00991261	0.149227	-3.02853	0.0461536
	1626186_at	FBgn0037579	COX7AL	-0.254748	6.84959	-3.29081	0.0099133	0.149227	-3.0286	0.0461505
	1632095_at	FBgn0039366	CG17198	-0.346256	5.05071	-3.29006	0.00992484	0.149282	-3.02978	0.0460983
	1635321_at	FBgn0037819	CG14688	-0.297826	3.97944	-3.28931	0.00993648	0.149315	-3.03098	0.0460457
	1638196_at	FBgn0003863	alphaTry	-0.261173	9.44816	-3.2889	0.0099428	0.149315	-3.03163	0.0460172
	1640446_s_at	FBgn0034968	RpL12	0.208359	8.6536	3.287	0.00997232	0.14964	-3.03466	0.0458846
	1638529_at	FBgn0004888	Scsalpha1	0.274412	8.10073	3.28522	0.00999999	0.149908	-3.03748	0.0457609
	1634693_at	FBgn0032471	CG5122	-0.259283	5.69011	-3.28484	0.010006	0.149908	-3.0381	0.0457342
	1625552_at	FBgn0035718	CG14820	-0.438081	2.11735	-3.28409	0.0100177	0.149965	-3.03929	0.045682
	1640833_at	FBgn0250862	CG42237	-0.26442	2.56279	-3.28111	0.0100644	0.150524	-3.04403	0.0454758
	1627055_at	FBgn0036056	CG6709	-0.259992	5.89493	-3.27967	0.0100869	0.150524	-3.04632	0.0453767
	1627055_at	FBgn0036057	Hez	-0.259992	5.89493	-3.27967	0.0100869	0.150524	-3.04632	0.0453767
	1634828_at	FBgn0036529	Pgant8	0.234696	1.40009	3.278	0.0101134	0.150524	-3.04899	0.045261
	1627558_at	FBgn0011020	Sas-4	0.24703	0.275011	3.27748	0.0101215	0.150524	-3.04981	0.0452258
	1628282_at	FBgn0038488	m-cup	-0.276766	6.01621	-3.27705	0.0101284	0.150524	-3.0505	0.0451959
	1627985_a_at	FBgn0051870	CG31870	-0.285312	8.5537	-3.27493	0.0101619	0.150524	-3.05388	0.0450503
	1628826_at	FBgn0085317	CG34288	0.456134	2.33215	3.27452	0.0101684	0.150524	-3.05453	0.0450223
	1641215_s_at	FBgn0033241	CG2915	0.246805	3.81628	3.27315	0.0101902	0.150524	-3.05671	0.0449285
	1627500_at	FBgn0050345	CG30345	-0.289678	1.71716	-3.27309	0.0101911	0.150524	-3.0568	0.0449248
	1635601_at	FBgn0259237	CG42335	0.322949	0.313629	3.27248	0.0102008	0.150524	-3.05778	0.0448829
	1636157_at	FBgn0035064	TyrRS-m	0.314438	1.46582	3.27248	0.0102008	0.150524	-3.05778	0.0448829
	1636157_at	FBgn0035064	TyrRS-m	0.314438	1.46582	3.27248	0.0102008	0.150524	-3.05778	0.0448829
	1624307_at	FBgn0029660	CG10801	-0.37627	2.23131	-3.27178	0.010212	0.150524	-3.0589	0.044835
	1626316_at	FBgn0085377	CG34348	0.419975	1.07026	3.27168	0.0102136	0.150524	-3.05905	0.0448284
	1628744_s_at	FBgn0015808	ScpX	0.328092	5.29512	3.27141	0.0102179	0.150524	-3.05948	0.04481
	1628744_s_at	FBgn0032715	CG17597	0.328092	5.29512	3.27141	0.0102179	0.150524	-3.05948	0.04481
	1627874_at	FBgn0016080	xmas-1	-0.245457	3.99312	-3.27098	0.0102247	0.150524	-3.06016	0.0447809
	1627642_at	FBgn0040694	CG14974	-0.248458	6.85743	-3.27082	0.0102273	0.150524	-3.06042	0.0447696
	1629685_at	FBgn0035356	CG16986	0.341022	6.40296	3.27065	0.01023	0.150524	-3.06069	0.0447584
	1634976_at	FBgn0032061	CG9314	-0.287013	7.01805	-3.27056	0.0102315	0.150524	-3.06084	0.0447519
	1634976_at	FBgn0046873	Pif2	-0.287013	7.01805	-3.27056	0.0102315	0.150524	-3.06084	0.0447519
	1639128_at	FBgn0052988	CG32988	-0.278051	3.79569	-3.27034	0.010235	0.150524	-3.06119	0.0447369
	1637975_at	FBgn0013810	Dhc36C	-0.318372	3.80854	-3.2702	0.0102372	0.150524	-3.06141	0.0447276
	1629434_at	FBgn0035094	CG9380	0.290063	5.22164	3.27017	0.0102377	0.150524	-3.06146	0.0447253
	1627278_s_at	FBgn0031187	Usp2	-0.221585	5.88255	-3.26881	0.0102594	0.150629	-3.06362	0.044633
	1627155_s_at	FBgn0030624	CG9106	-0.246523	5.96526	-3.26873	0.0102607	0.150629	-3.06375	0.0446276
	1631323_a_at	FBgn0037323	CG2663	-0.647238	3.80579	-3.26678	0.0102919	0.15084	-3.06685	0.0444957
	1641289_at	FBgn0263396	sqd	0.219771	6.32858	3.26657	0.0102954	0.15084	-3.06719	0.0444811
	1625129_at	FBgn0033216	CG1946	0.802545	3.21555	3.26622	0.0103011	0.15084	-3.06775	0.0444573
	1638503_at	FBgn0036310	CG10969	-0.26913	4.13966	-3.26585	0.010307	0.15084	-3.06833	0.0444325
	1638343_at	FBgn0035359	CG1143	0.254079	3.50951	3.25952	0.0104094	0.152084	-3.07843	0.044006
	1641355_a_at	FBgn0039857	RpL6	0.211634	8.82046	3.25945	0.0104105	0.152084	-3.07853	0.0440016
	1633400_at	FBgn0011204	cue	0.233564	5.42154	3.25911	0.0104161	0.152084	-3.07907	0.0439788
	1639498_a_at	FBgn0267978	ap	-0.227891	3.56004	-3.25848	0.0104263	0.152117	-3.08008	0.0439365
	1633961_s_at	FBgn0000339	cni	0.233675	5.76164	3.25728	0.0104458	0.152188	-3.08198	0.0438567
	1626093_at	FBgn0035665	Jon65Aiii	-0.578537	8.65292	-3.2572	0.0104472	0.152188	-3.08212	0.0438507
	1639295_at	FBgn0033826	CG4734	-0.603494	4.18344	-3.25641	0.0104601	0.152247	-3.08338	0.0437982
	1623291_at	FBgn0051673	CG31673	0.256262	4.46612	3.25589	0.0104686	0.152247	-3.0842	0.0437635
	1633277_at	FBgn0003941	RpL40	0.203037	8.821	3.25547	0.0104754	0.152247	-3.08487	0.0437356
	1635260_at	FBgn0027363	Stam	-0.206283	5.18716	-3.25456	0.0104903	0.152328	-3.08632	0.0436752
	1625463_at	FBgn0004102	oc	-0.278763	0.408174	-3.25342	0.010509	0.152328	-3.08813	0.0435994
	1633687_at	FBgn0039177	shps	-0.22958	4.01019	-3.25317	0.0105131	0.152328	-3.08853	0.0435827
	1636653_at	FBgn0002930	nec	0.287811	5.73316	3.25037	0.0105594	0.152881	-3.09301	0.0433966
	1632404_at	FBgn0028468	rtet	0.244756	2.19742	3.24798	0.0105988	0.153335	-3.09681	0.0432391
	1623484_at	FBgn0003975	vg	-0.306293	1.2919	-3.2471	0.0106135	0.15343	-3.09822	0.0431808
	1633420_at	FBgn0026634	ldlCp	0.283674	0.442271	3.24651	0.0106232	0.153453	-3.09915	0.0431423
	1628114_s_at	FBgn0026379	Pten	-0.213851	3.92702	-3.2456	0.0106384	0.15347	-3.10061	0.0430823
	1627537_at	FBgn0034816	CG3085	-0.258702	6.4631	-3.24547	0.0106405	0.15347	-3.10081	0.0430737
	1628991_at	FBgn0019830	colt	0.236077	6.05905	3.24389	0.0106669	0.153717	-3.10333	0.0429699
	1633714_at	FBgn0031414	eys	0.269881	3.62616	3.24347	0.0106739	0.153717	-3.10401	0.0429423
	1626897_at	FBgn0037950	HisCl1	-0.332723	0.786331	-3.24199	0.0106986	0.153955	-3.10636	0.0428457
	1630862_at	FBgn0263113	Cc2d2a	-0.243102	0.299429	-3.24135	0.0107093	0.153993	-3.10739	0.0428036
	1639784_at	FBgn0020369	Rpt6	0.21551	5.55393	3.24014	0.0107296	0.154132	-3.10931	0.0427247
	1639784_at	FBgn0020369	Rpt6	0.21551	5.55393	3.24014	0.0107296	0.154132	-3.10931	0.0427247
	1631266_a_at	FBgn0038516	P5cr-2	0.378953	3.21757	3.2398	0.0107352	0.154132	-3.10985	0.0427029
	1631266_a_at	FBgn0038516	P5cr-2	0.378953	3.21757	3.2398	0.0107352	0.154132	-3.10985	0.0427029
	1636805_a_at	FBgn0030680	CG8944	0.218247	1.44401	3.23852	0.0107567	0.154323	-3.11188	0.0426197
	1632659_at	FBgn0261675	Npc1b	0.419911	0.819366	3.23801	0.0107654	0.154332	-3.11271	0.042586
	1627514_at	FBgn0038656	CG14294	-0.232009	5.8938	-3.2369	0.0107841	0.154482	-3.11447	0.0425142
	1634882_at	FBgn0015585	Acp63F	-0.231278	9.22178	-3.23575	0.0108035	0.154561	-3.11631	0.0424397
	1638868_at	FBgn0032929	Mcm10	-0.325588	1.16701	-3.2355	0.0108078	0.154561	-3.11671	0.0424232
	1637398_a_at	FBgn0000256	capu	-0.207906	5.87378	-3.23513	0.010814	0.154561	-3.1173	0.0423992
	1636128_at	FBgn0039041	CG13838	-0.288935	6.28749	-3.2337	0.0108382	0.154789	-3.11957	0.042307
	1633036_s_at	FBgn0030882	Gss1	0.254284	5.2578	3.23309	0.0108486	0.154821	-3.12055	0.0422675
	1633036_s_at	FBgn0052495	Gss2	0.254284	5.2578	3.23309	0.0108486	0.154821	-3.12055	0.0422675
	1631195_at	FBgn0050156	CG30156	-0.224337	5.6015	-3.23225	0.0108629	0.154871	-3.12189	0.0422132
	1631346_a_at	FBgn0050412	CG30412	-0.254755	6.95444	-3.2315	0.0108755	0.154871	-3.12308	0.0421651
	1625548_at	FBgn0036403	CG6661	-0.256023	6.72828	-3.23144	0.0108766	0.154871	-3.12318	0.0421613
	1637094_at	FBgn0032768	CG17564	-0.311837	5.7619	-3.22963	0.0109076	0.155095	-3.12608	0.0420443
	1635412_at	FBgn0035815	Snmp2	-0.297329	1.78906	-3.22956	0.0109087	0.155095	-3.12618	0.0420402
	1628402_a_at	FBgn0032135	GlcAT-S	-0.220454	4.49637	-3.22793	0.0109365	0.15533	-3.12878	0.0419357
	1630979_at	FBgn0032260	CG13144	-0.298552	0.388406	-3.22706	0.0109515	0.15533	-3.13017	0.0418798
	1634515_at	FBgn0033999	CG8093	0.61542	4.5872	3.22647	0.0109616	0.15533	-3.13111	0.0418419
	1632730_at	FBgn0031720	CG14013	-0.254043	5.61232	-3.22646	0.0109618	0.15533	-3.13113	0.0418413
	1635366_at	FBgn0038359	CG5614	-0.272919	7.5662	-3.2262	0.0109662	0.15533	-3.13154	0.0418248
	1635579_at	FBgn0030441	CG2209	-0.262795	5.28776	-3.22512	0.0109847	0.155476	-3.13326	0.0417559
	1630270_s_at	FBgn0020910	RpL3	0.228692	8.42948	3.22434	0.0109982	0.155551	-3.13451	0.041706
	1626873_a_at	FBgn0028857	CG12448	-0.229487	6.01523	-3.22375	0.0110084	0.155579	-3.13545	0.0416683
	1627794_a_at	FBgn0038327	Trax	-0.304987	2.31936	-3.22319	0.011018	0.155596	-3.13634	0.0416328
	1640059_at	FBgn0038679	CG6040	-0.24505	3.55136	-3.22225	0.0110342	0.155596	-3.13784	0.0415731
	1636829_at	FBgn0051902	Spn28Da	-0.291677	3.71813	-3.22143	0.0110484	0.155599	-3.13915	0.0415211
	1635437_at	FBgn0039274	CG11920	0.242414	2.06178	3.22129	0.0110509	0.155599	-3.13938	0.0415119
	1635183_at	FBgn0024293	Spn43Ab	0.322372	7.77394	3.22052	0.0110643	0.155672	-3.14061	0.0414629
	1626099_s_at	FBgn0023083	fray	-0.254586	5.99413	-3.21975	0.0110775	0.155742	-3.14183	0.0414145
	1638252_at	FBgn0010441	pll	0.221177	2.01799	3.21872	0.0110954	0.155878	-3.14347	0.0413494
	1627181_at	FBgn0032236	mRpS7	-0.234625	0.273407	-3.21795	0.0111089	0.155952	-3.14471	0.0413002
	1638077_at	FBgn0037101	CG7634	-0.239289	6.50275	-3.21705	0.0111245	0.156007	-3.14614	0.0412438
	1637978_at	FBgn0032790	CG10194	0.247163	2.36505	3.21645	0.0111349	0.156007	-3.14709	0.0412059
	1633479_a_at	FBgn0031407	CG4270	-0.250565	5.55238	-3.21589	0.0111448	0.156007	-3.14799	0.0411704
	1627662_at	FBgn0026315	Ugt35a	0.339068	3.89851	3.21552	0.0111511	0.156007	-3.14858	0.0411474
	1637665_at	FBgn0261641	CG42724	-0.20436	3.15263	-3.21499	0.0111604	0.156007	-3.14942	0.041114
	1634687_at	FBgn0035541	CG15019	0.241912	3.78393	3.21416	0.011175	0.156007	-3.15075	0.0410617
	1641401_s_at	FBgn0262612	CG43138	-0.314693	3.67665	-3.21346	0.0111872	0.156007	-3.15187	0.0410178
	1640429_a_at	FBgn0033853	CG6145	0.354713	6.32913	3.21346	0.0111874	0.156007	-3.15188	0.0410173
	1637909_at	FBgn0046698	Pp1-Y2	-0.255696	3.29674	-3.21248	0.0112044	0.156007	-3.15343	0.0409562
	1631359_s_at	FBgn0028670	Vha100-2	0.217001	6.04687	3.21247	0.0112046	0.156007	-3.15344	0.0409558
	1630122_at	FBgn0039518	CG13978	-0.241183	5.67764	-3.21227	0.0112082	0.156007	-3.15377	0.040943
	1629462_at	FBgn0050192	CG30192	-0.272663	6.32862	-3.20968	0.0112537	0.156479	-3.1579	0.040781
	1632170_a_at	FBgn0037831	Cap-H2	-0.249284	0.92361	-3.20852	0.0112743	0.156625	-3.15976	0.0407083
	1630640_at	FBgn0032161	CG4594	0.39879	2.52554	3.20792	0.0112849	0.156625	-3.16072	0.0406711
	1640426_at	FBgn0000579	Eno	-0.239167	7.0081	-3.20711	0.0112991	0.156625	-3.162	0.040621
	1640426_at	FBgn0051287	CG31287	-0.239167	7.0081	-3.20711	0.0112991	0.156625	-3.162	0.040621
	1631387_at	FBgn0050344	CG30344	-0.35063	4.54067	-3.20707	0.0113	0.156625	-3.16208	0.040618
	1631436_at	FBgn0004171	Mst98Cb	-0.285028	8.43621	-3.20608	0.0113175	0.156625	-3.16366	0.0405565
	1633467_a_at	FBgn0263032	CG43327	-0.286227	6.19533	-3.20596	0.0113195	0.156625	-3.16384	0.0405495
	1633467_a_at	FBgn0263033	CG43328	-0.286227	6.19533	-3.20596	0.0113195	0.156625	-3.16384	0.0405495
	1638310_at	FBgn0001565	Hlc	0.240607	4.89239	3.20582	0.0113221	0.156625	-3.16407	0.0405405
	1632081_s_at	FBgn0052626	AMPdeam	0.309867	1.29807	3.20495	0.0113375	0.156705	-3.16546	0.0404864
	1632081_s_at	FBgn0052626	AMPdeam	0.309867	1.29807	3.20495	0.0113375	0.156705	-3.16546	0.0404864
	1634104_a_at	FBgn0004924	Top1	-0.258676	3.13891	-3.20456	0.0113444	0.156705	-3.16608	0.0404625
	1627301_s_at	FBgn0038575	CG7208	-0.271061	5.55672	-3.20348	0.0113637	0.156812	-3.1678	0.0403955
	1623486_at	FBgn0037548	CG7900	0.398731	3.03269	3.2032	0.0113687	0.156812	-3.16825	0.0403781
	1636374_at	FBgn0027844	CAH1	0.230505	6.57024	3.20229	0.0113848	0.15692	-3.1697	0.0403221
	1641282_at	FBgn0034219	mthl4	-0.25955	3.10634	-3.20145	0.0113998	0.157013	-3.17104	0.0402703
	1639482_a_at	FBgn0052549	CG32549	0.280234	5.9096	3.20017	0.0114228	0.157215	-3.17309	0.040191
	1628600_at	FBgn0028857	CG12448	-0.249597	1.07599	-3.19829	0.0114566	0.157359	-3.17609	0.0400754
	1633930_at	FBgn0030277	CG1394	-0.279936	8.97995	-3.1982	0.0114581	0.157359	-3.17623	0.04007
	1623777_s_at	FBgn0033196	CG1358	-0.242729	4.49303	-3.1973	0.0114744	0.157468	-3.17768	0.0400144
	1631280_at	FBgn0030617	CG9095	-0.280291	1.42784	-3.19611	0.0114958	0.157647	-3.17957	0.0399419
	1630024_at	FBgn0035851	MED24	0.228156	1.60338	3.19455	0.0115239	0.157918	-3.18206	0.0398466
	1623402_at	FBgn0032859	Arpc2	0.25144	4.04532	3.19303	0.0115514	0.158132	-3.18449	0.0397538
	1628777_at	FBgn0033465	Etf-QO	0.397364	4.66673	3.19263	0.0115588	0.158132	-3.18514	0.0397289
	1633310_at	FBgn0032457	CG15483	-0.279728	4.55382	-3.19188	0.0115723	0.158132	-3.18632	0.0396837
	1623987_at	FBgn0031103	CG12679	-0.273918	6.6234	-3.19134	0.0115822	0.158146	-3.1872	0.0396503
	1632269_at	FBgn0002622	RpS3	0.197179	8.97903	3.18636	0.011673	0.159271	-3.19514	0.0393489
	1632269_at	FBgn0004913	Gnf1	0.197179	8.97903	3.18636	0.011673	0.159271	-3.19514	0.0393489
	1624717_s_at	FBgn0052647	CG32647	0.224878	5.70651	3.18521	0.0116941	0.159443	-3.19698	0.0392796
	1632051_at	FBgn0028474	CG4119	0.211388	2.44315	3.18342	0.0117271	0.159778	-3.19984	0.0391716
	1630254_at	FBgn0031462	CG2964	-0.262748	5.28663	-3.18101	0.0117715	0.160268	-3.20369	0.0390271
	1633109_at	FBgn0262109	lncRNA:CR42862	-0.247963	5.68722	-3.18001	0.0117901	0.160406	-3.20529	0.038967
	1635120_at	FBgn0262026	CG42837	0.269385	7.0983	3.17881	0.0118122	0.160591	-3.2072	0.0388956
	1635120_at	FBgn0265177	CG44242	0.269385	7.0983	3.17881	0.0118122	0.160591	-3.2072	0.0388956
	1635120_at	FBgn0265178	CG44243	0.269385	7.0983	3.17881	0.0118122	0.160591	-3.2072	0.0388956
	1635120_at	FBgn0265178	CG44243	0.269385	7.0983	3.17881	0.0118122	0.160591	-3.2072	0.0388956
	1636190_at	FBgn0032033	CG13392	0.248219	1.93354	3.17585	0.0118672	0.161101	-3.21193	0.0387192
	1630076_at	FBgn0004864	hop	0.22111	5.57504	3.17499	0.0118833	0.161101	-3.21331	0.0386679
	1623689_a_at	FBgn0037222	CG14642	-0.237964	3.0234	-3.17497	0.0118837	0.161101	-3.21334	0.0386668
	1628917_at	FBgn0250834	CG33308	-0.271676	6.20081	-3.17447	0.0118931	0.161113	-3.21415	0.0386368
	1626387_s_at	FBgn0002709	mei-218	-0.268451	3.74661	-3.17393	0.0119031	0.161134	-3.215	0.0386051
	1626387_s_at	FBgn0028581	mei-217	-0.268451	3.74661	-3.17393	0.0119031	0.161134	-3.215	0.0386051
	1624286_at	FBgn0001281	janB	-0.241846	8.03053	-3.17322	0.0119164	0.161199	-3.21614	0.0385629
	1625767_at	FBgn0050056	CG30056	-0.237825	6.7402	-3.17204	0.0119386	0.161384	-3.21803	0.0384929
	1635280_at	FBgn0039349	Ssadh	0.311069	5.07139	3.16904	0.011995	0.16203	-3.22282	0.0383159
	1639587_s_at	FBgn0037144	CG7458	-0.295102	1.76762	-3.16838	0.0120073	0.162082	-3.22387	0.0382773
	1639745_at	FBgn0025115	Acyp	-0.256196	6.46798	-3.16649	0.0120431	0.162303	-3.22689	0.0381661
	1623428_at	FBgn0040968	CG14933	0.388299	7.09968	3.16627	0.0120474	0.162303	-3.22726	0.0381528
	1623428_at	FBgn0259989	CG42486	0.388299	7.09968	3.16627	0.0120474	0.162303	-3.22726	0.0381528
	1624584_at	FBgn0052643	CG32643	-0.24668	5.48181	-3.16616	0.0120494	0.162303	-3.22743	0.0381466
	1630322_at	FBgn0026598	Apc2	-0.204827	0.120416	-3.1649	0.0120733	0.162444	-3.22944	0.0380726
	1630209_at	FBgn0052445	CG32445	-0.251925	7.09503	-3.1643	0.0120846	0.162444	-3.2304	0.0380378
	1625108_a_at	FBgn0002023	Lim3	-0.254617	2.87197	-3.16425	0.0120856	0.162444	-3.23048	0.0380347
	1626713_at	FBgn0037860	CG6629	-0.253769	6.18576	-3.16287	0.0121118	0.162616	-3.23268	0.0379543
	1628806_at	FBgn0014019	Rh5	0.227101	4.23598	3.16268	0.0121155	0.162616	-3.23299	0.0379429
	1634983_s_at	FBgn0052521	CG32521	0.260149	5.8121	3.16162	0.0121357	0.162771	-3.23468	0.0378813
	1629588_at	FBgn0039435	TwdlP	-0.295103	1.19936	-3.16078	0.0121517	0.162812	-3.23602	0.0378324
	1631039_at	FBgn0053108	CG33108	-0.280537	1.49039	-3.16056	0.0121559	0.162812	-3.23638	0.0378195
	1635745_a_at	FBgn0028479	Mtpalpha	0.339022	6.05321	3.1596	0.0121743	0.162943	-3.23791	0.0377637
	1628361_at	FBgn0052986	CG32986	-0.270134	2.43343	-3.15898	0.0121861	0.162986	-3.2389	0.0377277
	1623535_at	FBgn0031946	CG7164	-0.291059	7.40814	-3.15781	0.0122086	0.163172	-3.24078	0.0376598
	1631981_at	FBgn0037174	CG14457	0.322065	0.516167	3.15725	0.0122193	0.1632	-3.24167	0.0376275
	1628072_at	FBgn0030840	p-cup	-0.284508	4.18374	-3.1563	0.0122376	0.163309	-3.24319	0.0375724
	1630071_at	FBgn0085239	CG34210	-0.240784	5.11007	-3.15593	0.0122447	0.163309	-3.24378	0.0375512
	1630529_at	FBgn0031247	CG11562	-0.210274	7.09643	-3.15539	0.0122551	0.163331	-3.24464	0.0375199
	1636507_at	FBgn0040069	vanin-like	0.569896	2.3369	3.15464	0.0122696	0.163331	-3.24584	0.0374766
	1635677_a_at	FBgn0014388	sty	-0.236569	3.49608	-3.15451	0.0122722	0.163331	-3.24606	0.0374688
	1634118_at	FBgn0261357	CG42634	-0.23814	4.83489	-3.15383	0.0122853	0.16339	-3.24714	0.0374299
	1634118_at	FBgn0261358	CG42635	-0.23814	4.83489	-3.15383	0.0122853	0.16339	-3.24714	0.0374299
	1630969_s_at	FBgn0029662	CG12206	-0.405727	1.11349	-3.1527	0.0123072	0.163566	-3.24895	0.0373646
	1623004_a_at	FBgn0033285	CG18449	-0.253806	8.70777	-3.15221	0.0123166	0.163576	-3.24973	0.0373368
	1641078_s_at	FBgn0034025	Pgant1	-0.322676	1.99625	-3.15162	0.0123281	0.163599	-3.25068	0.0373026
	1624363_at	FBgn0030272	CG15201	0.25342	6.30638	3.1499	0.0123615	0.163829	-3.25343	0.037204
	1641348_at	FBgn0262123	l(2)41Ab	-0.252029	3.70492	-3.14868	0.0123852	0.164029	-3.25538	0.0371341
	1638537_at	FBgn0262869	Gfrl	-0.223325	0.11965	-3.14752	0.0124079	0.164214	-3.25723	0.0370679
	1638537_at	FBgn0262869	Gfrl	-0.223325	0.11965	-3.14752	0.0124079	0.164214	-3.25723	0.0370679
	1623297_at	FBgn0033893	CG18371	-0.289975	6.2354	-3.14536	0.0124502	0.164659	-3.26069	0.0369445
	1637193_at	FBgn0034258	eIF3c	0.227266	5.3169	3.14445	0.0124679	0.164778	-3.26214	0.0368933
	1627981_at	FBgn0052238	TTLL1B	-0.225716	5.20942	-3.14221	0.012512	0.165246	-3.26573	0.0367657
	1624202_a_at	FBgn0033286	CG2127	-0.238098	9.40634	-3.13988	0.012558	0.165394	-3.26946	0.036634
	1624810_at	FBgn0052774	Muc4B	-0.28824	0.778825	-3.13972	0.0125612	0.165394	-3.26972	0.0366248
	1628928_s_at	FBgn0025286	RpL31	0.201922	9.27146	3.13948	0.0125659	0.165394	-3.27009	0.0366115
	1626396_s_at	FBgn0029153	Menl-2	-0.229972	6.08994	-3.13947	0.0125661	0.165394	-3.27011	0.0366108
	1626396_s_at	FBgn0029154	Menl-1	-0.229972	6.08994	-3.13947	0.0125661	0.165394	-3.27011	0.0366108
	1627217_at	FBgn0015230	Glut3	-0.290807	4.47435	-3.13943	0.0125669	0.165394	-3.27017	0.0366087
	1623088_at	FBgn0033901	O-fut1	-0.242541	6.11856	-3.13636	0.0126278	0.166081	-3.27509	0.0364357
	1632720_at	FBgn0004431	LysX	0.240285	0.396796	3.13573	0.0126404	0.166131	-3.2761	0.0364002
	1627749_at	FBgn0032646	mEFTs	-0.223652	7.37325	-3.13518	0.0126512	0.166157	-3.27697	0.0363699
	1627963_s_at	FBgn0001216	Hsc70-1	-0.233141	5.93285	-3.13335	0.0126878	0.166408	-3.2799	0.0362671
	1625773_at	FBgn0036970	Spn77Bc	-0.292854	7.60711	-3.13249	0.012705	0.166518	-3.28128	0.0362191
	1640406_at	FBgn0051327	CG31327	-0.228677	3.80145	-3.132	0.0127148	0.166532	-3.28207	0.0361916
	1633192_at	FBgn0264744	CG44002	-0.210976	0.141976	-3.13084	0.0127381	0.166721	-3.28392	0.0361269
	1633192_at	FBgn0264745	CR44003	-0.210976	0.141976	-3.13084	0.0127381	0.166721	-3.28392	0.0361269
	1630353_at	FBgn0041004	CG17715	-0.296477	7.79106	-3.13027	0.0127495	0.16675	-3.28483	0.0360952
	1630353_at	FBgn0064912	CG31178	-0.296477	7.79106	-3.13027	0.0127495	0.16675	-3.28483	0.0360952
	1629584_at	FBgn0034721	CG11298	-0.258293	5.61	-3.12985	0.0127579	0.16675	-3.2855	0.036072
	1623885_at	FBgn0015568	alpha-Est1	0.340913	4.19262	3.12882	0.0127787	0.166835	-3.28716	0.0360144
	1629199_at	FBgn0020508	Ag5r2	-0.587735	3.10167	-3.12865	0.012782	0.166835	-3.28742	0.0360053
	1625833_at	FBgn0034808	CG9896	-0.351458	4.85613	-3.12784	0.0127984	0.166884	-3.28872	0.0359601
	1625367_at	FBgn0037734	trbd	-0.257334	3.75983	-3.12628	0.01283	0.166884	-3.29122	0.0358735
	1629040_at	FBgn0031881	MME1	0.196953	2.85155	3.12605	0.0128346	0.166884	-3.29159	0.0358609
	1640914_at	FBgn0031526	CG8838	-0.215595	7.19304	-3.12573	0.012841	0.166884	-3.2921	0.0358433
	1637349_at	FBgn0028695	Rpn1	0.195607	4.75225	3.12557	0.0128443	0.166884	-3.29235	0.0358344
	1640455_a_at	FBgn0038421	CG17931	-0.194794	6.9861	-3.1254	0.0128477	0.166884	-3.29262	0.0358252
	1640455_a_at	FBgn0259917	CG42446	-0.194794	6.9861	-3.1254	0.0128477	0.166884	-3.29262	0.0358252
	1638204_s_at	FBgn0026257	cav	-0.327367	3.15398	-3.12414	0.0128733	0.166884	-3.29464	0.0357554
	1624565_a_at	FBgn0036032	CG16711	-0.241655	3.8621	-3.12358	0.0128847	0.166884	-3.29554	0.0357244
	1637362_at	FBgn0086604	side-VIII	-0.26894	0.315126	-3.12289	0.0128986	0.166884	-3.29664	0.0356866
	1629568_at	FBgn0053276	Urm1	0.276766	1.21668	3.12288	0.0128988	0.166884	-3.29666	0.035686
	1638377_x_at	FBgn0010358	deltaTry	-0.845052	4.73158	-3.12283	0.0128998	0.166884	-3.29674	0.0356834
	1638377_x_at	FBgn0010359	gammaTry	-0.845052	4.73158	-3.12283	0.0128998	0.166884	-3.29674	0.0356834
	1638377_x_at	FBgn0050025	CG30025	-0.845052	4.73158	-3.12283	0.0128998	0.166884	-3.29674	0.0356834
	1638377_x_at	FBgn0050031	CG30031	-0.845052	4.73158	-3.12283	0.0128998	0.166884	-3.29674	0.0356834
	1638377_x_at	FBgn0262739	AGO1	-0.845052	4.73158	-3.12283	0.0128998	0.166884	-3.29674	0.0356834
	1635740_at	FBgn0015737	Hmu	0.224842	4.85765	3.12247	0.0129072	0.166884	-3.29732	0.0356634
	1629241_at	FBgn0016698	Ptpa	0.234224	2.55496	3.12205	0.0129158	0.166884	-3.29799	0.0356402
	1634085_at	FBgn0051204	CG31204	-0.209068	5.98346	-3.12195	0.0129178	0.166884	-3.29815	0.0356347
	1640523_at	FBgn0031660	mRpL28	0.219852	5.16739	3.12053	0.0129467	0.167048	-3.30042	0.0355569
	1626082_at	FBgn0039642	CG11882	-0.294772	2.37451	-3.12	0.0129574	0.167048	-3.30126	0.0355279
	1641068_a_at	FBgn0003495	spz	-0.215406	3.1476	-3.11938	0.0129703	0.167048	-3.30227	0.0354935
	1626849_at	FBgn0031723	CG7251	-0.221934	6.55209	-3.11922	0.0129733	0.167048	-3.30251	0.0354852
	1628379_at	FBgn0036328	CG10749	-0.26143	6.00883	-3.11916	0.0129746	0.167048	-3.30261	0.0354819
	1634696_at	FBgn0039004	Nup133	0.326061	1.24414	3.11845	0.0129893	0.167124	-3.30376	0.0354426
	1641117_a_at	FBgn0031195	CG17600	0.757507	3.20273	3.11242	0.0131133	0.168491	-3.31341	0.0351141
	1626531_at	FBgn0031655	Marcal1	0.243448	1.2819	3.1109	0.0131448	0.168781	-3.31584	0.0350317
	1634562_s_at	FBgn0243516	Vrp1	-0.258166	3.49009	-3.10899	0.0131843	0.16905	-3.31889	0.0349289
	1635080_at	FBgn0039491	CG6059	-0.246032	4.44402	-3.10885	0.0131873	0.16905	-3.31912	0.0349211
	1640269_at	FBgn0032654	CG15147	-0.215728	5.89536	-3.10828	0.0131992	0.16905	-3.32003	0.0348904
	1636450_at	FBgn0085446	CG34417	-0.401178	1.57026	-3.10749	0.0132157	0.16905	-3.3213	0.0348476
	1638427_at	FBgn0005355	Su(fu)	0.297437	1.8267	3.10738	0.013218	0.16905	-3.32148	0.0348417
	1637811_s_at	FBgn0040382	CG5273	0.235474	3.44749	3.10695	0.013227	0.16905	-3.32216	0.0348186
	1628369_at	FBgn0000206	boss	-0.244275	2.43375	-3.10658	0.0132346	0.16905	-3.32275	0.034799
	1628646_at	FBgn0028527	CG18507	0.387024	1.56721	3.10638	0.0132388	0.16905	-3.32307	0.0347881
	1624073_at	FBgn0034904	CG15800	-0.239011	5.52855	-3.10587	0.0132495	0.16905	-3.32389	0.0347606
	1640092_a_at	FBgn0001991	Ca-alpha1D	-0.277246	4.73512	-3.10561	0.013255	0.16905	-3.32431	0.0347466
	1631205_a_at	FBgn0086254	CG6084	0.278656	7.96723	3.10341	0.0133009	0.169518	-3.32782	0.034629
	1630354_at	FBgn0259184	CG42288	-0.243483	5.87192	-3.103	0.0133095	0.169518	-3.32848	0.034607
	1627178_at	FBgn0020509	Acp62F	-0.315052	9.30016	-3.10242	0.0133218	0.16956	-3.32942	0.0345757
	1636724_at	FBgn0032004	CG8292	-0.230711	6.27068	-3.10064	0.0133592	0.169873	-3.33226	0.0344808
	1641150_at	FBgn0264848	vih	-0.215099	6.40058	-3.09997	0.0133733	0.169873	-3.33333	0.0344453
	1626983_at	FBgn0262821	CG43192	-0.237282	1.01489	-3.09964	0.0133803	0.169873	-3.33386	0.0344277
	1626679_at	FBgn0038107	CG17327	0.250562	3.9381	3.09955	0.0133822	0.169873	-3.33401	0.0344227
	1626679_at	FBgn0265083	CG44194	0.250562	3.9381	3.09955	0.0133822	0.169873	-3.33401	0.0344227
	1632772_at	FBgn0030261	CG15203	0.329756	2.50879	3.09853	0.0134039	0.170034	-3.33565	0.0343682
	1623234_s_at	FBgn0013995	Calx	-0.263534	5.33301	-3.09771	0.0134211	0.170061	-3.33695	0.034325
	1630195_at	FBgn0033043	Or42b	0.228414	0.127716	3.09755	0.0134245	0.170061	-3.33721	0.0343166
	1635424_s_at	FBgn0045770	S-Lap3	-0.227959	9.03164	-3.09699	0.0134364	0.170061	-3.33811	0.0342868
	1634845_at	FBgn0033127	Tsp42Ef	-0.208875	4.24008	-3.09631	0.0134509	0.170061	-3.3392	0.0342505
	1629883_at	FBgn0263392	Tet	-0.238881	0.316249	-3.09631	0.0134509	0.170061	-3.3392	0.0342505
	1639634_at	FBgn0033954	CG12860	-0.224861	9.32669	-3.09413	0.0134973	0.170533	-3.34269	0.0341353
	1631393_at	FBgn0052459	CG32459	-0.281181	6.25376	-3.09348	0.0135112	0.170596	-3.34374	0.0341007
	1629542_at	FBgn0051821	CG31821	-0.390602	2.46763	-3.09043	0.0135764	0.171305	-3.34862	0.0339403
	1629345_at	FBgn0030943	Nup35	0.254654	1.9432	3.0894	0.0135985	0.171469	-3.35027	0.0338863
	1625521_at	FBgn0050355	CG30355	-0.261654	6.92499	-3.08892	0.0136087	0.171484	-3.35103	0.0338613
	1630305_at	FBgn0000659	fkh	0.259466	2.34183	3.08833	0.0136215	0.171531	-3.35199	0.0338302
	1623979_at	FBgn0032483	CG15482	-0.251482	5.99608	-3.08778	0.0136332	0.171564	-3.35286	0.0338018
	1623543_at	FBgn0027539	lili	-0.233959	3.69072	-3.08704	0.0136491	0.171651	-3.35404	0.033763
	1637612_at	FBgn0259824	Hip14	0.26258	2.86359	3.08659	0.0136589	0.17166	-3.35477	0.0337394
	1633826_at	FBgn0031305	Iris	0.416144	5.26949	3.08513	0.0136904	0.171856	-3.35711	0.0336633
	1624880_at	FBgn0031476	CG8813	-0.261273	7.28278	-3.08421	0.0137103	0.171856	-3.35858	0.0336152
	1625086_s_at	FBgn0040028	CG17450	-0.243484	6.39362	-3.08397	0.0137156	0.171856	-3.35897	0.0336026
	1625086_s_at	FBgn0052819	CG32819	-0.243484	6.39362	-3.08397	0.0137156	0.171856	-3.35897	0.0336026
	1625086_s_at	FBgn0052820	CG32820	-0.243484	6.39362	-3.08397	0.0137156	0.171856	-3.35897	0.0336026
	1624067_at	FBgn0033887	St4	-0.205171	0.751188	-3.08384	0.0137184	0.171856	-3.35918	0.033596
	1636180_at	FBgn0040064	yip2	0.463826	6.10809	3.08377	0.0137198	0.171856	-3.35928	0.0335925
	1640883_a_at	FBgn0027608	CG2082	-0.290295	3.55235	-3.08304	0.0137357	0.171941	-3.36046	0.0335544
	1626809_at	FBgn0263512	Vsx2	0.221447	0.173256	3.08204	0.0137575	0.172073	-3.36206	0.0335024
	1639590_at	FBgn0261671	tweek	0.214425	0.619255	3.08154	0.0137682	0.172073	-3.36286	0.0334767
	1626126_at	FBgn0033864	CG18368	-0.205373	4.79486	-3.0813	0.0137735	0.172073	-3.36324	0.0334642
	1625928_at	FBgn0038233	HtrA2	-0.227467	4.34438	-3.08042	0.0137927	0.1722	-3.36465	0.0334185
	1624444_at	FBgn0004172	Mst84Da	-0.215473	9.80792	-3.07921	0.0138192	0.172241	-3.3666	0.0333557
	1623398_at	FBgn0037996	CG4830	-0.883682	0.960169	-3.07867	0.0138308	0.172241	-3.36746	0.0333282
	1639136_s_at	FBgn0263102	psq	-0.30896	2.89009	-3.07844	0.0138358	0.172241	-3.36782	0.0333165
	1637098_at	FBgn0030622	CG9101	-0.319963	3.8339	-3.07719	0.0138633	0.172241	-3.36983	0.0332517
	1635128_a_at	FBgn0000139	ash2	0.232114	4.15955	3.07709	0.0138654	0.172241	-3.36999	0.0332467
	1639806_at	FBgn0021760	chb	-0.201205	6.73263	-3.07679	0.0138719	0.172241	-3.37046	0.0332314
	1633149_at	FBgn0019982	Gs1l	0.218308	2.78569	3.07674	0.0138731	0.172241	-3.37055	0.0332285
	1636688_at	FBgn0030615	Cyp4s3	0.492875	1.45643	3.07653	0.0138778	0.172241	-3.37089	0.0332176
	1632028_a_at	FBgn0019982	Gs1l	0.241137	4.57208	3.0758	0.0138937	0.172325	-3.37205	0.0331804
	1636016_at	FBgn0039707	Prtl99C	-0.223799	6.05673	-3.07338	0.0139471	0.172829	-3.37594	0.0330558
	1630106_at	FBgn0030358	CG10362	-0.222077	1.44301	-3.07313	0.0139525	0.172829	-3.37634	0.0330432
	1634593_at	FBgn0063670	CG40228	-0.227479	4.85027	-3.07244	0.0139677	0.172904	-3.37744	0.0330081
	1641320_s_at	FBgn0029896	CG3168	0.246127	7.40353	3.07181	0.0139817	0.172954	-3.37846	0.0329755
	1628269_at	FBgn0261396	Rpn3	0.204447	5.10237	3.07143	0.01399	0.172954	-3.37906	0.0329565
	1624629_at	FBgn0052119	CG32119	-0.237341	6.12668	-3.07081	0.0140038	0.173005	-3.38006	0.0329245
	1625789_at	FBgn0032677	CG5790	-0.236136	6.45196	-3.07009	0.0140197	0.173005	-3.38121	0.0328879
	1626793_at	FBgn0043792	CG30427	-0.534633	4.92582	-3.06978	0.0140265	0.173005	-3.3817	0.0328724
	1624505_at	FBgn0032264	Lip4	-0.530533	3.90412	-3.06933	0.0140367	0.173005	-3.38243	0.032849
	1632641_at	FBgn0037365	CG2104	-0.253686	2.97933	-3.06918	0.0140398	0.173005	-3.38266	0.0328418
	1637441_at	FBgn0035988	CG3982	-0.237873	8.74024	-3.06814	0.0140629	0.173167	-3.38433	0.0327888
	1623273_at	FBgn0039425	Ald2	-0.222604	5.56871	-3.06777	0.0140712	0.173167	-3.38493	0.0327699
	1623273_at	FBgn0263118	tx	-0.222604	5.56871	-3.06777	0.0140712	0.173167	-3.38493	0.0327699
	1631704_at	FBgn0039223	CG5805	0.220255	4.12858	3.06642	0.0141013	0.173425	-3.38709	0.0327014
	1632907_a_at	FBgn0033627	CG13204	0.35826	0.836037	3.06563	0.014119	0.17351	-3.38836	0.0326612
	1634912_at	FBgn0002780	mod	0.209875	4.87319	3.06529	0.0141265	0.17351	-3.3889	0.0326442
	1638101_at	FBgn0039742	CG15528	0.210648	3.28799	3.06298	0.0141783	0.173563	-3.39261	0.0325272
	1638399_at	FBgn0045479	Gr64a	-0.192079	0.11321	-3.06293	0.0141794	0.173563	-3.39268	0.0325249
	1641601_at	FBgn0051682	Tengl1	-0.245859	5.37666	-3.06288	0.0141804	0.173563	-3.39276	0.0325225
	1625150_s_at	FBgn0000559	eEF2	0.204106	9.50798	3.06262	0.0141862	0.173563	-3.39318	0.0325094
	1625150_s_at	FBgn0000559	eEF2	0.204106	9.50798	3.06262	0.0141862	0.173563	-3.39318	0.0325094
	1635728_a_at	FBgn0261552	ps	-0.202399	7.3336	-3.06255	0.0141878	0.173563	-3.39329	0.0325058
	1624092_at	FBgn0003358	Jon99Ci	-0.928341	5.71699	-3.06238	0.0141917	0.173563	-3.39357	0.032497
	1635408_at	FBgn0036785	CG13700	-0.214246	6.13431	-3.06219	0.0141959	0.173563	-3.39387	0.0324876
	1626905_at	FBgn0033982	Cyp317a1	0.227642	0.504116	3.06183	0.0142041	0.173563	-3.39445	0.0324693
	1634586_at	FBgn0263102	psq	-0.207864	-0.0674651	-3.06049	0.0142342	0.173676	-3.3966	0.0324019
	1638615_s_at	FBgn0032236	mRpS7	0.197706	8.88857	3.06027	0.0142392	0.173676	-3.39695	0.0323908
	1636303_at	FBgn0011761	dhd	-0.242682	0.799447	-3.05942	0.0142583	0.173676	-3.39831	0.0323483
	1634893_at	FBgn0001128	Gpdh1	-0.240026	7.99167	-3.0594	0.0142588	0.173676	-3.39835	0.0323472
	1641676_at	FBgn0031298	Atg4a	0.293135	4.335	3.05879	0.0142726	0.173676	-3.39933	0.0323165
	1641676_at	FBgn0031298	Atg4a	0.293135	4.335	3.05879	0.0142726	0.173676	-3.39933	0.0323165
	1640159_at	FBgn0261446	CG13377	-0.298421	2.71281	-3.05862	0.0142763	0.173676	-3.39959	0.0323082
	1626834_at	FBgn0035823	eIF4E5	-0.232203	7.43189	-3.05857	0.0142775	0.173676	-3.39967	0.0323057
	1640900_at	FBgn0038742	Arc42	0.310027	4.16772	3.05356	0.0143911	0.174945	-3.4077	0.0320556
	1638413_at	FBgn0036024	CG18180	-1.39187	5.47719	-3.05296	0.0144047	0.174998	-3.40866	0.0320259
	1628719_at	FBgn0025680	cry	0.270278	5.26716	3.05187	0.0144295	0.175188	-3.41041	0.0319718
	1639383_a_at	FBgn0034459	TTLL6A	-0.29815	5.2735	-3.05082	0.0144537	0.175304	-3.4121	0.0319193
	1628737_at	FBgn0033497	CG12912	0.242739	0.382536	3.05065	0.0144576	0.175304	-3.41238	0.0319109
	1630100_at	FBgn0263256	CG43394	-0.230885	3.76712	-3.04935	0.0144874	0.175455	-3.41446	0.0318466
	1638284_at	FBgn0038210	CG3199	-0.243261	7.06836	-3.0493	0.0144885	0.175455	-3.41454	0.0318441
	1633068_at	FBgn0259795	loopin-1	-0.225242	9.72361	-3.04734	0.0145335	0.175792	-3.41768	0.0317475
	1630231_at	FBgn0001083	fw	-0.287631	2.04461	-3.04707	0.0145398	0.175792	-3.41812	0.0317341
	1636767_at	FBgn0004429	LysP	0.471511	5.42178	3.04658	0.0145509	0.175792	-3.4189	0.0317101
	1625738_at	FBgn0037664	CG8420	-0.211955	4.62338	-3.04647	0.0145535	0.175792	-3.41907	0.0317047
	1630191_at	FBgn0052436	CG32436	-0.22853	6.81846	-3.04348	0.0146226	0.175851	-3.42387	0.0315576
	1624991_at	FBgn0036204	Tim13	-0.268963	6.58027	-3.04327	0.0146273	0.175851	-3.4242	0.0315478
	1634804_at	FBgn0260486	Ziz	0.202823	4.05155	3.04308	0.0146318	0.175851	-3.42451	0.0315383
	1634804_at	FBgn0260486	Ziz	0.202823	4.05155	3.04308	0.0146318	0.175851	-3.42451	0.0315383
	1628603_at	FBgn0036825	RpL26	0.196088	9.1937	3.04299	0.0146339	0.175851	-3.42466	0.0315338
	1633658_a_at	FBgn0053233	CG33233	-0.245921	4.28008	-3.04292	0.0146355	0.175851	-3.42476	0.0315305
	1633464_at	FBgn0085210	CG34181	-0.306516	2.67068	-3.04242	0.014647	0.175851	-3.42556	0.0315061
	1641014_at	FBgn0031129	CG1324	-0.290344	7.76626	-3.04162	0.0146657	0.175851	-3.42685	0.0314668
	1633582_at	FBgn0263397	Ih	-0.199047	5.28692	-3.04143	0.01467	0.175851	-3.42715	0.0314578
	1627270_at	FBgn0250869	CG42240	0.275932	4.95749	3.04097	0.0146808	0.175851	-3.4279	0.0314349
	1637498_at	FBgn0069938	CG41106	-0.205133	4.75112	-3.04057	0.0146901	0.175851	-3.42854	0.0314155
	1638091_at	FBgn0032647	CG15143	-0.278576	2.52847	-3.04019	0.0146989	0.175851	-3.42914	0.0313971
	1623359_at	FBgn0003459	stwl	-0.230175	1.03916	-3.03949	0.0147153	0.175851	-3.43027	0.0313627
	1626507_at	FBgn0030990	CG7556	0.206443	3.84758	3.03929	0.0147199	0.175851	-3.43058	0.0313532
	1630626_at	FBgn0082831	pps	0.274089	0.884037	3.039	0.0147266	0.175851	-3.43105	0.0313391
	1625011_at	FBgn0034720	Liprin-gamma	-0.216571	4.92503	-3.03889	0.0147292	0.175851	-3.43123	0.0313336
	1631533_at	FBgn0013773	Cyp6a22	0.383973	1.87806	3.03863	0.0147353	0.175851	-3.43165	0.031321
	1636543_a_at	FBgn0039690	Gnpnat	0.43938	3.10417	3.03858	0.0147364	0.175851	-3.43172	0.0313186
	1630784_a_at	FBgn0039594	snu	-0.209657	6.41342	-3.03849	0.0147385	0.175851	-3.43186	0.0313143
	1624869_at	FBgn0031729	CG12511	-0.280603	3.78405	-3.03819	0.0147455	0.175851	-3.43234	0.0312998
	1632361_at	FBgn0031814	retm	-0.224465	4.99753	-3.03806	0.0147487	0.175851	-3.43256	0.0312931
	1631833_at	FBgn0002781	mod(mdg4)	-0.229533	2.50302	-3.03786	0.0147533	0.175851	-3.43288	0.0312836
	1630373_at	FBgn0028897	CG4935	-0.223042	2.84594	-3.03665	0.0147814	0.176077	-3.43481	0.0312251
	1637300_at	FBgn0033356	CG8229	0.325895	3.83212	3.03434	0.0148357	0.176612	-3.43852	0.031113
	1640373_at	FBgn0028868	CG4701	-0.237925	5.7987	-3.03333	0.0148594	0.176768	-3.44014	0.0310643
	1624022_at	FBgn0031876	Atac1	0.221606	0.299194	3.03299	0.0148675	0.176768	-3.44069	0.0310478
	1639396_s_at	FBgn0039774	CDase	0.346907	2.43076	3.03208	0.014889	0.176849	-3.44216	0.0310037
	1638036_at	FBgn0004432	Cyp1	0.233609	8.46168	3.03187	0.0148939	0.176849	-3.44248	0.0309938
	1635327_at	FBgn0051206	CG31206	-0.268437	7.01274	-3.03098	0.0149149	0.176849	-3.44391	0.0309509
	1640751_at	FBgn0034776	CG13527	-0.241097	5.41581	-3.03013	0.014935	0.176849	-3.44527	0.0309101
	1640991_at	FBgn0052091	CG32091	-0.211496	3.63467	-3.02915	0.0149581	0.176849	-3.44684	0.0308632
	1636951_at	FBgn0035078	Tpc2	-0.380191	2.78906	-3.02866	0.0149698	0.176849	-3.44763	0.0308397
	1639598_at	FBgn0051482	CG31482	-0.214167	6.78142	-3.02846	0.0149747	0.176849	-3.44796	0.0308297
	1629634_at	FBgn0260970	Ubr3	-0.292755	2.16802	-3.02844	0.014975	0.176849	-3.44798	0.0308291
	1630964_at	FBgn0030234	CG15211	0.262068	4.00755	3.02771	0.0149923	0.176849	-3.44915	0.0307942
	1636040_at	FBgn0034583	CG10527	-0.198485	6.4445	-3.02768	0.0149931	0.176849	-3.4492	0.0307927
	1626789_at	FBgn0039203	CG13618	0.501177	3.69925	3.02747	0.0149981	0.176849	-3.44954	0.0307825
	1628779_a_at	FBgn0003651	svp	-0.283489	3.60362	-3.02741	0.0149995	0.176849	-3.44964	0.0307797
	1628941_at	FBgn0265726	Nna1	-0.250642	5.15115	-3.02665	0.0150177	0.176849	-3.45086	0.0307432
	1628941_at	FBgn0265726	Nna1	-0.250642	5.15115	-3.02665	0.0150177	0.176849	-3.45086	0.0307432
	1624599_at	FBgn0085360	CG34331	0.372682	5.7067	3.02648	0.0150216	0.176849	-3.45113	0.0307353
	1632120_at	FBgn0039768	CG15533	0.775569	1.65281	3.02616	0.0150293	0.176849	-3.45165	0.0307197
	1641100_at	FBgn0038208	CG14355	-0.242834	7.20677	-3.02601	0.0150329	0.176849	-3.45189	0.0307126
	1633533_at	FBgn0033872	CG6329	-0.217344	7.35934	-3.02582	0.0150373	0.176849	-3.45219	0.0307037
	1624521_a_at	FBgn0023537	CG17896	0.304136	6.0361	3.02561	0.0150423	0.176849	-3.45252	0.0306939
	1627638_s_at	FBgn0003676	CCT1	0.222796	4.06039	3.02502	0.0150565	0.176907	-3.45348	0.0306654
	1623832_a_at	FBgn0260453	CG17140	-0.218009	5.7507	-3.02436	0.0150723	0.176983	-3.45454	0.0306338
	1623832_a_at	FBgn0260454	CG17139	-0.218009	5.7507	-3.02436	0.0150723	0.176983	-3.45454	0.0306338
	1631549_s_at	FBgn0033836	CG18278	0.225166	1.41826	3.02363	0.0150896	0.177077	-3.4557	0.0305993
	1631549_s_at	FBgn0260475	CG30059	0.225166	1.41826	3.02363	0.0150896	0.177077	-3.4557	0.0305993
	1625747_at	FBgn0038747	RhoGAP92B	-0.248739	3.69954	-3.02275	0.0151107	0.177209	-3.45711	0.0305574
	1630731_at	FBgn0035414	CG14965	-0.208835	0.558497	-3.02238	0.0151196	0.177209	-3.45771	0.0305397
	1634147_a_at	FBgn0025777	homer	-0.243838	3.52877	-3.02045	0.015166	0.177643	-3.46081	0.0304481
	1635481_a_at	FBgn0030946	CG6659	-0.346564	2.50654	-3.01949	0.0151891	0.177693	-3.46235	0.0304028
	1635435_at	FBgn0050277	Oatp58Da	-0.253514	6.37958	-3.01862	0.0152099	0.177827	-3.46373	0.030362
	1635435_at	FBgn0050278	CG30278	-0.253514	6.37958	-3.01862	0.0152099	0.177827	-3.46373	0.030362
	1628608_at	FBgn0038481	CG17475	0.269199	3.39201	3.01731	0.0152415	0.17805	-3.46584	0.0303001
	1639774_at	FBgn0030271	CG15202	-0.263331	4.02903	-3.01642	0.0152631	0.17805	-3.46727	0.0302581
	1641179_at	FBgn0032590	CG4631	-0.286475	5.81555	-3.01629	0.0152662	0.17805	-3.46747	0.0302521
	1630421_at	FBgn0053170	CG33170	-0.204246	6.17088	-3.01626	0.0152669	0.17805	-3.46752	0.0302506
	1634463_at	FBgn0031004	CG7992	0.349566	3.47233	3.01589	0.0152759	0.17805	-3.46811	0.0302332
	1638207_at	FBgn0034151	CG15617	-0.385575	2.53899	-3.01504	0.0152967	0.178135	-3.46949	0.030193
	1625724_at	FBgn0264815	Pde1c	-0.229559	2.1755	-3.01443	0.0153114	0.178135	-3.47046	0.0301644
	1639479_a_at	FBgn0001320	kni	-0.254809	0.539949	-3.01395	0.015323	0.17816	-3.47123	0.030142
	1627504_at	FBgn0052440	CG32440	-0.236315	6.09983	-3.01283	0.0153503	0.178368	-3.47303	0.0300895
	1640714_at	FBgn0026563	CG1979	-0.212048	7.2267	-3.01134	0.0153865	0.178679	-3.47541	0.03002
	1625826_at	FBgn0035567	CG7514	-0.263056	5.0864	-3.01065	0.0154034	0.178767	-3.47653	0.0299875
	1625522_at	FBgn0052551	CG32551	0.301059	2.74802	3.00925	0.0154377	0.179044	-3.47877	0.0299223
	1625522_at	FBgn0264393	CG43841	0.301059	2.74802	3.00925	0.0154377	0.179044	-3.47877	0.0299223
	1638913_at	FBgn0259110	mmd	-0.294061	2.03122	-3.0089	0.0154463	0.179044	-3.47933	0.029906
	1631627_at	FBgn0000639	Fbp1	0.205315	3.92436	3.00715	0.0154892	0.179432	-3.48214	0.0298247
	1631627_at	FBgn0034365	CG5335	0.205315	3.92436	3.00715	0.0154892	0.179432	-3.48214	0.0298247
	1633776_s_at	FBgn0013300	ProtA	-0.241752	9.1728	-3.00603	0.0155167	0.179537	-3.48394	0.0297727
	1633776_s_at	FBgn0013301	ProtB	-0.241752	9.1728	-3.00603	0.0155167	0.179537	-3.48394	0.0297727
	1632695_at	FBgn0031929	CG18585	0.993646	3.39672	3.00601	0.0155172	0.179537	-3.48397	0.0297718
	1641614_at	FBgn0019936	RpS20	0.185952	8.9022	3.00473	0.0155488	0.179556	-3.48603	0.0297125
	1641614_at	FBgn0033159	Dscam1	0.185952	8.9022	3.00473	0.0155488	0.179556	-3.48603	0.0297125
	1628401_at	FBgn0051952	CG31952	-0.287796	4.37951	-3.00437	0.0155575	0.179556	-3.48659	0.0296961
	1630204_a_at	FBgn0037616	CG8136	-0.23497	7.44618	-3.00416	0.0155629	0.179556	-3.48695	0.029686
	1636153_at	FBgn0034191	CG6984	0.235549	1.6959	3.0036	0.0155767	0.179567	-3.48784	0.0296603
	1636504_a_at	FBgn0030780	CG13008	-0.241478	5.42979	-3.00246	0.0156048	0.179726	-3.48967	0.0296077
	1639170_at	FBgn0031925	Cyp4d21	-0.294234	5.2833	-3.00228	0.0156094	0.179726	-3.48996	0.0295993
	1636618_at	FBgn0003360	sesB	0.223435	0.781675	3.00093	0.0156428	0.17987	-3.49212	0.0295372
	1636618_at	FBgn0030836	CG8664	0.223435	0.781675	3.00093	0.0156428	0.17987	-3.49212	0.0295372
	1638573_at	FBgn0037147	CG7140	-0.269369	5.88205	-3.00041	0.0156557	0.17987	-3.49296	0.0295133
	1633657_at	FBgn0051533	CG31533	-0.282559	5.21162	-3.00028	0.015659	0.17987	-3.49317	0.0295072
	1625567_a_at	FBgn0036832	CG18223	-0.312684	3.26985	-3.00024	0.0156598	0.17987	-3.49322	0.0295057
	1636457_at	FBgn0085321	CG34292	-0.221548	5.88726	-2.99924	0.0156847	0.180046	-3.49482	0.0294599
	1627557_a_at	FBgn0038377	CG9632	-0.262824	6.62023	-2.99871	0.0156979	0.180089	-3.49568	0.0294354
	1627689_at	FBgn0032424	CG17010	-0.235333	5.27902	-2.9981	0.0157132	0.180155	-3.49666	0.0294074
	1627689_at	FBgn0040368	eIF4E7	-0.235333	5.27902	-2.9981	0.0157132	0.180155	-3.49666	0.0294074
	1641084_at	FBgn0035160	hng3	0.465583	2.27933	2.99685	0.0157445	0.180405	-3.49867	0.02935
	1641084_at	FBgn0035160	hng3	0.465583	2.27933	2.99685	0.0157445	0.180405	-3.49867	0.02935
	1627880_at	FBgn0050334	CG30334	-0.232933	6.00138	-2.99579	0.0157709	0.180598	-3.50037	0.0293017
	1631093_at	FBgn0039627	CG11837	0.287202	0.633114	2.99498	0.0157913	0.180645	-3.50167	0.0292646
	1628561_at	FBgn0051515	CG31515	-0.362823	4.89585	-2.99477	0.0157964	0.180645	-3.502	0.0292554
	1625486_a_at	FBgn0035975	PGRP-LA	0.302076	3.17218	2.99449	0.0158036	0.180645	-3.50246	0.0292423
	1640711_at	FBgn0050350	CG30350	-0.216499	5.98157	-2.99295	0.0158421	0.180966	-3.50492	0.0291725
	1629869_s_at	FBgn0267828	Fatp1	0.211726	5.66414	2.99261	0.0158507	0.180966	-3.50547	0.0291569
	1624846_at	FBgn0034221	CG10764	-0.382797	1.32049	-2.99137	0.0158821	0.181214	-3.50747	0.0291005
	1631447_at	FBgn0034655	CG10307	-0.189624	5.64899	-2.99069	0.015899	0.181298	-3.50855	0.0290701
	1637620_s_at	FBgn0035206	CG9186	0.221831	3.79972	2.98994	0.015918	0.181397	-3.50975	0.029036
	1623634_at	FBgn0036085	CG6527	-0.223969	7.27159	-2.98945	0.0159305	0.181397	-3.51055	0.0290136
	1629603_at	FBgn0032176	CG13127	-0.26705	3.13848	-2.98922	0.0159364	0.181397	-3.51092	0.0290032
	1629789_at	FBgn0038211	CG9649	0.274406	4.18835	2.98875	0.0159481	0.181421	-3.51166	0.0289823
	1624852_at	FBgn0263072	CG43347	-0.346539	1.36656	-2.98833	0.0159588	0.181435	-3.51234	0.0289631
	1624797_at	FBgn0030245	CG1637	0.254223	3.73132	2.98618	0.0160134	0.181451	-3.51579	0.0288663
	1640130_at	FBgn0051678	CG31678	0.204757	4.04419	2.98612	0.016015	0.181451	-3.51589	0.0288635
	1632683_s_at	FBgn0032587	CG5953	0.382426	9.14309	2.9861	0.0160155	0.181451	-3.51592	0.0288626
	1639526_a_at	FBgn0024329	Mekk1	0.224759	2.34285	2.98601	0.0160177	0.181451	-3.51606	0.0288587
	1637139_at	FBgn0259986	nab	0.193477	0.180482	2.98551	0.0160305	0.181487	-3.51687	0.0288361
	1627575_at	FBgn0085233	CG34204	-0.233204	5.67084	-2.98468	0.0160515	0.181557	-3.51819	0.028799
	1625351_at	FBgn0029702	CG15572	-0.238302	5.43352	-2.98451	0.0160558	0.181557	-3.51847	0.0287913
	1624185_at	FBgn0037440	CRAT	0.229717	3.67692	2.98343	0.0160834	0.181761	-3.5202	0.0287429
	1623518_s_at	FBgn0037912	sea	0.227232	6.40434	2.98262	0.0161041	0.181876	-3.5215	0.0287066
	1623518_s_at	FBgn0037913	fabp	0.227232	6.40434	2.98262	0.0161041	0.181876	-3.5215	0.0287066
	1629310_at	FBgn0030049	Trf4-1	-0.308116	0.306592	-2.98228	0.0161128	0.181876	-3.52205	0.0286914
	1634657_at	FBgn0040723	CG5011	0.323145	4.70502	2.98056	0.0161569	0.182265	-3.5248	0.0286146
	1634765_at	FBgn0037987	CG14739	-0.238366	6.71742	-2.97845	0.0162113	0.182586	-3.52821	0.0285203
	1636179_at	FBgn0051459	CG31459	-0.226797	7.04749	-2.97834	0.0162139	0.182586	-3.52837	0.0285157
	1637068_at	FBgn0037855	CG6621	-0.337803	1.45868	-2.97833	0.0162143	0.182586	-3.52839	0.0285152
	1636613_at	FBgn0261561	CG42675	-0.199494	0.0709712	-2.97709	0.0162463	0.182804	-3.53038	0.0284601
	1637635_at	FBgn0027546	CG4766	-0.261157	1.05417	-2.97683	0.0162529	0.182804	-3.53079	0.0284488
	1638060_at	FBgn0035720	CG10077	-0.224938	5.92544	-2.97636	0.0162651	0.182833	-3.53155	0.0284277
	1641570_s_at	FBgn0042175	CG18858	0.395487	5.33641	2.97535	0.0162913	0.183018	-3.53317	0.0283829
	1641570_s_at	FBgn0051683	CG31683	0.395487	5.33641	2.97535	0.0162913	0.183018	-3.53317	0.0283829
	1639372_s_at	FBgn0267726	CG46059	-0.203311	9.90327	-2.97485	0.0163042	0.183024	-3.53398	0.0283607
	1632220_s_at	FBgn0039792	CG2267	0.203615	8.89012	2.97436	0.016317	0.183024	-3.53477	0.028339
	1632220_s_at	FBgn0261597	RpS26	0.203615	8.89012	2.97436	0.016317	0.183024	-3.53477	0.028339
	1626047_at	FBgn0041780	Ssl2	-0.253769	0.413918	-2.97369	0.0163342	0.183024	-3.53583	0.0283096
	1634155_at	FBgn0035034	CG3565	-0.246925	6.2448	-2.97358	0.0163372	0.183024	-3.53602	0.0283046
	1624979_at	FBgn0038973	Pebp1	-0.746556	5.7994	-2.97347	0.0163401	0.183024	-3.5362	0.0282997
	1624008_at	FBgn0023512	eIF2Bepsilon	0.270066	2.77612	2.97282	0.0163568	0.183103	-3.53723	0.0282713
	1641429_at	FBgn0063498	GstE2	0.352352	3.02842	2.97216	0.016374	0.183187	-3.53829	0.0282422
	1636375_at	FBgn0265272	CG30060	-0.256763	4.83142	-2.97157	0.0163894	0.183233	-3.53924	0.028216
	1627070_x_at	FBgn0030940	CG15040	-0.304365	2.62383	-2.97126	0.0163974	0.183233	-3.53974	0.0282025
	1637851_at	FBgn0035815	Snmp2	-0.266766	2.08861	-2.97079	0.0164097	0.183262	-3.54049	0.0281819
	1631666_s_at	FBgn0037229	CG9766	-0.228757	1.90097	-2.96967	0.0164389	0.183481	-3.54229	0.0281327
	1635470_at	FBgn0040321	GNBP3	0.277235	3.99772	2.96847	0.0164702	0.183722	-3.54421	0.0280802
	1636823_at	FBgn0050087	CG30087	-0.199409	0.139314	-2.9669	0.0165114	0.18397	-3.54673	0.0280115
	1629410_at	FBgn0052572	CG32572	-0.255197	4.8338	-2.96648	0.0165225	0.18397	-3.54741	0.027993
	1632351_at	FBgn0041252	Femcoat	-0.253787	0.0324665	-2.9663	0.0165272	0.18397	-3.5477	0.0279851
	1640984_s_at	FBgn0027081	ThrRS	0.321556	4.09344	2.96615	0.0165313	0.18397	-3.54795	0.0279784
	1625679_at	FBgn0040715	CG15386	0.195006	5.25494	2.96373	0.016595	0.184509	-3.55183	0.0278729
	1625679_at	FBgn0259717	CG42371	0.195006	5.25494	2.96373	0.016595	0.184509	-3.55183	0.0278729
	1624969_s_at	FBgn0259219	CG42319	0.198104	6.61093	2.96326	0.0166074	0.184509	-3.55259	0.0278525
	1626664_at	FBgn0031522	CG3285	0.278786	3.69877	2.9632	0.0166089	0.184509	-3.55268	0.02785
	1631937_at	FBgn0051755	SoYb	-0.221891	0.3263	-2.96212	0.0166374	0.184575	-3.55441	0.0278033
	1636278_at	FBgn0034903	sona	-0.195587	-0.0373411	-2.96201	0.0166404	0.184575	-3.55459	0.0277982
	1639312_at	FBgn0015288	RpL22	0.199476	9.26281	2.96149	0.0166542	0.184575	-3.55543	0.0277757
	1623914_at	FBgn0017579	RpL14	0.201717	9.24307	2.96145	0.0166552	0.184575	-3.55549	0.027774
	1632850_at	FBgn0037073	Tsr1	0.261029	2.81803	2.96113	0.0166635	0.184575	-3.55599	0.0277604
	1634472_at	FBgn0030628	CG9114	0.199557	0.201117	2.96068	0.0166756	0.184601	-3.55672	0.0277407
	1626559_s_at	FBgn0033767	CG13148	-0.265691	1.20453	-2.95994	0.0166953	0.184636	-3.55792	0.0277085
	1628295_at	FBgn0036345	CG17300	-0.216583	6.44742	-2.95983	0.0166983	0.184636	-3.55809	0.0277037
	1630689_at	FBgn0053061	CG33061	-0.225469	3.62302	-2.95933	0.0167115	0.184667	-3.5589	0.0276821
	1638795_at	FBgn0266671	Sec6	0.23778	1.46599	2.95898	0.0167206	0.184667	-3.55945	0.0276673
	1629738_at	FBgn0035412	CG14957	0.24564	0.2068	2.95839	0.0167365	0.184735	-3.5604	0.0276416
	1624575_a_at	FBgn0004652	fru	-0.213916	0.358101	-2.95738	0.0167633	0.184924	-3.56202	0.0275982
	1629756_at	FBgn0027537	Nup93-1	0.233619	2.43989	2.9565	0.0167869	0.184989	-3.56344	0.0275601
	1629756_at	FBgn0027537	Nup93-1	0.233619	2.43989	2.9565	0.0167869	0.184989	-3.56344	0.0275601
	1624137_at	FBgn0031249	CG11911	0.817185	5.02329	2.95543	0.0168154	0.185174	-3.56515	0.0275143
	1640895_at	FBgn0035491	Dpy-30L2	-0.234015	7.89242	-2.9549	0.0168296	0.185183	-3.566	0.0274915
	1632226_at	FBgn0026592	Fie	0.1869	5.6253	2.95207	0.0169056	0.185787	-3.57055	0.0273702
	1627447_at	FBgn0033278	CG14759	-0.428443	4.29359	-2.95189	0.0169102	0.185787	-3.57083	0.0273628
	1623061_at	FBgn0002036	CG10561	-0.229637	6.55567	-2.95133	0.0169254	0.185846	-3.57173	0.0273387
	1629204_a_at	FBgn0038639	CG7705	0.238218	0.359172	2.95055	0.0169465	0.185905	-3.57299	0.0273052
	1628169_at	FBgn0039555	mRpS22	0.18577	3.9682	2.9504	0.0169504	0.185905	-3.57322	0.0272991
	1635589_at	FBgn0039737	CG7920	0.195831	8.45536	2.94928	0.0169808	0.185908	-3.57503	0.0272512
	1627364_s_at	FBgn0260441	RpS12	0.184635	9.12315	2.94877	0.0169945	0.185908	-3.57584	0.0272296
	1636403_at	FBgn0037900	CG5276	-0.200806	6.06153	-2.94876	0.0169948	0.185908	-3.57586	0.0272291
	1629014_s_at	FBgn0037298	Sccpdh1	0.231628	6.61604	2.94849	0.017002	0.185908	-3.57629	0.0272178
	1640885_at	FBgn0034082	CG10734	-0.216985	8.11788	-2.94847	0.0170026	0.185908	-3.57632	0.0272169
	1640532_at	FBgn0050356	CG30356	-0.268263	6.20271	-2.94815	0.0170112	0.185908	-3.57684	0.0272033
	1624556_s_at	FBgn0011206	bol	-0.226013	6.99467	-2.94785	0.0170193	0.185908	-3.57732	0.0271906
	1636473_at	FBgn0033953	CG12861	-0.223072	9.46641	-2.94654	0.017055	0.186188	-3.57943	0.0271348
	1637745_a_at	FBgn0038445	CG14891	-0.206762	6.00646	-2.94606	0.0170678	0.186188	-3.58019	0.0271148
	1631548_at	FBgn0050196	CG30196	-0.325912	1.5209	-2.94582	0.0170745	0.186188	-3.58058	0.0271044
	1628953_at	FBgn0038598	CG7131	-0.237729	6.27995	-2.94446	0.0171116	0.186485	-3.58277	0.0270467
	1635696_s_at	FBgn0027341	Gfat1	0.202762	0.611166	2.94389	0.0171269	0.186545	-3.58367	0.027023
	1636451_a_at	FBgn0265193	Atf-2	0.21389	2.09227	2.94336	0.0171415	0.186597	-3.58453	0.0270003
	1626232_at	FBgn0259234	Camta	-0.189215	3.54227	-2.94175	0.0171853	0.186967	-3.58711	0.0269327
	1632922_at	FBgn0030505	NFAT	0.23551	0.484623	2.94132	0.0171973	0.18699	-3.58781	0.0269143
	1634980_s_at	FBgn0261553	CG42671	-0.244209	4.14707	-2.9406	0.0172168	0.187095	-3.58896	0.0268844
	1625003_at	FBgn0038874	ETHR	-0.192889	0.0954923	-2.93944	0.0172487	0.187334	-3.59083	0.0268356
	1640927_at	FBgn0034483	CG16894	-0.224998	6.42955	-2.93835	0.0172785	0.18755	-3.59257	0.0267901
	1635528_s_at	FBgn0261593	RpS10b	0.185653	8.72785	2.93792	0.0172906	0.187574	-3.59327	0.0267717
	1639491_at	FBgn0034651	CG15676	-0.254339	5.37211	-2.93566	0.0173528	0.187994	-3.5969	0.0266775
	1631780_at	FBgn0004863	C15	-0.222706	0.816318	-2.93544	0.0173589	0.187994	-3.59725	0.0266683
	1628874_at	FBgn0030278	CG15200	-0.235715	6.94284	-2.93512	0.0173678	0.187994	-3.59777	0.0266549
	1640314_at	FBgn0035097	CG13405	-0.252374	5.61853	-2.93508	0.017369	0.187994	-3.59783	0.0266532
	1624835_at	FBgn0031347	CG10869	-0.214153	7.02694	-2.93439	0.0173879	0.188092	-3.59893	0.0266246
	1635390_s_at	FBgn0032889	CG9331	0.512745	6.55124	2.93354	0.0174116	0.188222	-3.6003	0.0265891
	1631795_at	FBgn0031209	Ir21a	-0.281755	0.163668	-2.93322	0.0174203	0.188222	-3.60081	0.026576
	1638741_at	FBgn0042693	wrd	-0.198663	2.25899	-2.93288	0.0174298	0.188222	-3.60136	0.0265619
	1639230_at	FBgn0042627	FASN2	-0.270979	5.59599	-2.93115	0.0174779	0.188634	-3.60414	0.02649
	1639126_at	FBgn0051874	Fum4	-0.218302	4.65645	-2.92873	0.0175452	0.189224	-3.60802	0.0263903
	1629520_at	FBgn0028920	CG8997	0.594947	7.32638	2.92804	0.0175645	0.189224	-3.60912	0.0263618
	1630236_s_at	FBgn0034390	CG15093	0.350417	6.19084	2.92751	0.0175795	0.189224	-3.60998	0.0263398
	1628746_at	FBgn0031546	CG8851	-0.250158	4.49277	-2.92722	0.0175877	0.189224	-3.61045	0.0263277
	1630092_at	FBgn0032047	CG13088	-0.228316	6.52004	-2.92706	0.017592	0.189224	-3.6107	0.0263213
	1639258_at	FBgn0036941	CG7335	-0.235885	5.5306	-2.92704	0.0175925	0.189224	-3.61073	0.0263206
	1633290_a_at	FBgn0086711	mol	-0.315097	2.19883	-2.92611	0.0176186	0.189398	-3.61222	0.0262823
	1624726_s_at	FBgn0037138	P5CDh1	-0.22966	5.82534	-2.92508	0.0176476	0.189498	-3.61388	0.02624
	1634778_at	FBgn0034835	CG3092	-0.217096	6.39027	-2.92507	0.017648	0.189498	-3.6139	0.0262395
	1622975_at	FBgn0036438	goddard	-0.228688	8.02386	-2.92346	0.0176931	0.189613	-3.61648	0.0261737
	1640543_at	FBgn0031345	CG18132	-0.321765	5.45422	-2.92323	0.0176998	0.189613	-3.61686	0.026164
	1624170_at	FBgn0030104	CG15368	-0.290036	3.95454	-2.92321	0.0177003	0.189613	-3.61689	0.0261633
	1633497_s_at	FBgn0053092	P5CDh2	-0.22601	6.50769	-2.92291	0.0177087	0.189613	-3.61736	0.0261511
	1629128_at	FBgn0033287	CG8701	-0.215925	9.60418	-2.92175	0.0177415	0.189857	-3.61923	0.0261037
	1634244_s_at	FBgn0011327	Uch-L5	-0.203251	9.65037	-2.92034	0.0177815	0.189959	-3.6215	0.0260459
	1634244_s_at	FBgn0051639	CG31639	-0.203251	9.65037	-2.92034	0.0177815	0.189959	-3.6215	0.0260459
	1626457_s_at	FBgn0004856	Bx42	-0.237437	0.718392	-2.92031	0.0177822	0.189959	-3.62154	0.026045
	1640554_at	FBgn0002781	mod(mdg4)	0.200948	0.809618	2.92019	0.0177856	0.189959	-3.62173	0.0260401
	1640086_at	FBgn0030280	CG11106	-0.246425	8.17871	-2.91968	0.0178001	0.189959	-3.62255	0.0260193
	1629960_s_at	FBgn0028407	Drep3	-0.349361	2.5121	-2.91873	0.0178271	0.190129	-3.62408	0.0259806
	1632646_at	FBgn0013323	Ptth	-0.21513	0.879544	-2.9177	0.0178562	0.19028	-3.62573	0.025939
	1638215_at	FBgn0037610	CG8043	-0.23197	7.09016	-2.91717	0.0178713	0.19028	-3.62658	0.0259174
	1625673_at	FBgn0037040	CG12983	-0.259173	5.62029	-2.91637	0.0178942	0.190416	-3.62787	0.0258849
	1628681_at	FBgn0051128	CG31128	-0.200626	5.98809	-2.91583	0.0179098	0.190439	-3.62874	0.0258628
	1634126_at	FBgn0051788	CG31788	-0.251611	8.20342	-2.91559	0.0179164	0.190439	-3.62912	0.0258534
	1625055_at	FBgn0014868	Ost48	0.200559	4.39064	2.91465	0.0179434	0.190618	-3.63063	0.0258153
	1624761_at	FBgn0031955	CG14535	-0.186994	0.0584001	-2.91274	0.017998	0.191091	-3.6337	0.0257384
	1626417_at	FBgn0250907	Cht10	-0.26103	0.301494	-2.91208	0.0180169	0.191118	-3.63475	0.0257119
	1630551_at	FBgn0036772	CG5290	0.313598	0.991946	2.91138	0.018037	0.191118	-3.63588	0.0256838
	1641699_at	FBgn0026326	Mad1	0.285871	1.76481	2.91125	0.0180409	0.191118	-3.63609	0.0256783
	1630737_at	FBgn0030429	CG4661	-0.257649	4.95434	-2.91014	0.0180727	0.191312	-3.63787	0.0256339
	1636388_at	FBgn0031036	CG14220	0.217097	1.19513	2.90991	0.0180793	0.191312	-3.63824	0.0256247
	1631642_at	FBgn0038765	CG4424	0.260975	0.743056	2.90824	0.0181276	0.191372	-3.64093	0.0255576
	1628541_at	FBgn0046689	Takl1	0.233996	0.396258	2.90789	0.0181377	0.191372	-3.64149	0.0255438
	1627813_at	FBgn0037502	wa-cup	-0.236737	6.22142	-2.90764	0.018145	0.191372	-3.64189	0.0255337
	1640084_a_at	FBgn0033258	CG8712	-0.193811	5.17496	-2.90757	0.0181471	0.191372	-3.64201	0.0255307
	1626053_at	FBgn0041097	robo3	-0.188289	0.44109	-2.90747	0.0181499	0.191372	-3.64217	0.0255268
	1624450_at	FBgn0019952	Orct	-0.345317	3.55786	-2.90723	0.0181568	0.191372	-3.64255	0.0255173
	1636339_at	FBgn0033856	CG13334	-0.271835	2.79704	-2.90693	0.0181653	0.191372	-3.64302	0.0255056
	1626010_at	FBgn0039371	CG4960	-0.23456	4.98745	-2.90692	0.0181658	0.191372	-3.64305	0.0255049
	1639869_a_at	FBgn0051025	Ppi1	-0.221879	7.31013	-2.90619	0.018187	0.191489	-3.64422	0.0254758
	1630460_at	FBgn0035003	CG15873	-0.220404	3.529	-2.90516	0.0182168	0.191696	-3.64587	0.0254348
	1628711_at	FBgn0032370	CG12307	-0.274418	7.20254	-2.90451	0.0182357	0.191789	-3.64692	0.0254089
	1630102_at	FBgn0040996	CG12617	-0.197159	6.67354	-2.90376	0.0182575	0.191883	-3.64812	0.0253792
	1626730_s_at	FBgn0026160	tna	-0.201888	6.19912	-2.90338	0.0182686	0.191883	-3.64873	0.025364
	1641674_at	FBgn0264310	lncRNA:CR43785	-0.229007	0.966252	-2.90316	0.0182751	0.191883	-3.64909	0.0253552
	1632374_at	FBgn0030878	CG6769	0.23002	2.8637	2.90165	0.0183192	0.19224	-3.65152	0.0252953
	1639874_at	FBgn0038018	Tim17a1	-0.224417	5.6605	-2.90116	0.0183335	0.192272	-3.6523	0.0252759
	1640776_at	FBgn0085298	CG34269	-0.210724	3.10532	-2.90067	0.0183476	0.192272	-3.65308	0.0252569
	1633242_a_at	FBgn0031574	TTLL4B	-0.232294	6.4026	-2.9005	0.0183527	0.192272	-3.65336	0.02525
	1638762_at	FBgn0038281	RpL10Aa	-0.25275	6.97042	-2.89776	0.0184329	0.193006	-3.65775	0.025142
	1632621_at	FBgn0037750	Whamy	0.208657	1.8613	2.89655	0.0184686	0.193214	-3.6597	0.0250944
	1637583_at	FBgn0033934	CG17385	0.201145	4.67804	2.8964	0.0184732	0.193214	-3.65995	0.0250883
	1629365_at	FBgn0050324	CG30324	-0.276567	7.72947	-2.89399	0.0185441	0.193844	-3.66381	0.0249941
	1630634_s_at	FBgn0015756	RpL9	0.201917	9.3946	2.89336	0.0185629	0.193844	-3.66482	0.0249692
	1628303_at	FBgn0266696	Svil	-0.317833	1.53581	-2.89317	0.0185684	0.193844	-3.66512	0.024962
	1628303_at	FBgn0266696	Svil	-0.317833	1.53581	-2.89317	0.0185684	0.193844	-3.66512	0.024962
	1631445_at	FBgn0052106	CG32106	-0.333828	4.22871	-2.89209	0.0186004	0.193844	-3.66686	0.0249198
	1625268_at	FBgn0036336	ste14	0.274341	1.79111	2.89187	0.0186069	0.193844	-3.66721	0.0249113
	1633212_s_at	FBgn0051226	CG31226	-0.22879	9.69192	-2.89164	0.0186137	0.193844	-3.66758	0.0249023
	1639883_at	FBgn0001085	fz	-0.276813	0.745209	-2.89155	0.0186166	0.193844	-3.66773	0.0248985
	1638375_at	FBgn0020371	Tim17b2	-0.243068	6.97254	-2.8913	0.0186239	0.193844	-3.66813	0.0248889
	1638415_at	FBgn0013954	Fkbp12	0.191174	7.39954	2.89092	0.0186352	0.193844	-3.66874	0.0248741
	1624529_at	FBgn0005533	RpS17	0.18172	9.07594	2.89056	0.0186458	0.193844	-3.66931	0.0248602
	1633447_at	FBgn0034389	Mctp	0.450072	2.85635	2.89034	0.0186526	0.193844	-3.66968	0.0248513
	1635461_at	FBgn0034988	cN-IIIB	0.344425	1.79022	2.89022	0.0186561	0.193844	-3.66987	0.0248467
	1635461_at	FBgn0034988	cN-IIIB	0.344425	1.79022	2.89022	0.0186561	0.193844	-3.66987	0.0248467
	1627326_a_at	FBgn0032633	Lrch	-0.227959	2.19594	-2.88965	0.018673	0.193912	-3.67078	0.0248247
	1640301_a_at	FBgn0259111	Ndae1	-0.23681	3.13984	-2.88884	0.018697	0.194056	-3.67207	0.0247933
	1637854_at	FBgn0033610	CG18335	-0.245662	5.82081	-2.88827	0.0187142	0.194119	-3.673	0.024771
	1624627_s_at	FBgn0011725	twin	-0.187137	6.95857	-2.88796	0.0187236	0.194119	-3.6735	0.0247588
	1630866_at	FBgn0261461	RhoGAP18B	0.216161	1.75636	2.88735	0.0187416	0.1942	-3.67447	0.0247354
	1637987_at	FBgn0260634	eIF4G2	-0.194133	7.37891	-2.88368	0.0188517	0.195233	-3.68037	0.0245937
	1624987_at	FBgn0031240	CG3345	-0.221898	6.64992	-2.88234	0.0188921	0.195448	-3.68252	0.024542
	1626544_at	FBgn0026088	CG14818	0.18067	6.34218	2.88189	0.0189056	0.195448	-3.68324	0.0245248
	1623292_at	FBgn0053128	CG33128	0.237972	0.317722	2.8817	0.0189114	0.195448	-3.68355	0.0245175
	1638910_at	FBgn0031333	CG5561	-0.245792	6.31343	-2.88163	0.0189136	0.195448	-3.68367	0.0245146
	1632755_at	FBgn0051266	CG31266	0.221367	1.84685	2.8801	0.0189598	0.195727	-3.68612	0.024456
	1637457_at	FBgn0036926	CG7646	-0.225861	3.96177	-2.87974	0.0189706	0.195727	-3.68669	0.0244423
	1634427_at	FBgn0040649	CG15461	-0.223842	5.76744	-2.87934	0.0189828	0.195727	-3.68734	0.0244269
	1630707_at	FBgn0023214	edl	0.411078	2.75617	2.87926	0.0189853	0.195727	-3.68747	0.0244237
	1630813_at	FBgn0013325	RpL11	0.184386	9.12992	2.8788	0.0189991	0.195727	-3.6882	0.0244063
	1639008_at	FBgn0028850	CG15260	-0.284289	4.99275	-2.87868	0.0190027	0.195727	-3.68839	0.0244018
	1640157_at	FBgn0031176	whe	0.219425	9.85111	2.87823	0.0190163	0.195746	-3.68912	0.0243846
	1628408_at	FBgn0054041	CG34041	-0.369954	3.33393	-2.87743	0.0190408	0.195746	-3.69041	0.0243538
	1627959_a_at	FBgn0019828	dj	-0.350397	4.592	-2.87732	0.019044	0.195746	-3.69058	0.0243499
	1638807_s_at	FBgn0030796	CG4829	0.371696	2.61588	2.87693	0.0190561	0.195746	-3.69122	0.0243347
	1628529_a_at	FBgn0066303	CG33932	0.189403	3.94209	2.87682	0.0190594	0.195746	-3.69139	0.0243305
	1628529_a_at	FBgn0066304	Rpp20	0.189403	3.94209	2.87682	0.0190594	0.195746	-3.69139	0.0243305
	1639612_s_at	FBgn0038797	Dic2	-0.246915	7.39595	-2.87638	0.0190727	0.195746	-3.6921	0.0243138
	1641576_a_at	FBgn0038344	obe	0.349139	1.05772	2.87591	0.0190869	0.195746	-3.69285	0.0242961
	1629107_at	FBgn0005593	RpL7	0.192643	8.93347	2.87591	0.0190871	0.195746	-3.69285	0.0242959
	1625072_s_at	FBgn0023416	Ac3	-0.298158	2.80921	-2.87486	0.019119	0.195968	-3.69454	0.024256
	1623909_s_at	FBgn0001269	inv	-0.260804	0.459225	-2.87188	0.0192102	0.196664	-3.69932	0.0241431
	1623587_at	FBgn0051730	CG31730	-0.227987	5.36573	-2.87186	0.0192109	0.196664	-3.69936	0.0241422
	1634922_s_at	FBgn0040384	CG32795	0.21878	3.82674	2.87162	0.0192182	0.196664	-3.69974	0.0241332
	1641400_at	FBgn0030716	CG9170	-0.246408	2.4197	-2.87047	0.0192535	0.19692	-3.70159	0.0240897
	1638090_at	FBgn0032162	CG4592	-0.198603	3.98081	-2.86936	0.0192876	0.197162	-3.70336	0.0240479
	1633980_at	FBgn0035440	CG14969	0.193414	2.58662	2.86865	0.0193096	0.197281	-3.70451	0.024021
	1626326_at	FBgn0051436	CG31436	0.50911	2.08626	2.86627	0.019383	0.197801	-3.70833	0.0239318
	1626158_s_at	FBgn0026630	nes	0.189599	5.4465	2.86615	0.0193868	0.197801	-3.70853	0.0239271
	1634762_a_at	FBgn0034394	CG15096	0.209913	7.35613	2.86594	0.0193932	0.197801	-3.70886	0.0239193
	1633080_at	FBgn0035782	CG14835	-0.198336	6.72569	-2.86531	0.0194127	0.197801	-3.70987	0.0238958
	1623607_at	FBgn0034521	Mgat1	-0.305436	4.72071	-2.8642	0.0194473	0.198047	-3.71166	0.023854
	1633788_s_at	FBgn0037448	CG15186	-0.23122	0.994872	-2.86379	0.0194599	0.198069	-3.71231	0.0238389
	1633158_at	FBgn0030015	CG10761	-0.257709	4.87888	-2.86249	0.0195005	0.198325	-3.7144	0.0237902
	1635049_at	FBgn0035112	CG13877	-0.286252	3.90961	-2.86231	0.019506	0.198325	-3.71469	0.0237836
	1632540_at	FBgn0015001	iotaTry	0.428326	1.61001	2.86121	0.0195403	0.198567	-3.71645	0.0237426
	1640734_a_at	FBgn0038721	subdued	-0.254911	3.92581	-2.86048	0.019563	0.198692	-3.71762	0.0237155
	1640734_a_at	FBgn0038721	subdued	-0.254911	3.92581	-2.86048	0.019563	0.198692	-3.71762	0.0237155
	1631285_at	FBgn0029837	Tsp5D	-0.312985	4.75536	-2.85932	0.0195993	0.198796	-3.71949	0.0236724
	1630575_at	FBgn0039674	CG1907	0.254764	5.82699	2.85877	0.0196167	0.198796	-3.72038	0.0236518
	1623286_at	FBgn0052298	CG32298	-0.230101	7.28583	-2.85869	0.0196192	0.198796	-3.72051	0.0236489
	1623286_at	FBgn0052299	CG32299	-0.230101	7.28583	-2.85869	0.0196192	0.198796	-3.72051	0.0236489
	1640830_at	FBgn0250816	AGO3	-0.235544	1.9399	-2.85836	0.0196295	0.198796	-3.72103	0.0236367
	1623229_at	FBgn0033048	CG7881	-0.272889	2.37931	-2.85815	0.019636	0.198796	-3.72137	0.023629
	1636420_at	FBgn0032505	CG16826	0.236363	8.90948	2.85814	0.0196363	0.198796	-3.72138	0.0236287
	1629391_at	FBgn0040093	lectin-46Ca	0.237627	5.37747	2.85764	0.019652	0.19885	-3.72219	0.0236101
	1631216_a_at	FBgn0034606	ASPP	-0.205249	1.44791	-2.85562	0.0197156	0.199386	-3.72543	0.0235354
	1633346_at	FBgn0036184	PCID2	0.302224	1.94307	2.85515	0.0197305	0.199431	-3.7262	0.0235179
	1632504_at	FBgn0037004	CG17637	-0.194696	6.32793	-2.85462	0.019747	0.199461	-3.72703	0.0234987
	1641632_at	FBgn0033828	CG17048	-0.324732	4.83735	-2.85438	0.0197545	0.199461	-3.72742	0.0234898
	1641632_at	FBgn0265104	lncRNA:CR44206	-0.324732	4.83735	-2.85438	0.0197545	0.199461	-3.72742	0.0234898
	1638439_a_at	FBgn0017545	RpS3A	0.189123	9.96009	2.85335	0.0197872	0.199536	-3.72908	0.0234518
	1630430_a_at	FBgn0259247	stw	-0.206339	3.04481	-2.85303	0.0197973	0.199536	-3.72959	0.0234401
	1627008_at	FBgn0029946	CG15034	-0.25788	6.52135	-2.85257	0.0198119	0.199536	-3.73033	0.023423
	1625856_at	FBgn0262656	Myc	0.257402	4.48205	2.85252	0.0198135	0.199536	-3.73041	0.0234212
	1633955_at	FBgn0011822	Pgcl	0.287469	0.730056	2.85231	0.0198203	0.199536	-3.73076	0.0234134
	1627282_at	FBgn0039812	CG15548	-0.241183	4.12623	-2.85196	0.0198312	0.199536	-3.73131	0.0234007
	1636021_at	FBgn0040648	CG11666	-0.296248	4.00616	-2.85182	0.0198357	0.199536	-3.73154	0.0233955
	1640052_at	FBgn0040705	ND-B8	-0.206159	5.25923	-2.8514	0.0198489	0.199563	-3.73221	0.0233802
[truncated: 14,408 more rows]
